# Supplementary material
Source: PubMed Central journal article supplement (PMC6583638)
Supplement: jama-320-2448-s002.pdf [file jama-320-2448-s002.pdf]

## Supplementary Online Content

Busse JW, Wang L, Kamaleldin M, et al. Opioids for chronic noncancer pain: a systematic review and meta-analysis. *JAMA*. doi:10.1001/jama.2018.18472

eAppendix 1: Literature search strategies

eAppendix 2: Reference list of eligible trials

eTable 1. Conversion factors for opioids

eTable 2. Criteria for assessing the credibility of significant subgroup effects

eTable 3. Characteristics of 96 eligible randomized clinical trials

eTable 4. Summary of baseline pain scores in 23 enrichment trials and 51 non-enrichment trials

eTable 5. Risk of bias assessment of 96 eligible randomized clinical trials

eTable 6. Original data for pain relief reported by 80 randomized clinical trials of opioids vs. placebo

eTable 7. Multiple meta-regression of length of follow-up, clinical condition (neuropathic vs. non-neuropathic conditions) and pain relief

eTable 8. GRADE evidence profile of adverse events for opioids vs. placebo and patients with chronic noncancer pain from 83 randomized clinical trials

eTable 9. GRADE evidence profile of opioids vs. NSAIDs for patients with chronic noncancer pain from 12 randomized clinical trials

eTable 10. GRADE evidence profile of opioids vs. tricyclic antidepressants for patients with chronic noncancer pain from 3 randomized clinical trials

eTable 11. GRADE evidence profile of opioids vs. anticonvulsants for patients with chronic noncancer pain from 3 randomized clinical trials

eTable 12. GRADE evidence profile of opioids vs. nabilone for patients with chronic noncancer pain from 1 randomized clinical trial

eTable 13. GRADE evidence profile of opioids vs. usual care for patients with chronic noncancer pain from 1 randomized clinical trial

eTable 14. Results of within-trial comparisons of different opioid doses

eTable 15a. Subgroup analyses for pain, physical and emotional functioning for randomized clinical trials of opioids vs. placebo

eTable 15b. Subgroup analyses for role and social functioning, and sleep quality for randomized clinical trials of opioids vs. placebo

eTable 15c. Subgroup analyses for vomiting, nausea and constipation for randomized clinical trials of opioids vs. placebo

eTable 15d. Subgroup analyses for dizziness, drowsiness, and headache for randomized clinical trials of opioids vs. placebo

eTable 15e. Subgroup analyses for pruritus and dry mouth for randomized clinical trials of opioids vs. placebo

eTable 16a. Subgroup analyses for pain, physical functioning and vomiting for randomized clinical trials of opioids vs. NSAIDs

eTable 16b. Subgroup analyses for nausea, constipation and dizziness for randomized clinical trials of opioids vs. NSAIDs

eTable 16c. Subgroup analyses for drowsiness, headache and pruritus for randomized clinical trials of opioids vs. NSAIDs

eTable 17. Meta-regressions of length of follow-up and proportion of loss to follow-up for randomized clinical trials of opioids vs. placebo and opioids vs. NSAIDs

eTable 18. Sensitivity analysis by excluding studies with data imputed for non-significant results

eTable 19. Sensitivity analysis of DerSimonian-Laird method vs. Hartung-Knapp-Sidik-Jonkman method for random effects meta-analysis

eFigure 1. Meta-regression for pain relief and length of follow-up for 80 randomized clinical trials of opioids vs. placebo

eFigure 2. Subgroup analysis for pain relief and length of follow-up (<3 months vs.  $\geq$ 3 months) from 80 randomized clinical trials of opioids vs. placebo

eFigure 3. Funnel plot for pain relief at  $\geq$  3 months follow-up for 42 randomized clinical trials of opioids vs. placebo

eFigure 4. Subgroup analysis for pain relief and objective vs. subjective conditions from 76 randomized clinical trials of opioids vs. placebo

eFigure 5. Subgroup analysis for pain relief and neuropathic vs. nociceptive vs. central sensitization from 76 randomized clinical trials of opioids vs. placebo

eFigure 6. Subgroup analysis for pain relief and neuropathic vs. non-neuropathic conditions from 76 randomized clinical trials of opioids vs. placebo

eFigure 7. Funnel plot for physical function for 51 randomized clinical trials of opioids vs. placebo

eFigure 8. Emotional functioning on the SF-36 mental component summary scale among chronic noncancer pain patients receiving opioids vs. placebo from 37 randomized clinical trials

eFigure 9. Role functioning on the SF-36 role limitations due to physical problems sub-scale among chronic noncancer pain patients receiving opioids vs. placebo from 32 randomized clinical trials

eFigure 10. Social functioning on the SF-36 social functioning sub-scale among chronic noncancer pain patients receiving opioids vs. placebo from 29 randomized clinical trials

eFigure 11. Sleep quality on a 100 mm VAS among chronic noncancer pain patients receiving opioids vs. placebo from 31 randomized clinical trials

eFigure 12. Meta-regression for sleep quality and length of follow-up for 31 randomized clinical trials of opioids vs. placebo

eFigure 13. Vomiting among chronic noncancer pain patients receiving opioids vs. placebo from 51 randomized clinical trials

eFigure 14. Meta-regression for pain relief and opioid dose among 5 trials with 14 within-study comparisons

eFigure 15. Meta-regression for physical function and opioid dose among 4 trials with 11 within-study comparisons

eFigure 16. Meta-regression for gastrointestinal adverse events and opioid dose among 5 trials with 14 within-study comparisons

This supplementary material has been provided by the authors to give readers additional information about their work.

## eAppendix 1: Literature Search Strategies<sup>a</sup>

Database: OVID Medline Epub Ahead of Print, In-Process & Other Non-Indexed Citations, Ovid MEDLINE(R) Daily and Ovid MEDLINE(R) 1946 to Present (1 April 2018)

### Search Strategy:

- 
- 1 (chronic adj4 pain\*).mp. [mp=title, abstract, original title, name of substance word, subject heading word, keyword heading word, protocol supplementary concept word, rare disease supplementary concept word, unique identifier, synonyms] (58120)
  - 2 Chronic Pain/ (9487)
  - 3 exp Osteoarthritis/ (54546)
  - 4 osteoarthritis\*.mp. (75997)
  - 5 osteo-arthritis.mp. (367)
  - 6 degenerative arthrit\*.mp. (1219)
  - 7 exp Arthritis, Rheumatoid/ (104666)
  - 8 exp Neuralgia/ (17706)
  - 9 Diabetic Neuropathies/ (13601)
  - 10 (neuropath\* adj5 (pain\* or diabet\*)).mp. (36937)
  - 11 neuralg\*.mp. (23772)
  - 12 zoster.mp. (19225)
  - 13 Irritable Bowel Syndrome/ (6066)
  - 14 (IBS or irritable colon or irritable bowel).mp. (14347)
  - 15 Migraine Disorders/ (23014)
  - 16 migraine.mp. (34507)
  - 17 Fibromyalgia/ (7573)
  - 18 fibromyalg\*.mp. (10324)
  - 19 complex regional pain syndromes/ or exp causalgia/ or exp reflex sympathetic dystrophy/ (5219)
  - 20 (complex regional pain syndromes or causalgia).mp. (2139)
  - 21 Pain, Intractable/ (6021)
  - 22 Phantom Limb/ (1737)
  - 23 Hyperalgesia/ (10026)
  - 24 ((noncancer\* or non-cancer\* or chronic\* or recurrent or persist\* or non-malign\*) adj3 pain).mp. (16519)
  - 25 or/1-24 (374187)
  - 26 exp back pain/ or exp failed back surgery syndrome/ or exp low back pain/ (34838)
  - 27 Radiculopathy/ or radiculopathy.mp. (8057)
  - 28 musculoskeletal pain/ or headache/ (27891)
  - 29 exp Arthralgia/ (10991)
  - 30 exp Headache Disorders/ (31166)
  - 31 headache\*.mp. (83353)
  - 32 Temporomandibular Joint Dysfunction Syndrome/ (4838)
  - 33 ((TMJ or TMJD) and pain\*).mp. (2434)
  - 34 whiplash.mp. or exp whiplash injury/ (3756)
  - 35 exp Cumulative Trauma Disorders/ (12612)
  - 36 exp Peripheral Nervous System Diseases/dt [Drug Therapy] (12959)
  - 37 Pain Measurement/de [Drug Effects] (6352)
  - 38 (backache\* or backpain\* or dorsalg\* or arthralgi\* or polyarthralgi\* or arthrodyni\* or myalgi\* or fibromyalgi\* or myodyni\* or neuralgi\* or ischialgi\* or crps or rachialgi\*).ab,ti. (39779)
  - 39 ((back or discogen\* or bone or musculoskelet\* or muscle\* or skelet\* or spinal or spine or vertebra\* or joint\* or arthritis or Intestin\* or neuropath\* or neck or cervical\* or head or facial\* or complex or radicular or cervicobrachi\* or orofacial or somatic or shoulder\* or knee\* or hip or hips) adj3 pain).mp. (144063)

<sup>a</sup> a preliminary search was performed in 2010 using the strategy published in the review protocol, see Supplement 1 p. 7-8

40 or/26-39 (299548)  
 41 (acute or emergency or preoperative or postoperative).ti.ab. (1700816)  
 42 40 not 41 (252546)  
 43 25 or 42 (532409)  
 44 exp Analgesics, Opioid/ (103616)  
 45 (opiod\* or opiate\*).mp. (114059)  
 46 (alfentanil or alphaprodine or beta-casomorphin\$ or buprenorphine or carfentanil or codeine or deltorphin or dextromethorphan or dezocine or dihydrocodeine or dihydromorphine or enkephalin\$ or ethylketocyclazocine or ethylmorphine or etorphine or fentanyl or heroin or hydrocodone or hydromorphone or ketobemidone or levorphanol or lofentanil or meperidine or meptazinol or methadone or methadyl acetate or morphine or nalbuphine or opium or oxycodone or oxymorphone or pentazocine or phenazocine or phenoperidine or pirinitramide or promedol or propoxyphene or remifentanil or sufentanil or tilidine or tapentadol).mp.(143753)  
 47 or/44-46 (199233)  
 48 exp Narcotics/ (111500)  
 49 narcotic\*.mp. (57165)  
 50 (adolonta or Anpec or Ardinex or Asimadoline or Alvimopam or amadol or bionalgic or biokanol or Codinovo or contramal or Demerol or Dicodid or Dihydrocodeinone or dihydromorphinone or dihydrohydroxycodone or dihydronone or dilaudid or dinarkon or dolsin or dolosal or dolin or dolantin or dolargan or dolcontral or duramorph or duromorph or duragesic or durogesic or eucodal or Fedotzine or Fentanest or Fentora or Fortral or Hycodan or Hycon or Hydrocodone or Hydrocodeinonebitartrate or hydromorphon or hydroxycodoneinon or isocodeine or isonipecaïn or jutadol or laudacon or l dromoran or levodroman or levorphan or levo-dromoran or levodromoran or lexis or lidol or lydol or morfin or morfine or morphia or morphin or morphinium or morphinene or morphium or ms contin or n-methylmorphine or n methylmorphine or nobligan or numorphan or oramorph or oxycodoneinon or oxiconum or oxycone or oxycontin or palladone or pancodine or pethidine or phentanyl or prontofort or robidone or skenan or sublimaze or sulfentanyl or sulfentanil or sufenta or takadol or talwin or theocodin or tramadol or tramadolhameln or tramadololor or tramadura or tramagetic or tramagit or tramake or tramal or tramex or tramundin or trasedal or theradol or tiral or topalgic or tradol or tradolpuren or tradonal or tralgiol or tramadorsch or tramadin or tramadoc or ultram or zamudol or zumalgic or zydol or zytram).mp. [mp=title, abstract, original title, name of substance word, subject heading word, keyword heading word, protocol supplementary concept word, rare disease supplementary concept word, unique identifier, synonyms] (9563)  
 51 or/44-50 (227775)  
 52 43 and 51 (22678)  
 53 epidemiologic studies/ (7641)  
 54 exp Case-Control Studies/ (904344)  
 55 exp Cohort Studies/ (1723417)  
 56 Case control.tw. (106622)  
 57 (cohort adj (study or studies)).tw. (151570)  
 58 Cohort analy\$.tw. (6083)  
 59 (Follow up adj (study or studies)).tw. (44718)  
 60 ((observational or epidemiol\*) adj (study or studies)).tw. (156420)  
 61 Longitudinal.tw. (201362)  
 62 Retrospective.mp. or prospective.tw. (1247587)  
 63 Cross sectional.tw. (272577)  
 64 Cross-sectional studies/ (260504)  
 65 or/53-64 (2717825)  
 66 exp animals/ not humans.sh. (4438182)  
 67 65 not 66 (2649950)  
 68 52 and 67 (3763)  
 69 randomized controlled trial.pt. (456617)  
 70 controlled clinical trial.pt. (92277)  
 71 randomized.ab. (406479)

- 72 placebo.ab. (187496)
- 73 drug therapy.fs. (2003496)
- 74 randomly.ab. (287373)
- 75 trial.ab. (422125)
- 76 groups.ab. (1777409)
- 77 or/69-76 (4167722)
- 78 clinical trial.mp. or clinical trial.pt. or random:.mp. or tu.xs. (5199787)
- 79 randomized controlled trial.pt. or randomized controlled trial.mp. (476635)
- 80 randomized controlled trial.pt. or randomized.mp. or placebo.mp. (790362)
- 81 or/78-80 (5214838)
- 82 77 or 81 (6680171)
- 83 exp animals/ not humans.sh. (4438182)
- 84 82 not 83 (5604099)
- 85 43 and 51 and 84 (14496)
- 86 limit 85 to yr="2010 -Current" (6438)
- 87 68 or 86 (8377)
- 88 (MEDLINE or systematic review or literature search).tw. or meta analysis.mp.pt. (256038)
- 89 43 and 51 and 88 (881)
- 90 87 or 89 (8697)
- 91 exp Sleep Apnea Syndromes/ (30607)
- 92 sleep apn?ea.mp. (38637)
- 93 sleep-disordered breathing.mp. (5685)
- 94 hypogonadism.mp. or Hypogonadism/ (13040)
- 95 ((testosterone or androgen) and (deprivation or deficiency)).mp. (12336)
- 96 OPIAD.mp. (10)
- 97 or/91-96 (64161)
- 98 52 and 97 (144)
- 99 90 or 98 (8736)

## EMBASE

**Database: Embase <1974 to 2018 March 30> via OVID**

### Search Strategy:

- 
- 1 (chronic adj4 pain\*).mp. [mp=title, abstract, heading word, drug trade name, original title, device manufacturer, drug manufacturer, device trade name, keyword, floating subheading word] (95808)
  - 2 chronic pain/ (49908)
  - 3 exp osteoarthritis/ (111874)
  - 4 osteoarthrit\*.mp. (121825)
  - 5 osteo-arthritis.mp. (446)
  - 6 degenerative arthrit\*.mp. (1509)
  - 7 exp rheumatoid arthritis/ (185025)
  - 8 exp neuralgia/ (93521)
  - 9 diabetic neuropathy/ (21550)
  - 10 (neuropath\* adj5 (pain\* or diabet\*)).mp. (64767)
  - 11 neuralg\*.mp. (28411)
  - 12 zoster.mp. (34755)
  - 13 irritable colon/ (22437)
  - 14 (Irritable Bowel Syndrome or IBS).mp. (21332)
  - 15 exp migraine/ (55747)
  - 16 migraine.mp. (61627)
  - 17 fibromyalgia/ (17530)

18 fibromyalg\*.mp. (18837)  
19 reflex sympathetic dystrophy.mp. (2313)  
20 (complex regional pain syndromes or causalgia).mp. (1322)  
21 intractable pain/ (4424)  
22 phantom limb.mp. or agnosia/ or phantom pain/ or amputation stump/ (7918)  
23 hyperalgesia/ (17434)  
24 ((noncancer\* or non-cancer\*or chronic\* or recurrent or persist\* or non-malign\*) adj3 pain).mp. (23916)  
25 or/1-24 (648410)  
26 exp backache/ (94040)  
27 radiculopathy.mp. or exp radiculopathy/ (34877)  
28 musculoskeletal pain/ (8712)  
29 exp arthralgia/ (51350)  
30 headache/ (188012)  
31 headache\*.mp. (244285)  
32 temporomandibular joint disorder/ (12271)  
33 ((TMJ or TMJD) and pain\*).mp. (3303)  
34 whiplash.mp. or whiplash injury/ (4954)  
35 exp cumulative trauma disorder/ (18608)  
36 or/26-35 (427712)  
37 (acute or emergency or preoperative or postoperative).ti,ab. (2308527)  
38 36 not 37 (361643)  
39 25 or 38 (914630)  
40 exp narcotic analgesic agent/ (301417)  
41 (opioid\* or opiate\*).mp. (169179)  
42 (alfentanil or alphaprodine or beta-casomorphin\$ or buprenorphine or carfentanil or codeine or deltorphin or dextromethorphan or dezocine or dihydrocodeine or dihydromorphine or enkephalin\$ or ethylketocyclazocine or ethylmorphine or etorphine or fentanyl or heroin or hydrocodone or hydromorphone or ketobemidone or levorphanol or lofentanil or meperidine or meptazinol or methadone or methadyl acetate or morphine or nalbuphine or opium or oxycodone or oxymorphone or pentazocine or phenazocine or phenoperidine or pirinitramide or promedol or propoxyphene or remifentanil or sufentanil or tilidine or tapentadol).mp. (267802)  
43 (adolonta or Anpec or Ardinex or Asimadoline or Alvimopam or amadol or biodalgic or biokanol or Codinovo or contramal or Demerol or Dicodid or Dihydrocodeinone or dihydromorphinone or dihydrohydroxycodone or dihydrone or dilaudid or dinarkon or dolsin or dolosal or dolin or dolantin or dolargan or dolcontral or duramorph or duromorph or duragesic or durogesic or eucodal or Fedotzine or Fentanest or Fentora or Fortral or Hycodan or Hycon or Hydrocodone or Hydrocodeinonebitartrate or hydromorphon or hydroxycodoneinon or isocodeine or isonipecaïn or jutadol or laudacon or l dromoran or levodroman or levorphan or levo-dromoran or levodromoran or lexir or lidol or lydol or morfin or morfine or morphia or morphin or morphinium or morphinene or morphium or ms contin or n-methylmorphine or n methylmorphine or nobligan or numorphan or oramorph or oxycodoneinon or oxiconum or oxycone or oxycontin or palladone or pancodine or pethidine or phentanyl or prontofort or robidone or skenan or sublimaze or sulfentanil or sulfentanil or sufenta or takadol or talwin or theocodin or tramadol or tramadolhameln or tramadol or tramadura or tramagetic or tramagit or tramake or tramal or tramex or tramundin or trasedal or theradol or tiral or topalgic or tradol or tradolpuren or tradonal or tralgiol or tramadorsch or tramadin or tramadoc or ultram or zamudol or zumalgic or zydol or zytram).mp. (48881)  
44 or/40-43 (382196)  
45 39 and 44 (49840)  
46 exp animals/ or exp invertebrate/ or animal experiment/ or animal model/ or animal tissue/ or animal cell/ or nonhuman/ (25820080)  
47 human/ or normal human/ or human cell/ (19514704)  
48 46 and 47 (19466620)  
49 46 not 48 (6353460)  
50 45 not 49 (45275)

51 animals/ not humans/ (1328770)  
 52 nonhuman/ (5394936)  
 53 exp Animal Experiment/ (2198806)  
 54 exp Experimental Animal/ (580077)  
 55 animal model/ (1084121)  
 56 exp Rodent/ (3466641)  
 57 (rat or rats or mouse or mice).ti. (1469571)  
 58 or/51-57 (7760169)  
 59 50 not 58 (40524)  
 60 clinical study/ (154139)  
 61 case control study/ (123874)  
 62 longitudinal study/ (110417)  
 63 intervention study/ (35810)  
 64 prospective study/ (436528)  
 65 retrospective study/ (630317)  
 66 cohort analysis/ (358255)  
 67 ((cohort or case control or follow up or observational or epidemiologic\* or cross sectional) adj (study or studies)).mp. [mp=title, abstract, heading word, drug trade name, original title, device manufacturer, drug manufacturer, device trade name, keyword, floating subheading word] (957938)  
 68 clinical trial/ (967957)  
 69 exp controlled clinical trial/ (675251)  
 70 observational study/ (135359)  
 71 or/60-70 (3179080)  
 72 59 and 71 (11191)  
 73 (MEDLINE or systematic review or literature search).tw. or meta analysis.mp.pt. (357638)  
 74 59 and 73 (2020)  
 75 72 or 74 (12304)  
 76 double-blind:.mp. or placebo:.tw. or blind:.tw. or random\*.ab. (1519420)  
 77 59 and 76 (6499)  
 78 limit 77 to yr="2010 -Current" (3619)  
 79 75 or 78 (13450)  
 80 exp sleep disordered breathing/ (36309)  
 81 sleep apn?ea.mp. (59543)  
 82 hypogonadism/ (14910)  
 83 hypogonadism.mp. (22352)  
 84 ((testosterone or androgen) adj2 (deficiency or deprivation)).mp. (17718)  
 85 OPIAD.mp. (14)  
 86 androgen deficiency/ (2706)  
 87 or/80-86 (106886)  
 88 59 and 87 (599)  
 89 79 or 88 (13856)

## PsycInfo

Database: PsycINFO <1806 to March Week 4 2018> via OVID

### Search Strategy:

-----

- 1 (chronic adj4 pain\*).mp. [mp=title, abstract, heading word, table of contents, key concepts, original title, tests & measures] (19944)
- 2 chronic pain/ (12078)
- 3 exp arthritis/ (3853)



- 4 osteoarthritis.mp. (1758)
- 5 osteo-arthritis.mp. (8)
- 6 degenerative arthritis.mp. (15)
- 7 exp neuralgia/ (892)
- 8 exp neuropathy/ (5931)
- 9 (neuropath\* adj5 (pain\* or diabet\*)).mp. (6256)
- 10 neuralg\*.mp. (1530)
- 11 zoster.mp. (550)
- 12 irritable bowel syndrome/ (1055)
- 13 (IBS or irritable colon or irritable bowel).mp. [mp=title, abstract, heading word, table of contents, key concepts, original title, tests & measures] (1832)
- 14 migraine headache/ (8772)
- 15 migraine.mp. (11715)
- 16 fibromyalgia/ (1768)
- 17 fibromyalg\*.mp. (3042)
- 18 complex regional pain syndromes.mp. (55)
- 19 "complex regional pain syndrome (type i)"/ (137)
- 20 (complex regional pain syndromes or causalgia).mp. (109)
- 21 somatosensory disorders/ (1266)
- 22 hyperalgesi\*.mp. (3914)
- 23 somatoform pain disorder/ (801)
- 24 somatoform disorders/ (7528)
- 25 conversion disorder/ (998)
- 26 ((noncancer\* or non-cancer\* or chronic\* or recurrent or persist\* or non-malign\*) adj3 pain).mp. (3008)
- 27 or/1-26 (58879)
- 28 back pain.mp. or exp Back Pain/ (5353)
- 29 radiculopathy.mp. (202)
- 30 musculoskeletal pain.mp. (1410)
- 31 Arthralgia.mp. (105)
- 32 headache.mp. or exp HEADACHE/ (19164)
- 33 ((TMJ or TMJD) and pain\*).mp. (142)
- 34 WHIPLASH/ or whiplash.mp. (571)
- 35 (backache\* or backpain\* or dorsalgia\* or arthralgia\* or polyarthralgia\* or arthrodyni\* or myalgia\* or fibromyalgia\* or myodyn\* or neuralgia\* or ischialgia\* or crps or rachialgia\*).ab,ti. (5452)
- 36 ((back or discogen\* or bone or musculoskelet\* or muscle\* or skelet\* or spinal or spine or vertebra\* or joint\* or arthritis or Intestin\* or neuropath\* or neck or cervical\* or head or facial\* or complex or radicular or cervicobrachi\* or orofacial or somatic or shoulder\* or knee\* or hip or hips) adj3 pain).mp. (18302)
- 37 or/28-36 (39808)
- 38 (acute or emergency or preoperative or postoperative).ti,ab. (111436)
- 39 37 not 38 (35095)
- 40 27 or 39 (71492)
- 41 exp opiates/ (22978)
- 42 (opioid\* or opiate\*).mp. (27750)
- 43 (alfentanil or alphaprodine or beta-casomorphin\$ or buprenorphine or carfentanil or codeine or deltorphin or dextromethorphan or dezocine or dihydrocodeine or dihydromorphine or enkephalin\$ or ethylketocyclazocine or ethylmorphine or etorphine or fentanyl or heroin or hydrocodone or hydromorphone or ketobemidone or levorphanol or lofentanil or meperidine or meptazinol or methadone or methadyl acetate or morphine or nalbuphine or opium or oxycodone or oxymorphone or pentazocine or phenazocine or phenoperidine or piritramide or promedol or propoxyphene or remifentanil or sufentanil or tilidine or tapentadol).mp. (27830)
- 44 exp narcotic drugs/ (27031)
- 45 narcotic\*.mp. (5729)

46 (adolonta or Anpec or Ardinex or Asimadoline or Alvimopam or amadol or biodalgic or biokanol or Codinovo or contramal or Demerol or Dicodid or Dihydrocodeinone or dihydromorphinone or dihydrohydroxycodone or dihydrone or dilaudid or dinarkon or dolsin or dolosal or dolin or dolantin or dolargan or dolcontral or duramorph or duromorph or duragesic or durogesic or eucodal or Fedotzine or Fentanest or Fentora or Fortral or Hycodan or Hycon or Hydrocodone or Hydrocodeinonebitartrate or hydromorphon or hydroxycodone or isocodeine or isonipecaïn or jutadol or laudacon or l dromoran or levodroman or levorphan or levo-dromoran or levodromoran or lexis or lidol or lydol or morfin or morfine or morphia or morphin or morphinium or morphinene or morphium or ms contin or n-methylmorphine or n methylmorphine or nobligan or numorphan or oramorph or oxycodone or oxiconum or oxycone or oxycontin or palladone or pancodine or pethidine or phentanyl or prontosfort or robidone or skenan or sublimaze or sulfentanyl or sulfentanil or sufenta or takadol or talwin or theocodin or tramadol or tramadolhameln or tramadol or tramadura or tramagetic or tramagit or tramake or tramal or tramex or tramundin or trasedal or theradol or tiral or topalgic or tradol or tradolpuren or tradonal or tralgiol or tramadorsch or tramadin or tramadoc or ultram or zamudol or zumalgic or zydol or zytram).mp. (928)

47 or/41-46 (47945)

48 37 and 47 (2028)

49 animals/ not humans/ (7067)

50 animal models/ (29760)

51 animal research/ (368)

52 exp rodents/ (201732)

53 (rat or rats or mouse or mice).ti. (110418)

54 or/49-53 (226624)

55 48 not 54 (1547)

#### **Database: AMED (Allied and Complementary Medicine) <1985 to May 2018> via OVID**

#### **Search Strategy:**

1 analgesics opioid/ (335)

2 (opioid\* or opiate\*).mp. (1449)

3 (alfentanil or alphaprodine or beta-casomorphin\$ or buprenorphine or carfentanil or codeine or dextorphan or dextromethorphan or dezocine or dihydrocodeine or dihydromorphine or enkephalin\$ or ethylketocyclazocine or ethylmorphine or etorphine or fentanyl or heroin or hydrocodone or hydromorphone or ketobemidone or levorphanol or lofentanil or meperidine or meptazinol or methadone or methadyl acetate or morphine or nalbuphine or opium or oxycodone or oxymorphone or pentazocine or phenazocine or phenoperidine or piritramide or promedol or propoxyphene or remifentanil or sufentanil or tilidine or tapentadol).mp. [mp=abstract, heading words, title] (1097)

4 narcotics/ (177)

5 narcotic\*.mp. (345)

6 (adolonta or Anpec or Ardinex or Asimadoline or Alvimopam or amadol or biodalgic or biokanol or Codinovo or contramal or Demerol or Dicodid or Dihydrocodeinone or dihydromorphinone or dihydrohydroxycodone or dihydrone or dilaudid or dinarkon or dolsin or dolosal or dolin or dolantin or dolargan or dolcontral or duramorph or duromorph or duragesic or durogesic or eucodal or Fedotzine or Fentanest or Fentora or Fortral or Hycodan or Hycon or Hydrocodone or Hydrocodeinonebitartrate or hydromorphon or hydroxycodone or isocodeine or isonipecaïn or jutadol or laudacon or l dromoran or levodroman or levorphan or levo-dromoran or levodromoran or lexis or lidol or lydol or morfin or morfine or morphia or morphin or morphinium or morphinene or morphium or ms contin or n-methylmorphine or n methylmorphine or nobligan or numorphan or oramorph or oxycodone or oxiconum or oxycone or oxycontin or palladone or pancodine or pethidine or phentanyl or prontosfort or robidone or skenan or sublimaze or sulfentanyl or sulfentanil or sufenta or takadol or talwin or theocodin or tramadol or tramadolhameln or tramadol or tramadura or tramagetic or tramagit or tramake or tramal or tramex or tramundin or trasedal or theradol or tiral or topalgic or tradol or tradolpuren or tradonal or tralgiol or tramadorsch or tramadin or tramadoc or ultram or zamudol or zumalgic or zydol or zytram).mp. [mp=abstract, heading words, title] (109)

7 or/1-6 (2268)

- 8 (chronic adj4 pain).mp. [mp=abstract, heading words, title] (4640)
- 9 exp arthritis/ (5636)
- 10 arthralgia/ (189)
- 11 fibromyalgia/ (1656)
- 12 neuralgia/ (157)
- 13 diabetic neuropathies/ (264)
- 14 (neuropath\* adj5 (pain\* or diabet\*)).mp. (981)
- 15 neuralg\*.mp. [mp=abstract, heading words, title] (335)
- 16 osteoarthritis\*.mp. [mp=abstract, heading words, title] (3321)
- 17 irritable bowel syndrome/ (133)
- 18 (IBS or irritable colon or irritable bowel).mp. [mp=abstract, heading words, title] (297)
- 19 fibromyalg\*.mp. [mp=abstract, heading words, title] (1846)
- 20 Migraine/ or migraine.mp. (651)
- 21 complex regional pain syndromes/ or reflex sympathetic dystrophy/ (188)
- 22 (complex regional pain syndromes or causalgia).mp. [mp=abstract, heading words, title] (77)
- 23 pain intractable/ (431)
- 24 hyperalgesia/ or phantom limb/ (181)
- 25 ((noncancer\* or non-cancer\* or chronic\* or recurrent or persist\* or non-malign\*) adj3 pain).mp. [mp=abstract, heading words, title] (675)
- 26 or/8-25 (15230)
- 27 exp backache/ (6186)
- 28 radiculopathy.mp. (290)
- 29 exp Headache/ or headache.mp. (1709)
- 30 Temporomandibular joint syndrome/ (67)
- 31 ((TMJ or TMJD) and pain\*).mp. (28)
- 32 Whiplash injuries/ or whiplash.mp. (594)
- 33 repetition strain injury/ (312)
- 34 (backache\* or backpain\* or dorsalg\* or arthralgi\* or polyarthralgi\* or arthrodyni\* or myalgi\* or fibromyalgi\* or myodyn\* or neuralgi\* or ischialgi\* or crps or rachialgi\*).ab,ti. (2429)
- 35 ((back or discogen\* or bone or musculoskelet\* or muscle\* or skelet\* or spinal or spine or vertebra\* or joint\* or arthritis or Intestin\* or neuropath\* or neck or cervical\* or head or facial\* or complex or radicular or cervicobrachi\* or orofacial or somatic or shoulder\* or knee\* or hip or hips) adj3 pain).mp. (12871)
- 36 or/27-35 (17684)
- 37 (acute or emergency or preoperative or postoperative).ti,ab. (12782)
- 38 36 not 37 (16319)
- 39 26 or 38 (25280)
- 40 7 and 39 (532)
- 41 (rat or rats or mouse or mice).ti. (5925)
- 42 animals/ not humans/ (7083)
- 43 exp Rodents/ (8142)
- 44 41 or 42 or 43 (10161)
- 45 40 not 44 (512)

#### **CINAHL via EBSCO**

- S97 S88 OR S96  
 S96 S52 AND S95  
 S95 S89 OR S90 OR S91 OR S92 OR S93 OR S94  
 S94 ((testosterone or androgen) and (deprivation or deficiency)).  
 S93 (MH "Hypogonadism") OR "hypogonadism"

S92 "sleep-disordered breathing"  
 S91 "sleep apnoea"  
 S90 "sleep apnea"  
 S89 (MH "Sleep Apnea Syndromes+")  
 S88 S63 OR S87  
 S87 S8 Limiters - Published Date: 20100101-20161231  
 Search modes - Boolean/Phrase  
 S86 S52 AND S85  
 S85 S83 NOT S84  
 S84 (MH "Animals+")  
 S83 S70 OR S75 OR S82  
 S82 S76 OR S77 OR S78 OR S79 OR S80 OR S81  
 S81 (MH "Prospective Studies+")  
 S80 (MH "Evaluation Research+")  
 S79 (MH "Comparative Studies")  
 S78 "latin square"  
 S77 (MH "Study Design") OR (MH "Crossover Design") OR (MH "Experimental Studies+")  
 S76 (MH "Random Sample+")  
 S75 S71 OR S72 OR S73 OR S74  
 S74 "random\*"  
 S73 "placebo\*"  
 S72 (MH "Placebos")  
 S71 (MH "Placebo Effect")  
 S70 S64 OR S65 OR S66 OR S67 OR S68 OR S69  
 S69 "triple-blind"  
 S68 "single-blind"  
 S67 "double-blind"  
 S66 clinical W3 trial  
 S65 "randomi?ed controlled trial\*"  
 S64 (MH "Clinical Trials+")  
 S63 S54 OR S62  
 S62 S52 AND S61  
 S61 S55 OR S56 OR S57 OR S58 OR S59 OR S60  
 S60 (observational N2 (study or studies))  
 S59 (cohort N2 (study or studies))  
 S58 (MH "Cross Sectional Studies")  
 S57 (MH "Correlational Studies")  
 S56 (MH "Case Control Studies+")  
 S55 (MH "Prospective Studies+")  
 S54 S52 AND S53  
 S53 ((TI meta analys\* or AB meta analys\* or MW meta analy\*) or (TI systematic review or AB systematic review or PT systematic review))  
 S52 S43 AND S51  
 S51 S44 OR S45 OR S46 OR S47 OR S48 OR S49 OR S50  
 S50 adolonta or Anpec or Ardinex or Asimadoline or Alvimopam or amadol or biodalgic or biokanol or Codinovo or contramal or Demerol or Dicodeid or Dihydrocodeinone or dihydromorphinone or dihydrohydroxycodineone or dihydrone or dilaudid or dinarkon or dolsin or dolosal or dolin or dolantin or dolargan or dolcontral or duramorph or

duromorph or duragesic or durogesic or eucodal or Fedotzine or Fentanest or Fentora or Fortral or Hycodan or Hycon or Hydrocodone or Hydrocodeinonebitartrate or hydromorphon or hydroxycodone or isocodeine or isonipecaïn or jutadol or laudacon or l dromoran or levodroman or levorphan or levo-dromoran or levodromoran or lexiir or lidol or lydol or morfin or morfine or morphia or morphin or morphinium or morphinene or morphium or ms contin or n-methylmorphine or n methylmorphine or nobligan or numorphan or oramorph or oxycodone or oxiconum or oxycone or oxycontin or palladone or pancodine or pethidine or phentanyl or prontosfort or robidone or skenan or sublimaze or sulfentanyl or sulfentanil or sufenta or takadol or talwin or theocodin or tramadol or tramadolhameln or tramadololor or tramadura or tramagetic or tramagit or tramake or tramal or tramex or tramundin or trasedal or theradol or tiral or topalgic or tradol or tradolpuren or tradonal or tralgiol or tramadorsch or tramadin or tramadoc or ultram or zamudol or zumalgic or zydol or zytram

S49 alfentanil or alphaprodine or beta-casomorphin\$ or buprenorphine or carfentanil or codeine or deltorphin or dextromethorphan or dezocine or dihydrocodeine or dihydromorphine or enkephalin\$ or ethylketocyclazocine or ethylmorphine or etorphine or fentanyl or heroin or hydrocodone or hydromorphone or ketobemidone or levorphanol or lofentanil or meperidine or meptazinol or methadone or methadyl acetate or morphine or nalbuphine or opium or oxycodone or oxymorphone or pentazocine or phenazocine or phenoperidine or pirinitramide or promedol or propoxyphene or remifentanil or sufentanil or tilidine or tapentadol

S48 "narcotic\*"

S47 (MH "Narcotics+")

S46 "opiate\*"

S45 "opioid\*"

S44 (MH "Analgesics, Opioid+")

S43 S26 OR S42

S42 S40 NOT S41

S41 acute or emergency or preoperative or postoperative

S40 S27 OR S28 OR S29 OR S30 OR S31 OR S32 OR S33 OR S34 OR S35 OR S36 OR S37 OR S38 OR S39

S39 ((back or discogen\* or bone or musculoskelet\* or muscle\* or skelet\* or spinal or spine or vertebra\* or joint\* or arthritis or Intestin\* or neuropath\* or neck or cervical\* or head or facial\* or complex or radicular or cervicobrachi\* or orofacial or somatic or shoulder\* or knee\* or hip or hips) N3 pain)

S38 backache\* or backpain\* or dorsalg\* or arthralgi\* or polyarthralgi\* or arthrodyni\* or myalgi\* or fibromyalgi\* or myodyni\* or neuralgi\* or ischialgi\* or crps or rachialgi\*

S37 (MH "Peripheral Nervous System+/DE")

S36 (MH "Cumulative Trauma Disorders+")

S35 (MH "Whiplash Injuries") OR "whiplash"

S34 ((TMJ or TMJD) and pain\*)

S33 (MH "Temporomandibular Joint Syndrome")

S32 "headache\*"

S31 (MH "Headache")

S30 (MH "Arthralgia+")

S29 "musculoskeletal pain"

S28 (MH "Radiculopathy") OR "radiculopathy"

S27 (MH "Back Pain+")

S26 S1 OR S2 OR S3 OR S4 OR S5 OR S6 OR S7 OR S8 OR S9 OR S10 OR S11 OR S12 OR S13 OR S14 OR S15 OR S16 OR S17 OR S18 OR S19 OR S20 OR S21 OR S22 OR S23 OR S24 OR S25

S25 ((noncancer\* or non-cancer\* or chronic\* or recurrent or persist\* or non-malign\*) N3 pain)

S24 (MH "Hyperalgesia")

S23 (MH "Phantom Limb") OR (MH "Phantom Pain")

S22 "intractable pain"

S21 "causalgia"  
 S20 (MH "Complex Regional Pain Syndromes+")  
 S19 "fibromyalg\*"  
 S18 (MH "Fibromyalgia")  
 S17 "migraine"  
 S16 (MH "Migraine")  
 S15 "IBS"  
 S14 (irritable (bowel or colon))  
 S13 (MH "Irritable Bowel Syndrome")  
 S12 "zoster"  
 S11 "neuralg\*"  
 S10 (neuropath\* N5 (pain\* or diabet\*))  
 S9 (MH "Diabetic Neuropathies")  
 S8 (MH "Neuralgia+")  
 S7 (MH "Arthritis, Rheumatoid+")  
 S6 "degenerative arthrit\*"  
 S5 "osteo-arthritis"  
 S4 "osteoarthrit\*"  
 S3 (MH "Osteoarthritis+")  
 S2 chronic N4 pain  
 S1 (MH "Chronic Pain")

**Central (Cochrane Library via Wiley)**

**Search Name:**

**Date Run:** 01/04/18 23:42:22.741

**Description:**

| ID  | Search                                                        | Hits  |
|-----|---------------------------------------------------------------|-------|
| #1  | chronic near/3 pain                                           | 9973  |
| #2  | MeSH descriptor: [Chronic Pain] explode all trees             | 1178  |
| #3  | MeSH descriptor: [Osteoarthritis] explode all trees           | 4754  |
| #4  | osteoarthrit*                                                 | 10561 |
| #5  | osteo-arthritis                                               | 69    |
| #6  | degenerative arthrit*                                         | 359   |
| #7  | MeSH descriptor: [Arthritis, Rheumatoid] explode all trees    | 4858  |
| #8  | MeSH descriptor: [Neuralgia] explode all trees                | 1049  |
| #9  | MeSH descriptor: [Diabetic Neuropathies] explode all trees    | 1397  |
| #10 | neuropath* near/5 (pain* or diabet*)                          | 4465  |
| #11 | neuralg*                                                      | 1913  |
| #12 | zoster                                                        | 1641  |
| #13 | MeSH descriptor: [Irritable Bowel Syndrome] explode all trees | 674   |
| #14 | irritable (colon or bowel)                                    | 2448  |
| #15 | IBS                                                           | 1629  |
| #16 | MeSH descriptor: [Migraine Disorders] explode all trees       | 1959  |
| #17 | migraine                                                      | 4659  |
| #18 | MeSH descriptor: [Fibromyalgia] explode all trees             | 851   |
| #19 | fibromyalg*                                                   | 1987  |

#20 MeSH descriptor: [Complex Regional Pain Syndromes] explode all trees 238

#21 complex regional pain syndromes or causalgia 203

#22 MeSH descriptor: [Pain, Intractable] explode all trees 273

#23 MeSH descriptor: [Phantom Limb] explode all trees 75

#24 MeSH descriptor: [Hyperalgesia] explode all trees 454

#25 ((noncancer\* or non-cancer\* or chronic\* or recurrent or persist\* or non-malign\*) near/3 pain) 2107

#26 #1 or #2 or #3 or #4 or #5 or #6 or #7 or #8 or #9 or #10 or #11 or #12 or #13 or #14 or #15 or #16 or #17 or #18 or #19 or #20 or #21 or #22 or #23 or #24 or #25 40797

#27 MeSH descriptor: [Back Pain] explode all trees 3879

#28 MeSH descriptor: [Radiculopathy] explode all trees 303

#29 MeSH descriptor: [Musculoskeletal Pain] explode all trees 478

#30 MeSH descriptor: [Arthralgia] explode all trees 1313

#31 MeSH descriptor: [Headache Disorders] explode all trees 2415

#32 MeSH descriptor: [Headache] explode all trees 1798

#33 headache\* 26942

#34 MeSH descriptor: [Temporomandibular Joint Dysfunction Syndrome] explode all trees 179

#35 ((TMJ or TMJD) and pain\*) 266

#36 MeSH descriptor: [Whiplash Injuries] explode all trees 208

#37 whiplash 460

#38 MeSH descriptor: [Cumulative Trauma Disorders] explode all trees 668

#39 backache\* or backpain\* or dorsalgi\* or arthralgi\* or polyarthralgi\* or arthrodyni\* or myalgi\* or fibromyalgi\* or myodyn\* or neuralgi\* or ischialgi\* or crps or rachialgi\* 13481

#40 ((back or discogen\* or bone or musculoskelet\* or muscle\* or skelet\* or spinal or spine or vertebra\* or joint\* or arthritis or Intestin\* or neuropath\* or neck or cervical\* or head or facial\* or complex or radicular or cervicobrachi\* or orofacial or somatic or shoulder\* or knee\* or hip or hips) near/3 pain) 28955

#41 radiculopathy 893

#42 #27 or #28 or #29 or #30 or #31 or #32 or #33 or #34 or #35 or #36 or #37 or #38 or #39 or #40 or #41 60275

#43 acute or emergency or preoperative or postoperative 200646

#44 42 not 43 59058

#45 #26 or #44 97623

#46 opioid\* or opiate\* 17932

#47 narcotic\* 6752

#48 MeSH descriptor: [Analgesics, Opioid] explode all trees 6462

#49 MeSH descriptor: [Narcotics] explode all trees 7246

#50 alfentanil or alphaprodine or beta-casomorphin\$ or buprenorphine or carfentanil or codeine or deltorphin or dextromethorphan or dezocine or dihydrocodeine or dihydromorphine or enkephalin\$ or ethylketocyclazocine or ethylmorphine or etorphine or fentanyl or heroin or hydrocodone or hydromorphone or ketobemidone or levorphanol or lofentanil or meperidine or meptazinol or methadone or methadyl acetate or morphine or nalbuphine or opium or oxycodone or oxymorphone or pentazocine or phenazocine or phenoperidine or piritramide or promedol or propoxyphene or remifentanil or sufentanil or tilidine or tapentadol 32420

#51 adolonta or Anpec or Ardinex or Asimadoline or Alvimopam or amadol or biodalgic or biokanol or Codinovo or contramal or Demerol or Dicodid or Dihydrocodeinone or dihydromorphinone or dihydrohydroxycodone or dihydrone or dilaudid or dinarkon or dolsin or dolosal or dolin or dolantin or dolargan or dolcontral or duramorph or duromorph or duragesic or durogesic or eucodal or Fedotzine or Fentanest or Fentora or Fortral or Hycodan or Hycon or Hydrocodone or Hydrocodeinonebitartrate or hydromorphon or hydroxycodone or isocodeine or isonipecain or jutadol or laudacon or l dromoran or levodroman or levorphan or levo-dromoran or levodromoran or lexic or lidol or lydol or morfin or morfine or morphia or morphin or morphinium or morphinene or morphium or ms contin or n-methylmorphine or n methylmorphine or nobligan or numorphan or oramorph or oxycodone or oxiconum or oxycone or oxycontin or palladone or pancodine or pethidine or phentanyl or prontofort or robidone or skenan or sublimaze or sulfentanyl or sulfentanil or sufenta or takadol or talwin or

theocodin or tramadol or tramadolhameln or tramadololor or tramadura or tramagetic or tramagit or tramake or tramal  
or tramex or tramundin or trasedal or theradol or tiral or topalgic or tradol or tradolpuren or tradonal or tralgiol or  
tramadorsch or tramadin or tramadoc or ultram or zamudol or zumalgic or zydol or zytram 5622  
#52 #46 or #47 or #48 or #49 or #50 or #51 42294  
#53 #45 and #52 2656

**PubMed (1 April 2018)**

Search ((chronic pain) AND (opioid OR opiate OR narcotic)) AND (((publisher [sb] OR inprocess[sb] OR  
pubmednotmedline[sb] OR pubstatusaheadofprint)))



## eAppendix 2: Reference List of Eligible Trials

1. Vlok GJ, van Vuren JP. Comparison of a standard ibuprofen treatment regimen with a new ibuprofen/paracetamol/codeine combination in chronic osteo-arthritis. *S Afr Med J*. 1987;Suppl:1, 4-6.
2. Kjaersgaard-Andersen P, Nafei A, Skov O, et al. Codeine plus paracetamol versus paracetamol in longer-term treatment of chronic pain due to osteoarthritis of the hip. A randomised, double-blind, multi-centre study. *Pain*. 1990;43(3):309-318.
3. Moran C. MST Continus tablets and pain control in severe rheumatoid arthritis. *The British journal of clinical research*. 1991;2:1-12.
4. Moulin DE, Iezzi A, Amireh R, Sharpe WK, Boyd D, Merskey H. Randomised trial of oral morphine for chronic non-cancer pain. *Lancet*. 1996;347(8995):143-147.
5. Harati Y, Gooch C, Swenson M, et al. Double-blind randomized trial of tramadol for the treatment of the pain of diabetic neuropathy. *Neurology*. 1998;50(6):1842-1846.
6. Watson CP, Babul N. Efficacy of oxycodone in neuropathic pain: a randomized trial in postherpetic neuralgia. *Neurology*. 1998;50(6):1837-1841.
7. Caldwell JR, Hale ME, Boyd RE, et al. Treatment of osteoarthritis pain with controlled release oxycodone or fixed combination oxycodone plus acetaminophen added to nonsteroidal antiinflammatory drugs: a double blind, randomized, multicenter, placebo controlled trial. *J Rheumatol*. 1999;26(4):862-869.
8. Schnitzer TJ, Kamin M, Olson WH. Tramadol allows reduction of naproxen dose among patients with naproxen-responsive osteoarthritis pain: a randomized, double-blind, placebo-controlled study. *Arthritis Rheum*. 1999;42(7):1370-1377.
9. Sindrup SH, Madsen C, Brosen K, Jensen TS. The effect of tramadol in painful polyneuropathy in relation to serum drug and metabolite levels. *Clin Pharmacol Ther*. 1999;66(6):636-641.
10. Peloso PM, Bellamy N, Bensen W, et al. Double blind randomized placebo control trial of controlled release codeine in the treatment of osteoarthritis of the hip or knee. *J Rheumatol*. 2000;27(3):764-771.
11. Russell IJ, Kamin M, Bennett RM, Schnitzer TJ, Green JA, Katz WA. Efficacy of tramadol in treatment of pain in fibromyalgia. *J Clin Rheumatol*. 2000;6(5):250-257.
12. Schnitzer TJ, Gray WL, Paster RZ, Kamin M. Efficacy of tramadol in treatment of chronic low back pain. *J Rheumatol*. 2000;27(3):772-778.
13. Fleischmann RM, Caldwell JR, Roth SH, Tesser JRP, Olson W, Kamin M. Tramadol for the treatment of joint pain associated with osteoarthritis: A randomized, double-blind, placebo-controlled trial. *Curr Ther Res Clin E*. 2001;62(2):113-128.
14. Huse E, Larbig W, Flor H, Birbaumer N. The effect of opioids on phantom limb pain and cortical reorganization. *Pain*. 2001;90(1-2):47-55.
15. Caldwell JR, Rapoport RJ, Davis JC, et al. Efficacy and safety of a once-daily morphine formulation in chronic, moderate-to-severe osteoarthritis pain: results from a randomized, placebo-controlled, double-blind trial and an open-label extension trial. *J Pain Symptom Manage*. 2002;23(4):278-291.
16. Bennett RM, Kamin M, Karim R, Rosenthal N. Tramadol and acetaminophen combination tablets in the treatment of fibromyalgia pain: a double-blind, randomized, placebo-controlled study. *Am J Med*. 2003;114(7):537-545.
17. Boureau F, Legallicier P, Kabir-Ahmadi M. Tramadol in post-herpetic neuralgia: a randomized, double-blind, placebo-controlled trial. *Pain*. 2003;104(1-2):323-331.
18. Gimbel JS, Richards P, Portenoy RK. Controlled-release oxycodone for pain in diabetic neuropathy: a randomized controlled trial. *Neurology*. 2003;60(6):927-934.
19. Ruoff GE, Rosenthal N, Jordan D, Karim R, Kamin M. Tramadol/acetaminophen combination tablets for the treatment of chronic lower back pain: a multicenter, randomized, double-blind, placebo-controlled outpatient study. *Clin Ther*. 2003;25(4):1123-1141.
20. Babul N, Noveck R, Chipman H, Roth SH, Gana T, Albert K. Efficacy and safety of extended-release, once-daily tramadol in chronic pain: a randomized 12-week clinical trial in osteoarthritis of the knee. *J Pain Symptom Manage*. 2004;28(1):59-71.

21. Brunnmuller U, Zeidler H, Alten R, Gromnica-Ihle E. Effective Analgesic Therapy with Tilidine/Naloxone for Patients with Rheumatoid Arthritis. [German]. *Aktuelle Rheumatologie*. 2004;29(1):35-39.
22. Emkey R, Rosenthal N, Wu SC, Jordan D, Kamin M. Efficacy and safety of tramadol/acetaminophen tablets (Ultracet) as add-on therapy for osteoarthritis pain in subjects receiving a COX-2 nonsteroidal antiinflammatory drug: a multicenter, randomized, double-blind, placebo-controlled trial. *J Rheumatol*. 2004;31(1):150-156.
23. Peloso PM, Fortin L, Beaulieu A, Kamin M, Rosenthal N. Analgesic efficacy and safety of tramadol/acetaminophen combination tablets (Ultracet) in treatment of chronic low back pain: a multicenter, outpatient, randomized, double blind, placebo controlled trial. *J Rheumatol*. 2004;31(12):2454-2463.
24. Matsumoto AK, Babul N, Ahdieh H. Oxymorphone extended-release tablets relieve moderate to severe pain and improve physical function in osteoarthritis: results of a randomized, double-blind, placebo- and active-controlled phase III trial. *Pain Med*. 2005;6(5):357-366.
25. Gana TJ, Pascual ML, Fleming RR, et al. Extended-release tramadol in the treatment of osteoarthritis: a multicenter, randomized, double-blind, placebo-controlled clinical trial. *Curr Med Res Opin*. 2006;22(7):1391-1401.
26. Langford R, McKenna F, Ratcliffe S, Vojtassak J, Richarz U. Transdermal fentanyl for improvement of pain and functioning in osteoarthritis: a randomized, placebo-controlled trial. *Arthritis Rheum*. 2006;54(6):1829-1837.
27. Webster LR, Butera PG, Moran LV, Wu N, Burns LH, Friedmann N. Oxytrex minimizes physical dependence while providing effective analgesia: a randomized controlled trial in low back pain. *J Pain*. 2006;7(12):937-946.
28. Burch F, Fishman R, Messina N, et al. A comparison of the analgesic efficacy of Tramadol Contramid OAD versus placebo in patients with pain due to osteoarthritis. *J Pain Symptom Manage*. 2007;34(3):328-338.
29. Freeman R, Raskin P, Hewitt DJ, et al. Randomized study of tramadol/acetaminophen versus placebo in painful diabetic peripheral neuropathy. *Curr Med Res Opin*. 2007;23(1):147-161.
30. Fishman RL, Kistler CJ, Ellerbusch MT, et al. Efficacy and safety of 12 weeks of osteoarthritic pain therapy with once-daily tramadol (Tramadol Contramid OAD). *J Opioid Manag*. 2007;3(5):273-280.
31. Hale ME, Ahdieh H, Ma T, Rauck R. Efficacy and safety of OPANA ER (oxymorphone extended release) for relief of moderate to severe chronic low back pain in opioid-experienced patients: a 12-week, randomized, double-blind, placebo-controlled study. *J Pain*. 2007;8(2):175-184.
32. Katz N, Rauck R, Ahdieh H, et al. A 12-week, randomized, placebo-controlled trial assessing the safety and efficacy of oxymorphone extended release for opioid-naïve patients with chronic low back pain. *Curr Med Res Opin*. 2007;23(1):117-128.
33. Hanna M, O'Brien C, Wilson MC. Prolonged-release oxycodone enhances the effects of existing gabapentin therapy in painful diabetic neuropathy patients. *Eur J Pain*. 2008;12(6):804-813.
34. Ma K, Jiang W, Zhou Q, Du DP. The efficacy of oxycodone for management of acute pain episodes in chronic neck pain patients. *Int J Clin Pract*. 2008;62(2):241-247.
35. Thorne C, Beaulieu AD, Callaghan DJ, et al. A randomized, double-blind, crossover comparison of the efficacy and safety of oral controlled-release tramadol and placebo in patients with painful osteoarthritis. *Pain Res Manag*. 2008;13(2):93-102.
36. Vondrackova D, Leyendecker P, Meissner W, et al. Analgesic efficacy and safety of oxycodone in combination with naloxone as prolonged release tablets in patients with moderate to severe chronic pain. *J Pain*. 2008;9(12):1144-1154.
37. Vorsanger GJ, Xiang J, Gana TJ, Pascual ML, Fleming RR. Extended-release tramadol (tramadol ER) in the treatment of chronic low back pain. *J Opioid Manag*. 2008;4(2):87-97.
38. Norrbrink C, Lundeberg T. Tramadol in neuropathic pain after spinal cord injury: a randomized, double-blind, placebo-controlled trial. *Clin J Pain*. 2009;25(3):177-184.
39. Afilalo M, Etropolski MS, Kuperwasser B, et al. Efficacy and safety of Tapentadol extended release compared with oxycodone controlled release for the management of moderate to severe chronic pain

- related to osteoarthritis of the knee: a randomized, double-blind, placebo- and active-controlled phase III study. *Clin Drug Investig*. 2010;30(8):489-505.
40. Breivik H, Ljosaa TM, Stengaard-Pedersen K, et al. A 6-months, randomised, placebo-controlled evaluation of efficacy and tolerability of a low-dose 7-day buprenorphine transdermal patch in osteoarthritis patients naive to potent opioids. *Scand J Pain*. 2010;1(3):122-141.
  41. Buynak R, Shapiro DY, Okamoto A, et al. Efficacy and safety of tapentadol extended release for the management of chronic low back pain: results of a prospective, randomized, double-blind, placebo- and active-controlled Phase III study. *Expert Opin Pharmacother*. 2010;11(11):1787-1804.
  42. Gordon A, Callaghan D, Spink D, et al. Buprenorphine transdermal system in adults with chronic low back pain: a randomized, double-blind, placebo-controlled crossover study, followed by an open-label extension phase [ISRCTN 06013881]. *Clin Ther*. 2010;32(5):844-860.
  43. Gordon A, Rashiq S, Moulin DE, et al. Buprenorphine transdermal system for opioid therapy in patients with chronic low back pain. *Pain Res Manag*. 2010;15(3):169-178.
  44. Hale M, Khan A, Kutch M, Li S. Once-daily OROS hydromorphone ER compared with placebo in opioid-tolerant patients with chronic low back pain. *Curr Med Res Opin*. 2010;26(6):1505-1518.
  45. Katz N, Hale M, Morris D, Stauffer J. Morphine sulfate and naltrexone hydrochloride extended release capsules in patients with chronic osteoarthritis pain. *Postgrad Med*. 2010;122(4):112-128.
  46. Munera C, Drehobl M, Sessler NE, Landau C. A randomized, placebo-controlled, double-blinded, parallel-group, 5-week study of buprenorphine transdermal system in adults with osteoarthritis. *J Opioid Manag*. 2010;6(3):193-202.
  47. Zin CS, Nissen LM, O'Callaghan JP, Duffull SB, Smith MT, Moore BJ. A randomized, controlled trial of oxycodone versus placebo in patients with postherpetic neuralgia and painful diabetic neuropathy treated with pregabalin. *J Pain*. 2010;11(5):462-471.
  48. Friedmann N, Klutzaritz V, Webster L. Efficacy and safety of an extended-release oxycodone (Remoxy) formulation in patients with moderate to severe osteoarthritic pain. *J Opioid Manag*. 2011;7(3):193-202.
  49. Schwartz S, Etropolis M, Shapiro DY, et al. Safety and efficacy of tapentadol ER in patients with painful diabetic peripheral neuropathy: results of a randomized-withdrawal, placebo-controlled trial. *Curr Med Res Opin*. 2011;27(1):151-162.
  50. Steiner DJ, Sitar S, Wen W, et al. Efficacy and safety of the seven-day buprenorphine transdermal system in opioid-naive patients with moderate to severe chronic low back pain: an enriched, randomized, double-blind, placebo-controlled study. *J Pain Symptom Manage*. 2011;42(6):903-917.
  51. Vojtassak J, Vojtassak J, Jacobs A, Rynn L, Waechter S, Richarz U. A Phase IIIb, Multicentre, Randomised, Parallel-Group, Placebo-Controlled, Double-Blind Study to Investigate the Efficacy and Safety of OROS Hydromorphone in Subjects with Moderate-to-Severe Chronic Pain Induced by Osteoarthritis of the Hip or the Knee. *Pain Res Treat*. 2011;2011:239501.
  52. Chu LF, D'Arcy N, Brady C, et al. Analgesic tolerance without demonstrable opioid-induced hyperalgesia: a double-blinded, randomized, placebo-controlled trial of sustained-release morphine for treatment of chronic nonradicular low-back pain. *Pain*. 2012;153(8):1583-1592.
  53. Sindrup SH, Konder R, Lehmann R, et al. Randomized controlled trial of the combined monoaminergic and opioid investigational compound GRT9906 in painful polyneuropathy. *Eur J Pain*. 2012;16(6):849-859.
  54. Uberall MA, Mueller-Schwefe GH, Terhaag B. Efficacy and safety of flupirtine modified release for the management of moderate to severe chronic low back pain: results of SUPREME, a prospective randomized, double-blind, placebo- and active-controlled parallel-group phase IV study. *Curr Med Res Opin*. 2012;28(10):1617-1634.
  55. Cloutier C, Taliano J, O'Mahony W, et al. Controlled-release oxycodone and naloxone in the treatment of chronic low back pain: a placebo-controlled, randomized study. *Pain Res Manag*. 2013;18(2):75-82.
  56. Lee JH, Lee CS. A randomized, double-blind, placebo-controlled, parallel-group study to evaluate the efficacy and safety of the extended-release tramadol hydrochloride/acetaminophen fixed-dose combination tablet for the treatment of chronic low back pain. *Clin Ther*. 2013;35(11):1830-1840.

57. Rauck R, Rapoport R, Thippawong J. Results of a double-blind, placebo-controlled, fixed-dose assessment of once-daily OROS(R) hydromorphone ER in patients with moderate to severe pain associated with chronic osteoarthritis. *Pain Pract.* 2013;13(1):18-29.
58. Niesters M, Proto PL, Aarts L, Sarton EY, Drewes AM, Dahan A. Tapentadol potentiates descending pain inhibition in chronic pain patients with diabetic polyneuropathy. *Br J Anaesth.* 2014;113(1):148-156.
59. Rauck RL, Nalamachu S, Wild JE, et al. Single-entity hydrocodone extended-release capsules in opioid-tolerant subjects with moderate-to-severe chronic low back pain: a randomized double-blind, placebo-controlled study. *Pain Med.* 2014;15(6):975-985.
60. Vinik AI, Shapiro DY, Rauschkolb C, et al. A randomized withdrawal, placebo-controlled study evaluating the efficacy and tolerability of tapentadol extended release in patients with chronic painful diabetic peripheral neuropathy. *Diabetes Care.* 2014;37(8):2302-2309.
61. Arai T, Kashimoto Y, Ukyo Y, Tominaga Y, Imanaka K. Two placebo-controlled, randomized withdrawal studies to evaluate the fentanyl 1 day patch in opioid-naive patients with chronic pain. *Curr Med Res Opin.* 2015;31(12):2207-2218.
62. Hale ME, Zimmerman TR, Eyal E, Malamut R. Efficacy and safety of a hydrocodone extended-release tablet formulated with abuse-deterrence technology in patients with moderate-to-severe chronic low back pain. *J Opioid Manag.* 2015;11(6):507-518.
63. Katz N, Kopecy EA, O'Connor M, Brown RH, Fleming AB. A phase 3, multicenter, randomized, double-blind, placebo-controlled, safety, tolerability, and efficacy study of Xtampza ER in patients with moderate-to-severe chronic low back pain. *Pain.* 2015;156(12):2458-2467.
64. Rauck RL, Hale ME, Bass A, et al. A randomized double-blind, placebo-controlled efficacy and safety study of ALO-02 (extended-release oxycodone surrounding sequestered naltrexone) for moderate-to-severe chronic low back pain treatment. *Pain.* 2015;156(9):1660-1669.
65. Weil AJ, Masters ET, Barsdorf AI, et al. Patient-reported health-related quality of life, work productivity, and activity impairment during treatment with ALO-02 (extended-release oxycodone and sequestered naltrexone) for moderate-to-severe chronic low back pain. *Health Qual Life Outcomes.* 2017;15(1):202.
66. Trenkwalder C, Chaudhuri KR, Martinez-Martin P, et al. Prolonged-release oxycodone-naloxone for treatment of severe pain in patients with Parkinson's disease (PANDA): a double-blind, randomised, placebo-controlled trial. *Lancet Neurol.* 2015;14(12):1161-1170.
67. Wen W, Sitar S, Lynch SY, He E, Ripa SR. A multicenter, randomized, double-blind, placebo-controlled trial to assess the efficacy and safety of single-entity, once-daily hydrocodone tablets in patients with uncontrolled moderate to severe chronic low back pain. *Expert Opin Pharmacother.* 2015;16(11):1593-1606.
68. Gimbel J, Spierings EL, Katz N, Xiang Q, Tzanis E, Finn A. Efficacy and tolerability of buccal buprenorphine in opioid-experienced patients with moderate to severe chronic low back pain: results of a phase 3, enriched enrollment, randomized withdrawal study. *Pain.* 2016;157(11):2517-2526. Erratum in: *Pain.* 2017 Feb; 2158(2512):2366.
69. Lin JC, Chu LF, Stringer EA, et al. One Month of Oral Morphine Decreases Gray Matter Volume in the Right Amygdala of Individuals with Low Back Pain: Confirmation of Previously Reported Magnetic Resonance Imaging Results. *Pain Med.* 2016;17(8):1497-1504.
70. Mayorga AJ, Wang S, Kelly KM, Thippawong J. Efficacy and safety of fulranumab as monotherapy in patients with moderate to severe, chronic knee pain of primary osteoarthritis: a randomised, placebo- and active-controlled trial. *Int J Clin Pract.* 2016;70(6):493-505.
71. Rauck RL, Potts J, Xiang Q, Tzanis E, Finn A. Efficacy and tolerability of buccal buprenorphine in opioid-naive patients with moderate to severe chronic low back pain. *Postgrad Med.* 2016;128(1):1-11.
72. Simpson RW, Wlodarczyk JH. Transdermal buprenorphine relieves neuropathic pain: A randomized, double-blind, parallel-group, placebo-controlled trial in diabetic peripheral neuropathic pain. *Diabetes Care.* 2016;39(9):1493-1500.
73. Tominaga Y, Koga H, Uchida N, et al. Methodological Issues in Conducting Pilot Trials in Chronic Pain as Randomized, Double-blind, Placebo-controlled Studies. *Drug Res.* 2016;66(7):363-370.

74. Christoph A, Eerdekens MH, Kok M, Volkens G, Freynhagen R. Cebranopadol, a novel first-in-class analgesic drug candidate: first experience in patients with chronic low back pain in a randomized clinical trial. *Pain*. 2017;158(9):1813-1824.
75. Serrie A, Lange B, Steup A. Tapentadol prolonged-release for moderate-to-severe chronic osteoarthritis knee pain: a double-blind, randomized, placebo- and oxycodone controlled release-controlled study. *Curr Med Res Opin*. 2017;33(8):1423-1432.
76. Pavelka Jr K, Peliskova Z, Stehlikova H, Repas C. Comparison of the effectiveness of tramadol and diclofenac in the symptomatic treatment of osteoarthritis. [Czech]. *Ceska Revmatologie*. 1995;3(4):171-176.
77. Jamison RN, Raymond SA, Slawsby EA, Nedeljkovic SS, Katz NP. Opioid therapy for chronic noncancer back pain. A randomized prospective study. *Spine (Phila Pa 1976)*. 1998;23(23):2591-2600.
78. Pavelka K, Peliskova Z, Stehlikova H, Ratcliffe S, Repas C. Intraindividual differences in pain relief and functional improvement in osteoarthritis with diclofenac or tramadol. *Clin Drug Investig*. 1998;16(6):421-429.
79. Beaulieu AD, Peloso PM, Haraoui B, et al. Once-daily, controlled-release tramadol and sustained-release diclofenac relieve chronic pain due to osteoarthritis: a randomized controlled trial. *Pain Res Manag*. 2008;13(2):103-110.
80. Liu GH, Liu JM. Efficacy of oxycodone-acetaminophen on postherpetic neuralgia in patients with zoster. [Chinese]. *Chinese Journal of New Drugs*. 2009;18(8):722-723+740.
81. O'Donnell JB, Ekman EF, Spalding WM, Bhadra P, McCabe D, Berger MF. The effectiveness of a weak opioid medication versus a cyclo-oxygenase-2 (COX-2) selective non-steroidal anti-inflammatory drug in treating flare-up of chronic low-back pain: results from two randomized, double-blind, 6-week studies. *J Int Med Res*. 2009;37(6):1789-1802.
82. Qin L, Jiang F, Hu XQ. Effect of treating fibromyalgia syndrome with the combination of Tramadol and Amitriptyline. *Chinese Journal of Rural Medicine and Pharmacy [zhong Guo Xiang Cun Yi Yao za Zhi]*. 2009;16(3).
83. Kim S, Ryou J, Hur J. Comparison of Effectiveness and Safety of Tramadol/Acetaminophen and Non-steroidal Anti-inflammatory Drugs (NSAIDs) for Treatment of Knee Osteoarthritis in Elderly Patients [Korean]. *Journal of Rheumatic Diseases*. 2012;19(1):25-29.
84. Park KS, Choi JJ, Kim WU, Min JK, Park SH, Cho CS. The efficacy of tramadol/acetaminophen combination tablets (Ultracet(R)) as add-on and maintenance therapy in knee osteoarthritis pain inadequately controlled by nonsteroidal anti-inflammatory drug (NSAID). *Clin Rheumatol*. 2012;31(2):317-323.
85. Tetsunaga T, Tetsunaga T, Tanaka M, Ozaki T. Efficacy of tramadol-acetaminophen tablets in low back pain patients with depression. *J Orthop Sci*. 2015;20(2):281-286.
86. Ko SH, Kwon HS, Yu JM, et al. Comparison of the efficacy and safety of tramadol/acetaminophen combination therapy and gabapentin in the treatment of painful diabetic neuropathy. *Diabet Med*. 2010;27(9):1033-1040.
87. Sakai Y, Ito K, Hida T, Ito S, Harada A. Pharmacological management of chronic low back pain in older patients: a randomized controlled trial of the effect of pregabalin and opioid administration. *Eur Spine J*. 2015;24(6):1309-1317.
88. Frank B, Serpell MG, Hughes J, Matthews JN, Kapur D. Comparison of analgesic effects and patient tolerability of nabilone and dihydrocodeine for chronic neuropathic pain: randomised, crossover, double blind study. *BMJ*. 2008;336(7637):199-201.
89. Raja SN, Haythornthwaite JA, Pappagallo M, et al. Opioids versus antidepressants in postherpetic neuralgia: a randomized, placebo-controlled trial. *Neurology*. 2002;59(7):1015-1021.
90. Khoromi S, Cui L, Nackers L, Max MB. Morphine, nortriptyline and their combination vs. placebo in patients with chronic lumbar root pain. *Pain*. 2007;130(1-2):66-75.
91. Gilron I, Tu D, Holden RR, Jackson AC, DuMerton-Shore D. Combination of morphine with nortriptyline for neuropathic pain. *Pain*. 2015;156(8):1440-1448.

92. Gilron I, Bailey JM, Tu D, Holden RR, Weaver DF, Houlden RL. Morphine, gabapentin, or their combination for neuropathic pain. *N Engl J Med*. 2005;352(13):1324-1334.
93. DeLemos BP, Xiang J, Benson C, et al. Tramadol hydrochloride extended-release once-daily in the treatment of osteoarthritis of the knee and/or hip: a double-blind, randomized, dose-ranging trial. *Am J Ther*. 2011;18(3):216-226.
94. Corsinovi L, Martinelli E, Fonte G, et al. Efficacy of oxycodone/acetaminophen and codeine/acetaminophen vs. conventional therapy in elderly women with persistent, moderate to severe osteoarthritis-related pain. *Arch Gerontol Geriatr*. 2009;49(3):378-382.

**eTable 1: Conversion factors for opioids<sup>a</sup>**

| <b>Oral formulations</b>        |                                                       |                                              |
|---------------------------------|-------------------------------------------------------|----------------------------------------------|
| <i>Opioid</i>                   | <i>Conversion factor for oral morphine equivalent</i> |                                              |
| Codeine <sup>b</sup>            | 0.1 to 0.2                                            |                                              |
| Dihydrocodeine                  | 0.1                                                   |                                              |
| Hydrocodone <sup>b</sup>        | 1.0 to 1.5                                            |                                              |
| Hydromorphone                   | 5.0                                                   |                                              |
| Meperidine                      | 0.1                                                   |                                              |
| Morphine                        | 1.0                                                   |                                              |
| Oxycodone                       | 1.5                                                   |                                              |
| Oxymorphone                     | 3.0                                                   |                                              |
| Tapentadol <sup>b</sup>         | 0.3 to 0.4                                            |                                              |
| Tramadol <sup>b</sup>           | 0.1 to 0.2                                            |                                              |
| <b>Transdermal formulations</b> |                                                       |                                              |
| <i>Opioid</i>                   | <i>Hourly dose in micrograms</i>                      | <i>Mean morphine equivalent dose (range)</i> |
| Fentanyl                        | 25 mcg/hr                                             | 97 mg/day (60 to 134)                        |
| Fentanyl                        | 37 mcg/hr                                             | 157 mg/day (135 to 179)                      |
| Fentanyl                        | 50 mcg/hr                                             | 202 mg/day (180 to 224)                      |
| Fentanyl                        | 62 mcg/hr                                             | 247 mg/day (225 to 269)                      |
| Fentanyl                        | 75 mcg/hr                                             | 292 mg/day (270 to 314)                      |
| Fentanyl                        | 87 mcg/hr                                             | 337 mg/day (315 to 359)                      |
| Fentanyl                        | 100 mcg/hr                                            | 382 mg/day (360 to 404)                      |

<sup>a</sup> These factors are for calculation purposes only and should not be used in isolation to calculate clinical equivalencies for dosing patients.

<sup>b</sup> For opioids in which a range of conversion factors was reported, we used the average of the range (e.g. 0.15 for Codeine)

**eTable 2: Criteria for assessing the credibility of significant subgroup effects**

1. Is the subgroup variable a characteristic measured at baseline or after randomization?
2. Is the effect suggested by comparisons within rather than between studies?
3. Was the hypothesis specified a priori?
4. Was the direction of the subgroup effect specified a priori?
5. Was the subgroup effect one of a small number of hypothesized effects tested?
6. Does the interaction test suggest a low likelihood that chance explains the apparent subgroup effect?
7. Is the significant subgroup effect independent?
8. Is the size of the subgroup effect large?
9. Is the interaction consistent across studies?
10. Is the interaction consistent across closely related outcomes within the study?
11. Is there indirect evidence that supports the hypothesized interaction (biological rationale)?



**eTable 3: Characteristics of 96 eligible randomized clinical trials**

| First Author                        | Year | Total patients randomized | Clinical condition(s)           | Duration of chronic pain (months) |             | Age (years) |             | Female sex | No. of study arms | Interventions                       |                |
|-------------------------------------|------|---------------------------|---------------------------------|-----------------------------------|-------------|-------------|-------------|------------|-------------------|-------------------------------------|----------------|
|                                     |      |                           |                                 | Mean/median                       | SD or Range | Mean/median | SD or Range | No. (%)    |                   | Opioid(s)                           | Control        |
| <b>Opioids vs placebo (76 RCTs)</b> |      |                           |                                 |                                   |             |             |             |            |                   |                                     |                |
| Vlok <sup>1</sup>                   | 1987 | 31                        | Osteoarthritis                  | NR                                | NR          | 59.2        | NR          | 26 (84)    | 2                 | Codeine + Acetaminophen+ Ibuprofen  | Ibuprofen      |
| Kjaersgaard-Andersen <sup>2</sup>   | 1990 | 158                       | Osteoarthritis                  | NR                                | NR          | 66.5        | NR          | 72 (46)    | 2                 | Codeine + Acetaminophen             | Acetaminophen  |
| Moran <sup>3</sup>                  | 1991 | 10 <sup>a</sup>           | Rheumatoid arthritis            | NR                                | NR          | NR          | NR          | 1 (5)      | 2                 | Morphine                            | Placebo        |
| Moulin <sup>4</sup>                 | 1996 | 61 <sup>a</sup>           | Chronic post-traumatic pain nos | 40.8                              | 9 to 252    | 40.4        | NR          | 36 (59)    | 2                 | Morphine                            | Active placebo |
| Harati <sup>5</sup>                 | 1998 | 131                       | Painful diabetic neuropathy     | NR                                | NR          | 59          | NR          | 53 (40)    | 2                 | Tramadol                            | Placebo        |
| Watson <sup>6</sup>                 | 1998 | 50 <sup>a</sup>           | Postherpetic neuralgia          | 31                                | 29          | 70          | 11          | 22 (44)    | 2                 | Oxycodone                           | Placebo        |
| Caldwell <sup>7</sup>               | 1999 | 107                       | Osteoarthritis                  | NR                                | NR          | 56.7        | NR          | 67 (62)    | 3                 | Oxycodone; Oxycodone+ Acetaminophen | Placebo        |

**eTable 3: Characteristics of 96 eligible randomized clinical trials**

| First Author              | Year | Total patients randomized | Clinical condition(s)  | Duration of chronic pain (months) |             | Age (years) |             | Female sex | No. of study arms | Interventions            |                    |
|---------------------------|------|---------------------------|------------------------|-----------------------------------|-------------|-------------|-------------|------------|-------------------|--------------------------|--------------------|
|                           |      |                           |                        | Mean/median                       | SD or Range | Mean/median | SD or Range | No. (%)    |                   | Opioid(s)                | Control            |
| Schnitzer <sup>8</sup>    | 1999 | 240                       | Osteoarthritis         | NR                                | NR          | NR          | NR          | 147 (61)   | 2                 | Tramadol + Naproxen      | Naproxen           |
| Sindrup <sup>9</sup>      | 1999 | 45 <sup>a</sup>           | Painful polyneuropathy | 36                                | 6 to 132    | 57          | NR          | 11 (24)    | 2                 | Tramadol                 | Placebo            |
| Peloso <sup>10</sup>      | 2000 | 103                       | Osteoarthritis         | NR                                | NR          | 61.6        | 11.2        | 41 (40)    | 2                 | Codeine                  | Placebo            |
| Russell <sup>11</sup>     | 2000 | 69                        | Fibromyalgia           | NR                                | NR          | NR          | NR          | 65 (94)    | 2                 | Tramadol                 | Placebo            |
| Schnitzer <sup>12</sup>   | 2000 | 254                       | Low back pain nos      | NR                                | NR          | 47.1        | 12.9        | 127 (50)   | 2                 | Tramadol + Naproxen      | Placebo + Naproxen |
| Fleischmann <sup>13</sup> | 2001 | 129                       | Osteoarthritis         | 7.9                               | 6.6         | 62.5        | 9.2         | 80 (62)    | 2                 | Tramadol                 | Placebo            |
| Huse <sup>14</sup>        | 2001 | 12 <sup>a</sup>           | Phantom limb pain      | NR                                | NR          | 50.6        | 14          | 2 (17)     | 2                 | Morphine                 | Placebo            |
| Caldwell <sup>15</sup>    | 2002 | 295                       | Osteoarthritis         | NR                                | NR          | 62.4        | 10.4        | 184 (62)   | 4                 | Morphine (three doses)   | Placebo            |
| Bennett <sup>16</sup>     | 2003 | 315                       | Fibromyalgia           | NR                                | NR          | 50          | 10.5        | 294 (93)   | 2                 | Tramadol + Acetaminophen | Placebo            |
| Boureau <sup>17</sup>     | 2003 | 127                       | Postherpetic neuralgia | 6.9                               | 2.9         | 66.8        | 11.8        | 77 (61)    | 2                 | Tramadol                 | Placebo            |

**eTable 3: Characteristics of 96 eligible randomized clinical trials**

| First Author              | Year | Total patients randomized | Clinical condition(s)       | Duration of chronic pain (months) |             | Age (years) |             | Female sex | No. of study arms | Interventions                      |         |
|---------------------------|------|---------------------------|-----------------------------|-----------------------------------|-------------|-------------|-------------|------------|-------------------|------------------------------------|---------|
|                           |      |                           |                             | Mean/median                       | SD or Range | Mean/median | SD or Range | No. (%)    |                   | Opioid(s)                          | Control |
| Gimbel <sup>18</sup>      | 2003 | 159                       | Painful diabetic neuropathy | NR                                | NR          | 58.9        | 11.3        | 76 (48)    | 2                 | Oxycodone                          | Placebo |
| Ruoff <sup>19</sup>       | 2003 | 322                       | Low back pain nos           | NR                                | NR          | 53.9        | 12          | 201 (62)   | 2                 | Tramadol + Acetaminophen           | Placebo |
| Babul <sup>20</sup>       | 2004 | 246                       | Osteoarthritis              | 154.8                             | 126         | 61.4        | 10.1        | 151 (61)   | 2                 | Tramadol                           | Placebo |
| Brunnmuller <sup>21</sup> | 2004 | 20                        | Rheumatoid arthritis        | NR                                | NR          | 57          | NR          | 13 (65)    | 2                 | Tilidine + Naloxone                | Placebo |
| Emkey <sup>22</sup>       | 2004 | 307                       | Osteoarthritis              | NR                                | NR          | 61          | 9           | 209 (68)   | 2                 | Tramadol + Acetaminophen           | Placebo |
| Peloso <sup>23</sup>      | 2004 | 338                       | Low back pain nos           | NR                                | NR          | 57.5        | 12.5        | 210 (62)   | 2                 | Tramadol + Acetaminophen           | Placebo |
| Matsumoto <sup>24</sup>   | 2005 | 491                       | Osteoarthritis              | NR                                | ≥3          | 62.3        | 1           | 297 (60)   | 4                 | Oxymorphone (two doses); Oxycodone | Placebo |
| Gana <sup>25</sup>        | 2006 | 1020                      | Osteoarthritis              | NR                                | NR          | 58.2        | 9.9         | 631 (62)   | 5                 | Tramadol (four doses)              | Placebo |

**eTable 3: Characteristics of 96 eligible randomized clinical trials**

| First Author           | Year | Total patients randomized | Clinical condition(s)       | Duration of chronic pain (months) |             | Age (years) |             | Female sex | No. of study arms | Interventions                  |                      |
|------------------------|------|---------------------------|-----------------------------|-----------------------------------|-------------|-------------|-------------|------------|-------------------|--------------------------------|----------------------|
|                        |      |                           |                             | Mean/median                       | SD or Range | Mean/median | SD or Range | No. (%)    |                   | Opioid(s)                      | Control              |
| Langford <sup>26</sup> | 2006 | 399                       | Osteoarthritis              | NR                                | ≥3          | 63          | 0.7         | 265 (67)   | 2                 | Fentanyl                       | Placebo              |
| Webster <sup>27</sup>  | 2006 | 719                       | Low back pain nos           | NR                                | NR          | 48.1        | NR          | 442 (61)   | 4                 | Oxycodone; Oxytrex (two doses) | Placebo              |
| Burch <sup>28</sup>    | 2007 | 646                       | Osteoarthritis              | NR                                | NR          | 62          | 9           | 408 (63)   | 2                 | Tramadol                       | Placebo              |
| Freeman <sup>29</sup>  | 2007 | 313                       | Painful diabetic neuropathy | NR                                | NR          | 55.7        | 10.3        | 128(41)    | 2                 | Tramadol + Acetaminophen       | Placebo              |
| Fishman <sup>30</sup>  | 2007 | 552                       | Osteoarthritis              | NR                                | NR          | 61.19       | 9.22        | 333 (62)   | 4                 | Tramadol (three doses)         | Placebo              |
| Hale <sup>31</sup>     | 2007 | 143                       | Low back pain nos           | NR                                | NR          | 47.1        | 11.5        | 64 (45)    | 2                 | Oxymorphone                    | Placebo              |
| Katz <sup>32</sup>     | 2007 | 205                       | Low back pain nos           | NR                                | NR          | 49.7        | 13.2        | 109 (53)   | 2                 | Oxymorphone                    | Placebo              |
| Hanna <sup>33</sup>    | 2008 | 338                       | Painful diabetic neuropathy | NR                                | NR          | 60.2        | 10.2        | 118 (35)   | 2                 | Oxycodone + Gabapentin         | Placebo + Gabapentin |
| Ma <sup>34</sup>       | 2008 | 116                       | Chronic neck pain nos       | NR                                | NR          | 55.7        | 14.5        | 44 (38)    | 2                 | Oxycodone                      | Placebo              |
| Thorne <sup>35</sup>   | 2008 | 100 <sup>a</sup>          | Osteoarthritis              | NR                                | 81.6        | 61          | 10.3        | 55 (55)    | 2                 | Tramadol                       | Placebo              |

**eTable 3: Characteristics of 96 eligible randomized clinical trials**

| First Author                         | Year | Total patients randomized | Clinical condition(s)    | Duration of chronic pain (months) |             | Age (years) |             | Female sex | No. of study arms | Interventions                         |         |
|--------------------------------------|------|---------------------------|--------------------------|-----------------------------------|-------------|-------------|-------------|------------|-------------------|---------------------------------------|---------|
|                                      |      |                           |                          | Mean/median                       | SD or Range | Mean/median | SD or Range | No. (%)    |                   | Opioid(s)                             | Control |
| Vondrackova <sup>36</sup>            | 2008 | 464                       | Low back pain nos        | NR                                | NR          | 56.3        | 11          | 285 (61)   | 3                 | Oxycodone alone; Oxycodone + Naloxone | Placebo |
| Vorsanger <sup>37</sup>              | 2008 | 386                       | Low back pain nos        | NR                                | NR          | 47.8        | 14.3        | 192 (50)   | 3                 | Tramadol (two doses)                  | Placebo |
| Norrbrink <sup>38</sup>              | 2009 | 36                        | Post-traumatic neuralgia | NR                                | NR          | 51.3        | 10.7        | 28 (78)    | 2                 | Tramadol                              | Placebo |
| Afilalo <sup>39</sup>                | 2010 | 1030                      | Osteoarthritis           | NR                                | NR          | 58.3        | 9.8         | 618 (60)   | 3                 | Tapentadol; Oxycodone                 | Placebo |
| Brevik <sup>40</sup>                 | 2010 | 199                       | Osteoarthritis           | NR                                | NR          | 62.9        | 9.5         | 136 (68)   | 2                 | Buprenorphine                         | Placebo |
| Buynak <sup>41</sup>                 | 2010 | 981                       | Low back pain nos        | NR                                | NR          | 49.9        | 13.8        | 569 (58)   | 3                 | Tapentadol; Oxycodone                 | Placebo |
| Gordon <sup>42</sup> ISRCTN 06013881 | 2010 | 78 <sup>a</sup>           | Low back pain nos        | NR                                | NR          | 50.7        | 11.9        | 47 (60)    | 2                 | Buprenorphine                         | Placebo |

**eTable 3: Characteristics of 96 eligible randomized clinical trials**

| First Author            | Year | Total patients randomized | Clinical condition(s)                                | Duration of chronic pain (months) |             | Age (years) |             | Female sex           | No. of study arms | Interventions |         |
|-------------------------|------|---------------------------|------------------------------------------------------|-----------------------------------|-------------|-------------|-------------|----------------------|-------------------|---------------|---------|
|                         |      |                           |                                                      | Mean/median                       | SD or Range | Mean/median | SD or Range | No. (%)              |                   | Opioid(s)     | Control |
| Gordon <sup>43</sup>    | 2010 | 79 <sup>a</sup>           | Mixed neuropathic & non-neuropathic conditions       | 169.2                             | 128.4       | 54.5        | 12.7        | 25 (47) <sup>c</sup> | 2                 | Buprenorphine | Placebo |
| Hale <sup>44</sup>      | 2010 | 268                       | Low back pain nos                                    | NR                                | NR          | 48.6        | 10.6        | 134 (50)             | 2                 | Hydromorphone | Placebo |
| Katz <sup>45</sup>      | 2010 | 344                       | Osteoarthritis                                       | NR                                | NR          | 54.5        | 12.3        | 201 (58)             | 2                 | Morphine      | Placebo |
| Munera <sup>46</sup>    | 2010 | 315                       | Osteoarthritis                                       | NR                                | NR          | 61          | 1           | 212 (67)             | 2                 | Buprenorphine | Placebo |
| Zin <sup>47</sup>       | 2010 | 62                        | Postherpetic neuralgia & painful diabetic neuropathy | NR                                | NR          | 68.5        | 11.6        | 27 (44)              | 2                 | Oxycodone     | Placebo |
| Friedmann <sup>48</sup> | 2011 | 412                       | Osteoarthritis                                       | NR                                | NR          | 58.3        | 8.2         | 288 (70)             | 2                 | Oxycodone     | Placebo |

**eTable 3: Characteristics of 96 eligible randomized clinical trials**

| First Author            | Year | Total patients randomized | Clinical condition(s)       | Duration of chronic pain (months) |             | Age (years) |             | Female sex | No. of study arms | Interventions                             |         |
|-------------------------|------|---------------------------|-----------------------------|-----------------------------------|-------------|-------------|-------------|------------|-------------------|-------------------------------------------|---------|
|                         |      |                           |                             | Mean/median                       | SD or Range | Mean/median | SD or Range | No. (%)    |                   | Opioid(s)                                 | Control |
| Schwartz <sup>49</sup>  | 2011 | 395                       | Painful diabetic neuropathy | 76.8                              | 66.3        | 62          | 10.5        | 169 (43)   | 2                 | Tapentadol                                | Placebo |
| Steiner <sup>50</sup>   | 2011 | 541                       | Low back pain nos           | 108.6                             | 106         | 49.4        | 13          | 298 (55)   | 2                 | Buprenorphine                             | Placebo |
| Vojtassak <sup>51</sup> | 2011 | 288                       | Osteoarthritis              | NR                                | NR          | 65.5        | NR          | 207 (72)   | 2                 | Hydromorphone                             | Placebo |
| Chu <sup>52</sup>       | 2012 | 139                       | Low back pain nos           | NR                                | NR          | 45          | 13.9        | 61 (44)    | 2                 | Morphine                                  | Placebo |
| Sindrup <sup>53</sup>   | 2012 | 64 <sup>a</sup>           | Painful polyneuropathy      | NR                                | NR          | 58.2        | NR          | 60 (94)    | 3                 | Tramadol; GRT9906 (excluded) <sup>b</sup> | Placebo |
| Uberall <sup>54</sup>   | 2012 | 240                       | Low back pain nos           | NR                                | 79.9        | NR          | 12.1        | 220 (62)   | 2                 | Tramadol                                  | Placebo |
| Cloutier <sup>55</sup>  | 2013 | 83 <sup>a</sup>           | Low back pain nos           | NR                                | NR          | 50.6        | 10.9        | 27 (33)    | 2                 | Oxycodone + Naloxone                      | Placebo |
| Lee <sup>56</sup>       | 2013 | 248                       | Low back pain nos           | NR                                | NR          | 60.2        | 10.3        | 183 (74)   | 2                 | Tramadol + Acetaminophen                  | Placebo |

**eTable 3: Characteristics of 96 eligible randomized clinical trials**

| First Author           | Year | Total patients randomized | Clinical condition(s)                                       | Duration of chronic pain (months) |             | Age (years) |             | Female sex | No. of study arms | Interventions             |         |
|------------------------|------|---------------------------|-------------------------------------------------------------|-----------------------------------|-------------|-------------|-------------|------------|-------------------|---------------------------|---------|
|                        |      |                           |                                                             | Mean/median                       | SD or Range | Mean/median | SD or Range | No. (%)    |                   | Opioid(s)                 | Control |
| Rauck <sup>57</sup>    | 2013 | 990                       | Osteoarthritis                                              | NR                                | NR          | 59.7        | 10.8        | 627 (64)   | 3                 | Hydromorphone (two doses) | Placebo |
| Niesters <sup>58</sup> | 2014 | 25                        | Painful diabetic neuropathy                                 | NR                                | NR          | 63.5        | NR          | 10 (40)    | 2                 | Tapentadol                | Placebo |
| Rauck <sup>59</sup>    | 2014 | 302                       | Low back pain nos                                           | NR                                | NR          | 50.6        | 11.7        | 167 (55)   | 2                 | Hydrocodone               | Placebo |
| Vinik <sup>60</sup>    | 2014 | 320                       | Painful diabetic neuropathy                                 | NR                                | NR          | 58.8        | 9.8         | 131 (41)   | 2                 | Tapentadol                | Placebo |
| Arai <sup>61 d</sup>   | 2015 | 150                       | Mixed neuropathic <sup>c</sup> & non-neuropathic conditions | NR                                | NR          | 66.5        | 13.2        | 80 (49)    | 2                 | Fentanyl                  | Placebo |
| Arai <sup>61 d</sup>   | 2015 | 163                       | Mixed neuropathic conditions                                | NR                                | NR          | 66.6        | 14          | 101 (67)   | 2                 | Fentanyl                  | Placebo |



**eTable 3: Characteristics of 96 eligible randomized clinical trials**

| First Author              | Year | Total patients randomized | Clinical condition(s) | Duration of chronic pain (months) |             | Age (years) |             | Female sex | No. of study arms | Interventions                                            |         |
|---------------------------|------|---------------------------|-----------------------|-----------------------------------|-------------|-------------|-------------|------------|-------------------|----------------------------------------------------------|---------|
|                           |      |                           |                       | Mean/median                       | SD or Range | Mean/median | SD or Range | No. (%)    |                   | Opioid(s)                                                | Control |
| Hale <sup>62</sup>        | 2015 | 370                       | Low back pain nos     | NR                                | NR          | 51.8        | 13          | 189 (51)   | 2                 | Hydrocodone                                              | Placebo |
| Katz <sup>63</sup>        | 2015 | 389                       | Low back pain nos     | NR                                | NR          | 49.6        | 13          | 206 (53)   | 2                 | Oxycodone                                                | Placebo |
| Rauck <sup>64,65</sup>    | 2015 | 281                       | Low back pain nos     | 12.4                              | 10.7        | 50          | 12.6        | 156 (56)   | 2                 | Oxycodone + Naltrexone                                   | Placebo |
| Trenkwalder <sup>66</sup> | 2015 | 202                       | Parkinson's disease   | 40.8                              | 34.8        | 67.1        | 8.5         | 94 (47)    | 2                 | Oxycodone + Naloxone                                     | Placebo |
| Wen <sup>67</sup>         | 2015 | 588                       | Low back pain nos     | NR                                | NR          | 48.6        | 13.4        | 338 (57)   | 2                 | Hydrocodone                                              | Placebo |
| Gimbel <sup>68</sup>      | 2016 | 511                       | Low back pain nos     | NR                                | NR          | 53.55       | 11.18       | 278 (54)   | 2                 | Buprenorphine                                            | Placebo |
| Lin <sup>69</sup>         | 2016 | 21                        | Low back pain nos     | 97.2                              | 92.4        | 41.9        | 10          | 7 (33)     | 2                 | Morphine                                                 | Placebo |
| Mayorga <sup>70</sup>     | 2016 | 196                       | Osteoarthritis        | NR                                | NR          | 59.375      | 9.25        | 110 (56)   | 4                 | Oxycodone; Fulranumab (two doses, excluded) <sup>b</sup> | Placebo |
| Rauck <sup>71</sup>       | 2016 | 420                       | Low back pain nos     | NR                                | NR          | 50.1        | 12.9        | 235 (56)   | 2                 | Buprenorphine                                            | Placebo |

**eTable 3: Characteristics of 96 eligible randomized clinical trials**

| First Author                        | Year | Total patients randomized | Clinical condition(s)                                | Duration of chronic pain (months) |             | Age (years) |             | Female sex | No. of study arms | Interventions                          |            |
|-------------------------------------|------|---------------------------|------------------------------------------------------|-----------------------------------|-------------|-------------|-------------|------------|-------------------|----------------------------------------|------------|
|                                     |      |                           |                                                      | Mean/median                       | SD or Range | Mean/median | SD or Range | No. (%)    |                   | Opioid(s)                              | Control    |
| Simpson <sup>72</sup>               | 2016 | 186                       | Painful diabetic neuropathy                          | NR                                | NR          | 62.95       | 9.45        | 62 (33)    | 2                 | Buprenorphine                          | Placebo    |
| Tominaga <sup>73 d</sup>            | 2016 | 91                        | Mixed neuropathic & non-neuropathic conditions       | NR                                | NR          | NR          | NR          | NR         | 2                 | Tapentadol                             | Placebo    |
| Tominaga <sup>73 d</sup>            | 2016 | 91                        | Postherpetic neuralgia & painful diabetic neuropathy | NR                                | NR          | NR          | NR          | NR         | 2                 | Tapentadol                             | Placebo    |
| Christoph <sup>74</sup>             | 2017 | 641                       | Mixed neuropathic & non-neuropathic conditions       | NR                                | 124.2       | NR          | 11.71       | 412 (65)   | 5                 | Cebranopadol (three doses); Tapentadol | Placebo    |
| Serrie <sup>75</sup>                | 2017 | 990                       | Osteoarthritis                                       | NR                                | NR          | NR          | 9.4         | 707 (72)   | 3                 | Tapentadol; Oxycodone                  | Placebo    |
| <b>Opioids vs NSAIDs ( 11 RCTs)</b> |      |                           |                                                      |                                   |             |             |             |            |                   |                                        |            |
| Pavelka <sup>76</sup>               | 1995 | 60 <sup>a</sup>           | Osteoarthritis                                       | NR                                | NR          | 65.2        | 7.3         | 52 (87)    | 2                 | Tramadol                               | Diclofenac |

**eTable 3: Characteristics of 96 eligible randomized clinical trials**

| First Author              | Year | Total patients randomized | Clinical condition(s)                          | Duration of chronic pain (months) |              | Age (years) |             | Female sex | No. of study arms | Interventions                         |                           |
|---------------------------|------|---------------------------|------------------------------------------------|-----------------------------------|--------------|-------------|-------------|------------|-------------------|---------------------------------------|---------------------------|
|                           |      |                           |                                                | Mean/median                       | SD or Range  | Mean/median | SD or Range | No. (%)    |                   | Opioid(s)                             | Control                   |
| Jamison <sup>77</sup>     | 1998 | 36                        | Mixed neuropathic & non-neuropathic conditions | 79.1                              | 79.4         | 42.6        | 7           | 21 (57)    | 3                 | Oxycodone alone; Oxycodone + morphine | Naproxen                  |
| Pavelka <sup>78</sup>     | 1998 | 60 <sup>a</sup>           | Osteoarthritis                                 | NR                                | 36 to 120    | NR          | 44 to 85    | 52 (96)    | 2                 | Tramadol                              | Diclofenac                |
| Beaulieu <sup>79</sup>    | 2008 | 128                       | Osteoarthritis                                 | 127.8                             | 110.4        | 62.1        | 8.2         | 86 (67)    | 2                 | Tramadol                              | Diclofenac                |
| Liu <sup>80</sup>         | 2009 | 120                       | Postherpetic neuralgia                         | NR                                | NR           | 56.9        | 4.6         | 62 (52)    | 2                 | Oxycodone + Acetaminophen             | Diclofenac                |
| O'Donnell <sup>81 d</sup> | 2009 | 796                       | Low back pain nos                              | 90.1                              | 0.5 to 689.8 | 48.5        | 14.7        | 450 (56)   | 2                 | Tramadol                              | Celecoxib                 |
| O'Donnell <sup>81 d</sup> | 2009 | 802                       | Low back pain nos                              | 97.3                              | 0.1 to 761.6 | 47          | 14.2        | 462 (58)   | 2                 | Tramadol                              | Celecoxib                 |
| Qin <sup>82</sup>         | 2009 | 73                        | Fibromyalgia                                   | NR                                | NR           | 42.5        | 13          | NR         | 2                 | Tramadol + amitriptyline              | Celecoxib + amitriptyline |
| Kim <sup>83</sup>         | 2012 | 48                        | Osteoarthritis                                 | NR                                | NR           | 66.1        | NR          | 31 (65)    | 2                 | Tramadol + Acetaminophen              | Naproxen                  |
| Park <sup>84</sup>        | 2012 | 97                        | Osteoarthritis                                 | NR                                | NR           | 60.6        | 7.5         | 78 (80)    | 2                 | Tramadol + Acetaminophen              | NSAIDs (unspecified)      |

**eTable 3: Characteristics of 96 eligible randomized clinical trials**

| First Author                                           | Year | Total patients randomized | Clinical condition(s)                          | Duration of chronic pain (months) |             | Age (years) |             | Female sex | No. of study arms | Interventions            |                        |
|--------------------------------------------------------|------|---------------------------|------------------------------------------------|-----------------------------------|-------------|-------------|-------------|------------|-------------------|--------------------------|------------------------|
|                                                        |      |                           |                                                | Mean/median                       | SD or Range | Mean/median | SD or Range | No. (%)    |                   | Opioid(s)                | Control                |
| Tetsunaga <sup>85</sup>                                | 2015 | 70                        | Low back pain nos                              | NR                                | NR          | 63.9        | NR          | 44 (63)    | 2                 | Tramadol + Acetaminophen | Celecoxib              |
| <b>Opioids vs anticonvulsants (2 RCTs)<sup>e</sup></b> |      |                           |                                                |                                   |             |             |             |            |                   |                          |                        |
| Ko <sup>86</sup>                                       | 2010 | 163                       | Painful diabetic neuropathy                    | 129                               | 91.2        | 57.9        | 8.4         | 91 (56)    | 2                 | Tramadol + Acetaminophen | Gabapentin             |
| Sakaj <sup>87</sup>                                    | 2015 | 65                        | Mixed neuropathic & non-neuropathic conditions | NR                                | NR          | 72.3        | 5.7         | 20 (31)    | 2                 | Tramadol + Acetaminophen | Pregabalin             |
| <b>Opioids vs synthetic cannabis (1 RCT)</b>           |      |                           |                                                |                                   |             |             |             |            |                   |                          |                        |
| Frank <sup>88</sup>                                    | 2008 | 96 <sup>a</sup>           | Chronic neuropathic pain (unspecified)         | NR                                | NR          | 50.2        | 13.6        | 46 (48)    | 2                 | Dihydrocodeine           | Nabilone               |
| <b>Multiple comparisons (5 RCTs)<sup>f</sup></b>       |      |                           |                                                |                                   |             |             |             |            |                   |                          |                        |
| Raja <sup>89</sup>                                     | 2002 | 76 <sup>a</sup>           | Postherpetic neuralgia                         | NR                                | NR          | NR          | NR          | NR         | 3                 | Morphine                 | Placebo; Nortriptyline |

**eTable 3: Characteristics of 96 eligible randomized clinical trials**

| First Author                         | Year | Total patients randomized | Clinical condition(s)                                | Duration of chronic pain (months) |             | Age (years) |             | Female sex | No. of study arms | Interventions                                                                  |                               |
|--------------------------------------|------|---------------------------|------------------------------------------------------|-----------------------------------|-------------|-------------|-------------|------------|-------------------|--------------------------------------------------------------------------------|-------------------------------|
|                                      |      |                           |                                                      | Mean/median                       | SD or Range | Mean/median | SD or Range | No. (%)    |                   | Opioid(s)                                                                      | Control                       |
| Khoromi <sup>90</sup>                | 2007 | 55 <sup>a</sup>           | Lumbar radiculopathy                                 | NR                                | NR          | 53          | NR          | 25 (45)    | 4                 | Morphine; Morphine+Nortriptyline                                               | Active placebo; Nortriptyline |
| Gilron <sup>91</sup>                 | 2015 | 52 <sup>a</sup>           | Mixed neuropathic pain conditions                    | NR                                | NR          | 66          | 49 to 80    | 14 (27)    | 3                 | Morphine; Morphine + Nortriptyline                                             | Nortriptyline                 |
| Gilron <sup>92</sup>                 | 2005 | 57 <sup>a</sup>           | Postherpetic neuralgia & painful diabetic neuropathy | 54.5                              | 48          | NR          | NR          | NR         | 4                 | Morphine; Morphine+Gabapentin                                                  | Placebo; Gabapentin           |
| DeLemos <sup>93</sup>                | 2011 | 1011                      | Osteoarthritis                                       | 96.7                              | 94.1        | 60.2        | 10.9        | 1011 (100) | 5                 | Tramadol (3 doses)                                                             | Placebo; Celecoxib            |
| <b>Opioids vs Usual Care (1 RCT)</b> |      |                           |                                                      |                                   |             |             |             |            |                   |                                                                                |                               |
| Corsinovi <sup>94</sup>              | 2009 | 154                       | Osteoarthritis                                       | NR                                | NR          | 78          | 8.3         | 154 (100)  | 3                 | Oxycodone +Acetaminophen and usual care; Codeine +Acetaminophen and usual care | Usual care                    |

SD: standard deviation; nos: not otherwise specified; NR: not reported

- a. cross-over trials. The total sample size at randomization among 96 eligible studies were summarized from all patients randomized at each trial; however, we analyzed cross-over trials as parallel trials, which meant that the sample size as effectively doubled for cross-over trials.
- b. comparator excluded from analysis because drug is not used in clinical practice
- c. % of female was reported among 53 patients in the per protocol population, not in the full population of 79 patients randomized
- d. Each of these 3 studies reported 2 separate trials in one paper: Arai et al. 2015, O'Donnell et al 2009, and Tominaga et al 2016
- e. Gilron 2005 randomized one treatment arm to receive the anticonvulsant gabapentin, and is listed under "multiple comparisons"
- f. Of the 5 multiple comparison RCTs, Gilron 2005 and Khoromi 2007 are 4-arm RCTs; we used data from each to inform the effect of opioids vs. placebo (with and without gabapentin or nortriptyline add-on)

**eTable 4: Summary of baseline pain scores in 23 enrichment trials and 51 non-enrichment trials <sup>a</sup>**

| Type of trial         | No. of studies | No. of patients | Average pain score at time of randomization | Median (IQR) of trials reporting mean pain score at time of randomization |
|-----------------------|----------------|-----------------|---------------------------------------------|---------------------------------------------------------------------------|
| Enrichment trials     | 23             | 7,286           | 4.28                                        | 3.15 (2.88 to 5.30)                                                       |
| Non-enrichment trials | 51             | 12,568          | 6.54                                        | 6.38 (5.72 to 6.96)                                                       |

IQR: interquartile range

Enrichment trials precede randomization with an open-label treatment phase. As such, patients would present with lower pain scores when randomized, versus non-enrichment trials.

<sup>a</sup> Of the 96 trials eligible for our review, 74 reported average baseline pain.

**eTable 5: Risk of bias assessment of 96 eligible randomized clinical trials**

| Author                              | Year | Adequate randomization sequence generation | Adequate allocation concealment | Blinding of patients | Blinding of health care providers | Blinding of data collectors | Blinding of outcome assessors | Blinding of data analyst | Loss to follow-up (%) |
|-------------------------------------|------|--------------------------------------------|---------------------------------|----------------------|-----------------------------------|-----------------------------|-------------------------------|--------------------------|-----------------------|
| <b>Opioids vs placebo (76 RCTs)</b> |      |                                            |                                 |                      |                                   |                             |                               |                          |                       |
| Vlok <sup>1</sup>                   | 1987 | No                                         | No                              | Yes                  | Yes                               | Yes                         | Yes                           | No                       | 0.0                   |
| Kjaersgaard-Andersen <sup>2</sup>   | 1990 | No                                         | No                              | Yes                  | Yes                               | Yes                         | Yes                           | No                       | 38.0                  |
| Moran <sup>3</sup>                  | 1991 | No                                         | No                              | Yes                  | Yes                               | Yes                         | Yes                           | No                       | 25.0                  |
| Moulin <sup>4</sup>                 | 1996 | No                                         | No                              | Yes                  | Yes                               | Yes                         | Yes                           | No                       | 24.6                  |
| Harati <sup>5</sup>                 | 1998 | Yes                                        | Yes                             | Yes                  | Yes                               | Yes                         | Yes                           | No                       | 37.4                  |
| Watson <sup>6</sup>                 | 1998 | No                                         | Yes                             | Yes                  | Yes                               | Yes                         | Yes                           | No                       | 22.0                  |
| Caldwell <sup>7</sup>               | 1999 | No                                         | Yes                             | Yes                  | Yes                               | Yes                         | Yes                           | No                       | 33.6                  |
| Schnitzer <sup>8</sup>              | 1999 | No                                         | No                              | Yes                  | Yes                               | Yes                         | Yes                           | No                       | 1.7                   |
| Sindrup <sup>9</sup>                | 1999 | No                                         | No                              | Yes                  | Yes                               | Yes                         | Yes                           | No                       | 20.0                  |
| Peloso <sup>10</sup>                | 2000 | No                                         | No                              | Yes                  | Yes                               | Yes                         | Yes                           | No                       | 35.9                  |
| Russell <sup>11</sup>               | 2000 | Yes                                        | Yes                             | Yes                  | Yes                               | Yes                         | Yes                           | No                       | 1.4                   |
| Schnitzer <sup>12</sup>             | 2000 | Yes                                        | Yes                             | Yes                  | Yes                               | Yes                         | Yes                           | No                       | 42.5                  |



**eTable 5: Risk of bias assessment of 96 eligible randomized clinical trials**

| <b>Author</b>             | <b>Year</b> | <b>Adequate randomization sequence generation</b> | <b>Adequate allocation concealment</b> | <b>Blinding of patients</b> | <b>Blinding of health care providers</b> | <b>Blinding of data collectors</b> | <b>Blinding of outcome assessors</b> | <b>Blinding of data analyst</b> | <b>Loss to follow-up (%)</b> |
|---------------------------|-------------|---------------------------------------------------|----------------------------------------|-----------------------------|------------------------------------------|------------------------------------|--------------------------------------|---------------------------------|------------------------------|
| Fleischmann <sup>13</sup> | 2001        | Yes                                               | No                                     | Yes                         | Yes                                      | Yes                                | Yes                                  | No                              | 71.3                         |
| Huse <sup>14</sup>        | 2001        | No                                                | No                                     | No                          | No                                       | No                                 | No                                   | No                              | 16.7                         |
| Caldwell <sup>15</sup>    | 2002        | No                                                | No                                     | Yes                         | Yes                                      | Yes                                | Yes                                  | No                              | 37.6                         |
| Bennett <sup>16</sup>     | 2003        | Yes                                               | Yes                                    | Yes                         | Yes                                      | Yes                                | Yes                                  | No                              | 36.5                         |
| Boureau <sup>17</sup>     | 2003        | Yes                                               | No                                     | Yes                         | Yes                                      | Yes                                | Yes                                  | No                              | 15.0                         |
| Gimbel <sup>18</sup>      | 2003        | Yes                                               | Yes                                    | Yes                         | Yes                                      | Yes                                | Yes                                  | No                              | 27.7                         |
| Ruoff <sup>19</sup>       | 2003        | Yes                                               | Yes                                    | Yes                         | Yes                                      | Yes                                | Yes                                  | No                              | 47.5                         |
| Babul <sup>20</sup>       | 2004        | Yes                                               | No                                     | Yes                         | Yes                                      | Yes                                | Yes                                  | No                              | 49.6                         |
| Brunnmuller <sup>21</sup> | 2004        | No                                                | No                                     | Yes                         | Yes                                      | No                                 | No                                   | No                              | 35.0                         |
| Emkey <sup>22</sup>       | 2004        | No                                                | No                                     | Yes                         | Yes                                      | Yes                                | Yes                                  | No                              | 26.1                         |
| Peloso <sup>23</sup>      | 2004        | Yes                                               | Yes                                    | Yes                         | Yes                                      | Yes                                | Yes                                  | No                              | 56.5                         |
| Matsumoto <sup>24</sup>   | 2005        | Yes                                               | Yes                                    | Yes                         | Yes                                      | Yes                                | Yes                                  | No                              | 45.2                         |
| Gana <sup>25</sup>        | 2006        | Yes                                               | Yes                                    | Yes                         | Yes                                      | Yes                                | Yes                                  | No                              | 45.3                         |

**eTable 5: Risk of bias assessment of 96 eligible randomized clinical trials**

| <b>Author</b>             | <b>Year</b> | <b>Adequate randomization sequence generation</b> | <b>Adequate allocation concealment</b> | <b>Blinding of patients</b> | <b>Blinding of health care providers</b> | <b>Blinding of data collectors</b> | <b>Blinding of outcome assessors</b> | <b>Blinding of data analyst</b> | <b>Loss to follow-up (%)</b> |
|---------------------------|-------------|---------------------------------------------------|----------------------------------------|-----------------------------|------------------------------------------|------------------------------------|--------------------------------------|---------------------------------|------------------------------|
| Langford <sup>26</sup>    | 2006        | Yes                                               | Yes                                    | Yes                         | Yes                                      | Yes                                | Yes                                  | No                              | 52.2                         |
| Webster <sup>27</sup>     | 2006        | Yes                                               | Yes                                    | Yes                         | Yes                                      | Yes                                | Yes                                  | No                              | 54.4                         |
| Burch <sup>28</sup>       | 2007        | Yes                                               | Yes                                    | Yes                         | Yes                                      | Yes                                | Yes                                  | No                              | 24.0                         |
| Freeman <sup>29</sup>     | 2007        | No                                                | No                                     | Yes                         | Yes                                      | Yes                                | Yes                                  | No                              | 24.6                         |
| Fishman <sup>30</sup>     | 2007        | Yes                                               | Yes                                    | Yes                         | Yes                                      | Yes                                | Yes                                  | No                              | 43.7                         |
| Hale <sup>31</sup>        | 2007        | No                                                | No                                     | Yes                         | Yes                                      | Yes                                | Yes                                  | No                              | 53.1                         |
| Katz <sup>32</sup>        | 2007        | No                                                | Yes                                    | Yes                         | Yes                                      | Yes                                | Yes                                  | No                              | 42.4                         |
| Hanna <sup>33</sup>       | 2008        | No                                                | Yes                                    | Yes                         | Yes                                      | Yes                                | Yes                                  | No                              | 25.9                         |
| Ma <sup>34</sup>          | 2008        | No                                                | No                                     | Yes                         | Yes                                      | Yes                                | Yes                                  | No                              | 89.7                         |
| Thorne <sup>35</sup>      | 2008        | No                                                | No                                     | Yes                         | Yes                                      | Yes                                | Yes                                  | No                              | 25.0                         |
| Vondrackova <sup>36</sup> | 2008        | No                                                | No                                     | Yes                         | Yes                                      | Yes                                | Yes                                  | No                              | 13.1                         |
| Vorsanger <sup>37</sup>   | 2008        | Yes                                               | Yes                                    | Yes                         | Yes                                      | Yes                                | Yes                                  | No                              | 37.6                         |
| Norrbrink <sup>38</sup>   | 2009        | No                                                | Yes                                    | Yes                         | Yes                                      | Yes                                | Yes                                  | No                              | 36.1                         |

**eTable 5: Risk of bias assessment of 96 eligible randomized clinical trials**

| Author                               | Year | Adequate randomization sequence generation | Adequate allocation concealment | Blinding of patients | Blinding of health care providers | Blinding of data collectors | Blinding of outcome assessors | Blinding of data analyst | Loss to follow-up (%) |
|--------------------------------------|------|--------------------------------------------|---------------------------------|----------------------|-----------------------------------|-----------------------------|-------------------------------|--------------------------|-----------------------|
| Afilalo <sup>39</sup>                | 2010 | Yes                                        | Yes                             | Yes                  | Yes                               | Yes                         | Yes                           | No                       | 51.3                  |
| Breivik <sup>40</sup>                | 2010 | Yes                                        | Yes                             | Yes                  | Yes                               | Yes                         | Yes                           | No                       | 42.2                  |
| Buynak <sup>41</sup>                 | 2010 | Yes                                        | Yes                             | Yes                  | Yes                               | Yes                         | Yes                           | No                       | 53.4                  |
| Gordon ISRCTN 06013881 <sup>42</sup> | 2010 | Yes                                        | No                              | Yes                  | Yes                               | Yes                         | Yes                           | No                       | 35.4                  |
| Gordon <sup>43</sup>                 | 2010 | Yes                                        | Yes                             | Yes                  | Yes                               | Yes                         | Yes                           | No                       | 37.2                  |
| Hale <sup>44</sup>                   | 2010 | Yes                                        | Yes                             | Yes                  | Yes                               | Yes                         | Yes                           | No                       | 59.0                  |
| Katz <sup>45</sup>                   | 2010 | Yes                                        | Yes                             | Yes                  | Yes                               | Yes                         | Yes                           | No                       | 39.5                  |
| Munera <sup>46</sup>                 | 2010 | No                                         | No                              | Yes                  | Yes                               | Yes                         | Yes                           | No                       | 50.8                  |
| Zin <sup>47</sup>                    | 2010 | Yes                                        | No                              | Yes                  | Yes                               | Yes                         | Yes                           | No                       | 17.7                  |
| Friedmann <sup>48</sup>              | 2011 | No                                         | No                              | Yes                  | Yes                               | Yes                         | Yes                           | No                       | 36.2                  |
| Schwartz <sup>49</sup>               | 2011 | Yes                                        | Yes                             | Yes                  | Yes                               | Yes                         | Yes                           | No                       | 33.2                  |
| Steiner <sup>50</sup>                | 2011 | No                                         | No                              | Yes                  | Yes                               | Yes                         | Yes                           | No                       | 31.5                  |
| Vojtassak <sup>51</sup>              | 2011 | Yes                                        | Yes                             | Yes                  | Yes                               | Yes                         | Yes                           | No                       | 30.6                  |

**eTable 5: Risk of bias assessment of 96 eligible randomized clinical trials**

| Author                 | Year | Adequate randomization sequence generation | Adequate allocation concealment | Blinding of patients | Blinding of health care providers | Blinding of data collectors | Blinding of outcome assessors | Blinding of data analyst | Loss to follow-up (%) |
|------------------------|------|--------------------------------------------|---------------------------------|----------------------|-----------------------------------|-----------------------------|-------------------------------|--------------------------|-----------------------|
| Chu <sup>52</sup>      | 2012 | No                                         | No                              | Yes                  | No                                | Yes                         | Yes                           | No                       | 25.9                  |
| Sindrup <sup>53</sup>  | 2012 | Yes                                        | Yes                             | Yes                  | Yes                               | Yes                         | Yes                           | Yes                      | 25.0                  |
| Uberall <sup>54</sup>  | 2012 | Yes                                        | Yes                             | Yes                  | Yes                               | Yes                         | Yes                           | Yes                      | 24.6                  |
| Cloutier <sup>55</sup> | 2013 | Yes                                        | Yes                             | Yes                  | Yes                               | Yes                         | Yes                           | No                       | 24.1                  |
| Lee <sup>56</sup>      | 2013 | Yes                                        | Yes                             | Yes                  | Yes                               | Yes                         | Yes                           | Yes                      | 19.8                  |
| Rauck <sup>57</sup>    | 2013 | No                                         | No                              | Yes                  | Yes                               | Yes                         | No                            | No                       | 51.4                  |
| Niesters <sup>58</sup> | 2014 | Yes                                        | Yes                             | Yes                  | Yes                               | Yes                         | Yes                           | No                       | 0.0                   |
| Rauck <sup>59</sup>    | 2014 | No                                         | No                              | Yes                  | Yes                               | No                          | No                            | No                       | 39.4                  |
| Vinik <sup>60</sup>    | 2014 | Yes                                        | Yes                             | Yes                  | Yes                               | Yes                         | Yes                           | No                       | 29.1                  |
| Araj <sup>61 a</sup>   | 2015 | No                                         | No                              | Yes                  | Yes                               | Yes                         | Yes                           | No                       | 49.3                  |
| Araj <sup>61 a</sup>   | 2015 | No                                         | No                              | Yes                  | Yes                               | Yes                         | Yes                           | No                       | 54.0                  |
| Hale <sup>62</sup>     | 2015 | Yes                                        | Yes                             | Yes                  | Yes                               | Yes                         | Yes                           | No                       | 19.9                  |
| Katz <sup>63</sup>     | 2015 | Yes                                        | Yes                             | Yes                  | Yes                               | Yes                         | Yes                           | No                       | 42.9                  |

**eTable 5: Risk of bias assessment of 96 eligible randomized clinical trials**

| Author                             | Year | Adequate randomization sequence generation | Adequate allocation concealment | Blinding of patients | Blinding of health care providers | Blinding of data collectors | Blinding of outcome assessors | Blinding of data analyst | Loss to follow-up (%) |
|------------------------------------|------|--------------------------------------------|---------------------------------|----------------------|-----------------------------------|-----------------------------|-------------------------------|--------------------------|-----------------------|
| Rauck <sup>64,65</sup>             | 2015 | No                                         | No                              | Yes                  | Yes                               | Yes                         | No                            | No                       | 33.1                  |
| Trenkwalder <sup>66</sup>          | 2015 | Yes                                        | Yes                             | Yes                  | Yes                               | Yes                         | Yes                           | Yes                      | 31.2                  |
| Wen <sup>67</sup>                  | 2015 | No                                         | No                              | Yes                  | Yes                               | Yes                         | Yes                           | No                       | 25.3                  |
| Lin <sup>69</sup>                  | 2016 | No                                         | No                              | Yes                  | Yes                               | Yes                         | Yes                           | No                       | 0.0                   |
| Gimbel <sup>68</sup>               | 2016 | No                                         | Yes                             | Yes                  | Yes                               | Yes                         | Yes                           | Yes                      | 30.9                  |
| Mayorga <sup>70</sup>              | 2016 | Yes                                        | Yes                             | Yes                  | Yes                               | Yes                         | Yes                           | No                       | 53.1                  |
| Rauck <sup>71</sup>                | 2016 | No                                         | No                              | Yes                  | Yes                               | Yes                         | Yes                           | No                       | 9.1                   |
| Simpson <sup>72</sup>              | 2016 | Yes                                        | Yes                             | Yes                  | Yes                               | Yes                         | Yes                           | No                       | 32.8                  |
| Tominaga <sup>73 a</sup>           | 2016 | No                                         | No                              | Yes                  | Yes                               | Yes                         | Yes                           | No                       | 13.2                  |
| Tominaga <sup>73 a</sup>           | 2016 | No                                         | No                              | Yes                  | Yes                               | Yes                         | Yes                           | No                       | 8.8                   |
| Christoph <sup>74</sup>            | 2017 | Yes                                        | Yes                             | Yes                  | Yes                               | Yes                         | Yes                           | No                       | 43.8                  |
| Serrie <sup>75</sup>               | 2017 | Yes                                        | Yes                             | Yes                  | Yes                               | Yes                         | Yes                           | No                       | 46.4                  |
| <b>Opioids vs NSAIDs (11 RCTs)</b> |      |                                            |                                 |                      |                                   |                             |                               |                          |                       |

**eTable 5: Risk of bias assessment of 96 eligible randomized clinical trials**

| Author                                                 | Year | Adequate randomization sequence generation | Adequate allocation concealment | Blinding of patients | Blinding of health care providers | Blinding of data collectors | Blinding of outcome assessors | Blinding of data analyst | Loss to follow-up (%) |
|--------------------------------------------------------|------|--------------------------------------------|---------------------------------|----------------------|-----------------------------------|-----------------------------|-------------------------------|--------------------------|-----------------------|
| Pavelka <sup>76</sup>                                  | 1995 | No                                         | No                              | No                   | No                                | No                          | No                            | No                       | 10.0                  |
| Jamison <sup>77</sup>                                  | 1998 | No                                         | No                              | No                   | No                                | No                          | No                            | No                       | 0                     |
| Pavelka <sup>78</sup>                                  | 1998 | Yes                                        | No                              | Yes                  | Yes                               | Yes                         | Yes                           | No                       | 10.0                  |
| Beaulieu <sup>79</sup>                                 | 2008 | Yes                                        | Yes                             | Yes                  | Yes                               | Yes                         | Yes                           | No                       | 24.2                  |
| Liu <sup>80</sup>                                      | 2009 | No                                         | No                              | No                   | No                                | No                          | No                            | No                       | 0.0                   |
| O'Donnell <sup>81 a</sup>                              | 2009 | Yes                                        | Yes                             | Yes                  | Yes                               | Yes                         | Yes                           | No                       | 20.7                  |
| O'Donnell <sup>81 a</sup>                              | 2009 | Yes                                        | Yes                             | Yes                  | Yes                               | Yes                         | Yes                           | No                       | 22.9                  |
| Qin <sup>82</sup>                                      | 2009 | Yes                                        | No                              | No                   | No                                | No                          | Yes                           | No                       | 11.0                  |
| Kim <sup>83</sup>                                      | 2012 | Yes                                        | No                              | No                   | No                                | No                          | No                            | No                       | 10.4                  |
| Park <sup>84</sup>                                     | 2012 | No                                         | No                              | No                   | No                                | No                          | No                            | No                       | 18.6                  |
| Tetsunaga <sup>85</sup>                                | 2015 | Yes                                        | No                              | No                   | No                                | No                          | No                            | No                       | 0.0                   |
| <b>Opioids vs anticonvulsants (2 RCTs)<sup>b</sup></b> |      |                                            |                                 |                      |                                   |                             |                               |                          |                       |
| Ko <sup>86</sup>                                       | 2010 | Yes                                        | Yes                             | No                   | No                                | No                          | No                            | No                       | 25.2                  |

**eTable 5: Risk of bias assessment of 96 eligible randomized clinical trials**

| Author                                       | Year | Adequate randomization sequence generation | Adequate allocation concealment | Blinding of patients | Blinding of health care providers | Blinding of data collectors | Blinding of outcome assessors | Blinding of data analyst | Loss to follow-up (%) |
|----------------------------------------------|------|--------------------------------------------|---------------------------------|----------------------|-----------------------------------|-----------------------------|-------------------------------|--------------------------|-----------------------|
| Sakai <sup>87</sup>                          | 2015 | No                                         | No                              | No                   | No                                | No                          | No                            | No                       | 7.7                   |
| <b>Opioids vs synthetic cannabis (1 RCT)</b> |      |                                            |                                 |                      |                                   |                             |                               |                          |                       |
| Frank <sup>88</sup>                          | 2008 | No                                         | No                              | Yes                  | Yes                               | Yes                         | Yes                           | No                       | 24.0                  |
| <b>Multiple comparisons (5 RCTs)</b>         |      |                                            |                                 |                      |                                   |                             |                               |                          |                       |
| Raja <sup>89</sup>                           | 2002 | Yes                                        | Yes                             | Yes                  | Yes                               | Yes                         | Yes                           | Yes                      | 42.1                  |
| Khoromi <sup>90 c</sup>                      | 2007 | Yes                                        | No                              | Yes                  | Yes                               | Yes                         | Yes                           | No                       | 49.1                  |
| Gilron <sup>91</sup>                         | 2015 | Yes                                        | Yes                             | Yes                  | Yes                               | Yes                         | Yes                           | No                       | 36.5                  |
| Gilron <sup>92 c</sup>                       | 2005 | No                                         | Yes                             | Yes                  | Yes                               | Yes                         | Yes                           | No                       | 28.1                  |
| DeLemos <sup>93</sup>                        | 2011 | No                                         | No                              | Yes                  | Yes                               | Yes                         | Yes                           | No                       | 45.1                  |
| <b>Opioids vs Usual Care (1 RCT)</b>         |      |                                            |                                 |                      |                                   |                             |                               |                          |                       |
| Corsinovi <sup>94</sup>                      | 2009 | No                                         | No                              | No                   | No                                | No                          | No                            | No                       | 27.9                  |

a. Each of these 3 studies reported 2 separate trials in one paper: Arai et al. 2015, O'Donnell et al 2009, and Tominaga et al 2016

b. Gilron 2005 used anticonvulsant gabapentin and is listed in the table under the multiple comparisons

c. Of the 5 multiple comparison RCTs, Gilron 2005 and Khoromi 2007 are 4-arm RCTs; each provided two comparisons of opioids vs. placebo (with and without gabapentin or nortriptyline add-on)

**eTable 6: Original data for pain relief reported by 80 randomized clinical trials of opioids vs. placebo**

| First Author              | Year | Change score reported or converted | Pain scale  |             | Opioids group |              |       | Placebo group |              |       |
|---------------------------|------|------------------------------------|-------------|-------------|---------------|--------------|-------|---------------|--------------|-------|
|                           |      |                                    | Lower limit | Upper limit | Sample size   | Mean         | SD    | Sample size   | Mean         | SD    |
| Vlok <sup>1</sup>         | 1987 | Change score reported              | 0           | 10          | 28            | -3.25        | 2.39  | 28            | -2.38        | 2.11  |
| Moran <sup>3</sup>        | 1991 | Change score converted             | 0           | 100         | 7             | Not reported |       | 8             | Not reported |       |
| Moulin <sup>4</sup>       | 1996 | Change score converted             | 0           | 10          | 46            | -1.1         | 2.66  | 46            | -0.2         | 2.66  |
| Harati <sup>5</sup>       | 1998 | Change score converted             | 0           | 4           | 63            | -1.1         | 0.79  | 64            | -0.4         | 0.80  |
| Watson <sup>6</sup>       | 1998 | Change score converted             | 0           | 100         | 38            | Not reported |       | 38            | Not reported |       |
| Caldwell <sup>7</sup>     | 1999 | Change score reported              | 0           | 3           | 71            | 0.46         | 0.62  | 36            | 1            | 0.55  |
| Sindrup <sup>9</sup>      | 1999 | Change score converted             | 0           | 10          | 28            | Not reported |       | 28            | Not reported |       |
| Peloso <sup>10</sup>      | 2000 | Change score reported              | 0           | 100         | 31            | -25.7        | 23.3  | 35            | -5.4         | 20.3  |
| Russell <sup>11</sup>     | 2000 | Change score converted             | 0           | 10          | 35            | 1.9          | 2.58  | 34            | 3.2          | 2.23  |
| Schnitzer <sup>12</sup>   | 2000 | Change score converted             | 0           | 10          | 127           | -3.7         | 2.40  | 127           | -2.1         | 2.56  |
| Fleischmann <sup>13</sup> | 2001 | Change score converted             | 0           | 4           | 63            | -0.61        | 0.92  | 66            | -0.37        | 0.98  |
| Huse <sup>14</sup>        | 2001 | Change score converted             | 0           | 10          | 9             | -1.39        | 1.39  | 9             | -0.66        | 1.14  |
| Caldwell <sup>15</sup>    | 2002 | Change score reported              | 0           | 100         | 222           | -23.32       | 28.96 | 73            | -13.7        | 29.05 |
| Raja <sup>89</sup>        | 2002 | Change score converted             | 0           | 10          | 51            | -2.1         | 2.17  | 70            | -0.2         | 1.98  |
| Bennett <sup>16</sup>     | 2003 | Change score converted             | 0           | 100         | 156           | -19          | 27.62 | 157           | -7           | 24.95 |
| Boureau <sup>17</sup>     | 2003 | Change score converted             | 0           | 100         | 63            | -35.2        | 19.89 | 62            | -26.8        | 21.86 |
| Gimbel <sup>18</sup>      | 2003 | Change score reported              | 0           | 10          | 82            | -2.6         | 2.54  | 77            | -1.5         | 2.54  |
| Ruoff <sup>19</sup>       | 2003 | Change score reported              | 0           | 45          | 151           | -8.4         | 11.8  | 142           | -4.8         | 9.9   |
| Babul <sup>20</sup>       | 2004 | Change score reported              | 0           | 100         | 124           | -30.4        | 25.6  | 122           | -17.7        | 25.6  |
| Brunnmuller <sup>21</sup> | 2004 | Change score converted             | 0           | 10          | 11            | -3.3         | 2.66  | 8             | -0.6         | 2.66  |
| Emkey <sup>22</sup>       | 2004 | Change score converted             | 0           | 100         | 153           | -27.5        | 22.38 | 153           | -21.2        | 22.91 |



**eTable 6: Original data for pain relief reported by 80 randomized clinical trials of opioids vs. placebo**

| First Author            | Year | Change score reported or converted | Pain scale  |             | Opioids group |        |       | Placebo group |       |       |
|-------------------------|------|------------------------------------|-------------|-------------|---------------|--------|-------|---------------|-------|-------|
|                         |      |                                    | Lower limit | Upper limit | Sample size   | Mean   | SD    | Sample size   | Mean  | SD    |
| Peloso <sup>23</sup>    | 2004 | Change score reported              | 0           | 45          | 164           | -6.1   | 12    | 161           | -2.5  | 9.2   |
| Gilron <sup>92 a</sup>  | 2005 | Change score converted             | 0           | 10          | 57            | -2.66  | 1.59  | 57            | -1.57 | 1.59  |
| Gilron <sup>92 a</sup>  | 2005 | Change score converted             | 0           | 10          | 57            | -2.02  | 1.59  | 57            | -1.23 | 1.59  |
| Matsumoto <sup>24</sup> | 2005 | Change score reported              | 0           | 500         | 348           | -101   | 124.6 | 119           | -58.2 | 85.09 |
| Gana <sup>25</sup>      | 2006 | Change score reported              | 0           | 500         | 806           | -107.6 | 123.4 | 205           | -74.2 | 121.7 |
| Langford <sup>26</sup>  | 2006 | Change score reported              | 0           | 100         | 202           | -23.6  | 25.58 | 197           | -17.9 | 26.67 |
| Webster <sup>27</sup>   | 2006 | Change score converted             | 0           | 10          | 608           | -3.4   | 2.177 | 101           | -2.5  | 2.63  |
| Burch <sup>28</sup>     | 2007 | Change score reported              | 0           | 10          | 393           | -3.03  | 2.12  | 196           | -2.29 | 1.97  |
| Fishman <sup>30</sup>   | 2007 | Change score reported              | 0           | 500         | 311           | -129   | 133.9 | 224           | -97.1 | 54.7  |
| Freeman <sup>29</sup>   | 2007 | Change score reported              | 0           | 10          | 150           | -2.5   | 2.61  | 146           | -1.7  | 2.4   |
| Hale <sup>31</sup>      | 2007 | Change score reported              | 0           | 100         | 49            | 8.7    | 21    | 18            | 31.6  | 12.3  |
| Katz <sup>32</sup>      | 2007 | Change score reported              | 0           | 100         | 71            | 10.9   | 24.53 | 47            | 26    | 27.88 |
| Khoromi <sup>90 a</sup> | 2007 | Change score converted             | 0           | 10          | 28            | -1.2   | 2.36  | 28            | -1.1  | 2.31  |
| Khoromi <sup>90 a</sup> | 2007 | Change score converted             | 0           | 10          | 28            | -1.6   | 2.36  | 28            | -1.8  | 2.31  |
| Hanna <sup>33</sup>     | 2008 | Change score reported              | 0           | 10          | 163           | -2.1   | 2.61  | 165           | -1.5  | 2.38  |
| Ma <sup>34</sup>        | 2008 | Change score converted             | 0           | 10          | 7             | -5.54  | 1.57  | 5             | -3.06 | 1.20  |
| Thorne <sup>35</sup>    | 2008 | Change score converted             | 0           | 100         | 78            | -12.6  | 20.35 | 79            | -3.1  | 22.50 |
| Vorsanger <sup>37</sup> | 2008 | Change score converted             | 0           | 100         | 256           | 4.15   | 24.73 | 126           | 9.6   | 25.30 |
| Norrbrink <sup>38</sup> | 2009 | Change score converted             | 0           | 10          | 23            | -1     | 1.68  | 12            | -0.5  | 1.75  |
| Afilalo <sup>39</sup>   | 2010 | Change score reported              | 0           | 100         | 686           | -15.11 | 25.6  | 337           | -13.1 | 25.6  |
| Breivik <sup>40</sup>   | 2010 | Change score reported              | 0           | 10          | 86            | -0.9   | 1.8   | 91            | -0.5  | 1.5   |
| Buynak <sup>41</sup>    | 2010 | Change score reported              | 0           | 10          | 635           | -2.9   | 2.59  | 316           | -2.1  | 2.33  |

**eTable 6: Original data for pain relief reported by 80 randomized clinical trials of opioids vs. placebo**

| First Author            | Year | Change score reported or converted | Pain scale  |             | Opioids group |        |       | Placebo group |       |       |
|-------------------------|------|------------------------------------|-------------|-------------|---------------|--------|-------|---------------|-------|-------|
|                         |      |                                    | Lower limit | Upper limit | Sample size   | Mean   | SD    | Sample size   | Mean  | SD    |
| Gordon <sup>42</sup>    | 2010 | Change score converted             | 0           | 100         | 52            | -15.6  | 18.88 | 52            | -7.8  | 21.12 |
| Gordon <sup>43</sup>    | 2010 | Change score converted             | 0           | 100         | 53            | -24.1  | 18.34 | 53            | -18.5 | 18.97 |
| Hale <sup>44</sup>      | 2010 | Change score reported              | 0           | 10          | 133           | 0.2    | 2.61  | 133           | 1.6   | 2.61  |
| Katz <sup>45</sup>      | 2010 | Change score reported              | 0           | 10          | 171           | 0.1    | 1.4   | 173           | 0.7   | 1.5   |
| Munera <sup>46</sup>    | 2010 | Change score reported              | 0           | 10          | 149           | -1.81  | 2.69  | 162           | -1.1  | 2.67  |
| Zin <sup>47</sup>       | 2010 | Change score reported              | 0           | 10          | 26            | -3.59  | 2.35  | 29            | -4.03 | 2.33  |
| DeLemos <sup>93</sup>   | 2011 | Change score reported              | 0           | 100         | 599           | -21.32 | 25.39 | 200           | -16.5 | 26.87 |
| Friedmann <sup>48</sup> | 2011 | Change score reported              | 0           | 10          | 203           | -0.7   | 2.05  | 207           | -0.3  | 2.48  |
| Schwartz <sup>49</sup>  | 2011 | Change score reported              | 0           | 10          | 196           | 0      | 2.61  | 193           | 1.4   | 2.61  |
| Steiner <sup>50</sup>   | 2011 | Change score converted             | 0           | 10          | 257           | 1.21   | 2.29  | 283           | 1.79  | 2.20  |
| Vojtassak <sup>51</sup> | 2011 | Change score reported              | 0           | 10          | 132           | -2.4   | 2.1   | 143           | -2.6  | 2.3   |
| Chu <sup>52</sup>       | 2012 | Change score reported              | 0           | 100         | 48            | -21.1  | 15.9  | 55            | -12.5 | 19.2  |
| Sindrup <sup>53</sup>   | 2012 | Change score reported              | 0           | 10          | 56            | -2.4   | 2.1   | 55            | -0.7  | 1.8   |
| Uberall <sup>54</sup>   | 2012 | Change score reported              | 0           | 10          | 85            | -2.03  | 1.83  | 96            | -1.77 | 1.59  |
| Cloutier <sup>55</sup>  | 2013 | Change score reported              | 0           | 100         | 54            | -12.3  | 21.8  | 54            | -5.7  | 23.1  |
| Lee <sup>56</sup>       | 2013 | Change score reported              | 0           | 100         | 83            | -19.4  | 18.99 | 87            | -17.7 | 14.84 |
| Rauck <sup>57</sup>     | 2013 | Change score reported              | 0           | 10          | 649           | -2.25  | 2.88  | 331           | -1.9  | 2.91  |
| Niesters <sup>58</sup>  | 2014 | Change score converted             | 0           | 10          | 12            | -2.6   | 2.06  | 12            | -1.7  | 2.25  |
| Rauck <sup>59</sup>     | 2014 | Change score reported              | 0           | 10          | 151           | 0.48   | 1.56  | 151           | 0.96  | 1.55  |
| Vinik <sup>60</sup>     | 2014 | Change score reported              | 0           | 10          | 146           | -0.04  | 1.97  | 131           | 1.05  | 2.31  |
| Arai <sup>61</sup> b    | 2015 | Change score reported              | 0           | 100         | 84            | -0.3   | 21.28 | 79            | 9.6   | 20.45 |
| Arai <sup>61</sup> b    | 2015 | Change score reported              | 0           | 100         | 73            | -0.2   | 18.21 | 77            | 6.9   | 20.84 |

**eTable 6: Original data for pain relief reported by 80 randomized clinical trials of opioids vs. placebo**

| First Author              | Year | Change score reported or converted | Pain scale  |             | Opioids group |              |      | Placebo group |              |      |
|---------------------------|------|------------------------------------|-------------|-------------|---------------|--------------|------|---------------|--------------|------|
|                           |      |                                    | Lower limit | Upper limit | Sample size   | Mean         | SD   | Sample size   | Mean         | SD   |
| Gilron <sup>91</sup>      | 2015 | Change score converted             | 0           | 10          | 52            | -1.9         | 2.58 | 52            | -1.6         | 2.58 |
| Hale <sup>62</sup>        | 2015 | Change score reported              | 0           | 10          | 191           | -0.03        | 1.66 | 179           | 0.55         | 1.87 |
| Katz <sup>63</sup>        | 2015 | Change score reported              | 0           | 10          | 122           | 0.29         | 1.66 | 100           | 1.85         | 2.2  |
| Rauck <sup>64</sup>       | 2015 | Change score reported              | 0           | 10          | 146           | 0.6          | 1.81 | 134           | 1.2          | 1.93 |
| Trenkwalder <sup>66</sup> | 2015 | Change score converted             | 0           | 10          | 61            | -2.3         | 1.46 | 73            | -1.7         | 1.44 |
| Wen <sup>67</sup>         | 2015 | Change score converted             | 0           | 10          | 296           | -3.69        | 1.87 | 292           | -3.15        | 1.87 |
| Gimbel <sup>68</sup>      | 2016 | Change score reported              | 0           | 10          | 254           | 0.88         | 1.79 | 256           | 1.92         | 1.87 |
| Lin <sup>69</sup>         | 2016 | Change score reported              | 0           | 10          | 11            | -1.52        | 2.4  | 10            | -1.46        | 1.39 |
| Mayorga <sup>70</sup>     | 2016 | Change score reported              | 0           | 10          | 50            | -1.45        | 2.55 | 48            | -2.93        | 2.56 |
| Rauck <sup>71</sup>       | 2016 | Change score reported              | 0           | 10          | 209           | 0.94         | 1.85 | 211           | 1.59         | 2.04 |
| Simpson <sup>72</sup>     | 2016 | Change score reported              | 0           | 10          | 89            | -3.3         | 2.16 | 92            | -2.1         | 2.16 |
| Tominaga <sup>73 b</sup>  | 2016 | Change score reported              | 0           | 10          | 60            | -2.6         | 2.23 | 31            | -2.6         | 2.65 |
| Tominaga <sup>73 b</sup>  | 2016 | Change score reported              | 0           | 10          | 60            | -3           | 1.99 | 31            | -2.9         | 2.22 |
| Christoph <sup>74</sup>   | 2017 | Change score reported              | 0           | 10          | 123           | -3.05        | 2.55 | 125           | -2.16        | 2.35 |
| Serrie <sup>75</sup>      | 2017 | Change score reported              | 0           | 10          | 650           | Not reported |      | 337           | Not reported |      |

- a. Gilron 2005 and Khoromi 2007 are 4-arm RCTs; each contributed twice to our effect estimate of opioids vs. placebo for pain relief (with and without gabapentin or nortriptyline add-on)
- b. Arai 2015 and Tominaga 2016 each reported 2 separate trials in one paper

**eTable 7: Multiple meta-regression of length of follow-up, clinical condition (neuropathic vs. non-neuropathic conditions) and pain relief**

| Factor                                    |                               | No. of Studies  | Coefficient | 95%CI       |             | p-value |
|-------------------------------------------|-------------------------------|-----------------|-------------|-------------|-------------|---------|
|                                           |                               |                 |             | lower limit | upper limit |         |
| neuropathic vs non-neuropathic conditions | Univariable meta-regression   | 76 <sup>a</sup> | -0.076      | -0.174      | 0.022       | 0.127   |
|                                           | Multivariable meta-regression |                 | -0.050      | -0.147      | 0.046       | 0.303   |
| length of follow-up (per day)             | Univariable meta-regression   |                 | 0.006       | 0.002       | 0.010       | 0.006   |
|                                           | Multivariable meta-regression |                 | 0.005       | 0.001       | 0.009       | 0.014   |

<sup>a</sup> Four of 80 trials were excluded due to enrolling mixed populations with neuropathic and non-neuropathic conditions

**eTable 8: GRADE evidence profile of adverse events for opioids vs. placebo and patients with chronic noncancer pain from 83 randomized clinical trials**

| # of Trials                                                                    | # of patients | Duration of follow-up (months) | Risk of bias            | Inconsistency <sup>a</sup> | Indirectness <sup>b</sup> | Imprecision <sup>c</sup> | Publication bias                                      | Treatment association (95% CI)              |               | Overall quality of evidence |
|--------------------------------------------------------------------------------|---------------|--------------------------------|-------------------------|----------------------------|---------------------------|--------------------------|-------------------------------------------------------|---------------------------------------------|---------------|-----------------------------|
|                                                                                |               |                                |                         |                            |                           |                          |                                                       | placebo                                     | opioids       |                             |
| <b>Nausea (35 RCTs)</b>                                                        |               |                                |                         |                            |                           |                          |                                                       |                                             |               |                             |
| 9 enrichment trials with adequate random sequence generation <sup>d</sup>      | 3,021         | 1 to 4                         | No serious risk of bias | No serious inconsistency   | No serious indirectness   | No serious imprecision   | Undetected                                            | 105 (7.9%)                                  | 275 (16.2%)   | <b>High</b>                 |
|                                                                                |               |                                |                         |                            |                           |                          |                                                       | Difference: +8.3% (95%CI +4.9% to +12.5%)   |               |                             |
|                                                                                |               |                                |                         |                            |                           |                          |                                                       | RR 2.04 (95%CI 1.62 to 2.57)                |               |                             |
| 26 non-enrichment trials with adequate random sequence generation <sup>d</sup> | 8,836         | 1 to 6                         | No serious risk of bias | No serious inconsistency   | No serious indirectness   | No serious imprecision   | Undetected; Symmetric funnel plot; Begg's test p=0.40 | 282 (8.2%)                                  | 1,398 (25.9%) | <b>High</b>                 |
|                                                                                |               |                                |                         |                            |                           |                          |                                                       | Difference: +17.7% (95%CI +13.8% to +22.3%) |               |                             |
|                                                                                |               |                                |                         |                            |                           |                          |                                                       | RR 3.17 (95%CI 2.69 to 3.73)                |               |                             |

**eTable 8: GRADE evidence profile of adverse events for opioids vs. placebo and patients with chronic noncancer pain from 83 randomized clinical trials**

| # of Trials                                                           | # of patients | Duration of follow-up (months) | Risk of bias            | Inconsistency <sup>a</sup> | Indirectness <sup>b</sup> | Imprecision <sup>c</sup> | Publication bias                                      | Treatment association (95% CI)             |               | Overall quality of evidence |
|-----------------------------------------------------------------------|---------------|--------------------------------|-------------------------|----------------------------|---------------------------|--------------------------|-------------------------------------------------------|--------------------------------------------|---------------|-----------------------------|
|                                                                       |               |                                |                         |                            |                           |                          |                                                       | placebo                                    | opioids       |                             |
| <b>Constipation<sup>e</sup> (63 RCTs)</b>                             |               |                                |                         |                            |                           |                          |                                                       |                                            |               |                             |
| 52 trials, after excluding studies at risk of publication bias (SE>1) | 18,071        | 1 to 6                         | No serious risk of bias | No serious inconsistency   | No serious indirectness   | No serious imprecision   | Undetected; Symmetric funnel plot; Begg's test p=0.36 | 390 (5.3%)                                 | 1,727 (16.2%) | <b>High</b>                 |
|                                                                       |               |                                |                         |                            |                           |                          |                                                       | Difference: +10.9% (95%CI +8.7% to +13.4%) |               |                             |
|                                                                       |               |                                |                         |                            |                           |                          |                                                       | RR 3.08 (95%CI 2.65 to 3.55)               |               |                             |
| <b>Dizziness (60 RCTs)</b>                                            |               |                                |                         |                            |                           |                          |                                                       |                                            |               |                             |
| 19 enrichment trials <sup>f</sup>                                     | 6,826         | 1 to 4                         | No serious risk of bias | No serious inconsistency   | No serious indirectness   | No serious imprecision   | Undetected; Symmetric funnel plot; Begg's test p=0.68 | 97 (3.1%)                                  | 210 (5.7%)    | <b>High</b>                 |
|                                                                       |               |                                |                         |                            |                           |                          |                                                       | Difference: +2.6% (95%CI +1.4% to +4.3%)   |               |                             |

**eTable 8: GRADE evidence profile of adverse events for opioids vs. placebo and patients with chronic noncancer pain from 83 randomized clinical trials**

| # of Trials                           | # of patients | Duration of follow-up (months) | Risk of bias            | Inconsistency <sup>a</sup> | Indirectness <sup>b</sup> | Imprecision <sup>c</sup> | Publication bias                                      | Treatment association (95% CI)            |               | Overall quality of evidence |
|---------------------------------------|---------------|--------------------------------|-------------------------|----------------------------|---------------------------|--------------------------|-------------------------------------------------------|-------------------------------------------|---------------|-----------------------------|
|                                       |               |                                |                         |                            |                           |                          |                                                       | placebo                                   | opioids       |                             |
|                                       |               |                                |                         |                            |                           |                          |                                                       | RR 1.86 (95%CI 1.45 to 2.39)              |               |                             |
| 41 non-enrichment trials <sup>f</sup> | 12,843        | 1 to 6                         | No serious risk of bias | No serious inconsistency   | No serious indirectness   | No serious imprecision   | Undetected; Symmetric funnel plot; Begg's test p=0.65 | 281 (5.6%)                                | 1,188 (15.1%) | <b>High</b>                 |
|                                       |               |                                |                         |                            |                           |                          |                                                       | Difference: +9.5% (95%CI +7.5% to +11.9%) |               |                             |
|                                       |               |                                |                         |                            |                           |                          |                                                       | RR 2.69 (95%CI 2.33 to 3.11)              |               |                             |
| <b>Drowsiness (54 RCTs)</b>           |               |                                |                         |                            |                           |                          |                                                       |                                           |               |                             |
| 17 enrichment trials <sup>g</sup>     | 5,755         | 1.5 to 3                       | No serious risk of bias | No serious inconsistency   | No serious indirectness   | No serious imprecision   | Undetected; Symmetric funnel plot; Begg's test p=0.34 | 49 (1.8%)                                 | 96 (3.2%)     | <b>High</b>                 |
|                                       |               |                                |                         |                            |                           |                          |                                                       | Difference: +1.5% (95%CI +0.6% to +2.6%)  |               |                             |

**eTable 8: GRADE evidence profile of adverse events for opioids vs. placebo and patients with chronic noncancer pain from 83 randomized clinical trials**

| # of Trials                                        | # of patients | Duration of follow-up (months) | Risk of bias            | Inconsistency <sup>a</sup> | Indirectness <sup>b</sup> | Imprecision <sup>c</sup>         | Publication bias                                      | Treatment association (95% CI)            |               | Overall quality of evidence |
|----------------------------------------------------|---------------|--------------------------------|-------------------------|----------------------------|---------------------------|----------------------------------|-------------------------------------------------------|-------------------------------------------|---------------|-----------------------------|
|                                                    |               |                                |                         |                            |                           |                                  |                                                       | placebo                                   | opioids       |                             |
| 37 non-enrichment trials <sup>g</sup>              | 12,234        | 1 to 6                         | No serious risk of bias | No serious inconsistency   | No serious indirectness   | No serious imprecision           | Undetected; Symmetric funnel plot; Begg's test p=0.12 | RR 1.82 (95%CI 1.35 to 2.45)              |               | <b>High</b>                 |
|                                                    |               |                                |                         |                            |                           |                                  |                                                       | 195 (4.2%)                                | 1,139 (15.0%) |                             |
|                                                    |               |                                |                         |                            |                           |                                  |                                                       | Difference: +10.8 (95%CI +7.9% to +14.5%) |               |                             |
|                                                    |               |                                |                         |                            |                           |                                  |                                                       | RR 3.59 (95%CI 2.88 to 4.47)              |               |                             |
| <b>Headache<sup>h</sup> (52 RCTs)</b>              |               |                                |                         |                            |                           |                                  |                                                       |                                           |               |                             |
| 50 with blinding of outcome assessors <sup>h</sup> | 18,412        | 1 to 6                         | No serious risk of bias | No serious inconsistency   | No serious indirectness   | Serious imprecision <sup>i</sup> | Undetected; Symmetric funnel plot; Begg's test p=0.39 | 576 (7.8%)                                | 933 (8.6%)    | <b>Moderate</b>             |
|                                                    |               |                                |                         |                            |                           |                                  |                                                       | Difference: +0.8% (95%CI -0.1% to +1.7%)  |               |                             |



**eTable 8: GRADE evidence profile of adverse events for opioids vs. placebo and patients with chronic noncancer pain from 83 randomized clinical trials**

| # of Trials                            | # of patients | Duration of follow-up (months) | Risk of bias            | Inconsistency <sup>a</sup> | Indirectness <sup>b</sup> | Imprecision <sup>c</sup> | Publication bias                                      | Treatment association (95% CI)           |            | Overall quality of evidence |
|----------------------------------------|---------------|--------------------------------|-------------------------|----------------------------|---------------------------|--------------------------|-------------------------------------------------------|------------------------------------------|------------|-----------------------------|
|                                        |               |                                |                         |                            |                           |                          |                                                       | placebo                                  | opioids    |                             |
|                                        |               |                                |                         |                            |                           |                          |                                                       | RR 1.10 (95%CI 0.99 to 1.22)             |            |                             |
| <b>Pruritis (35 RCTs)</b>              |               |                                |                         |                            |                           |                          |                                                       |                                          |            |                             |
| 35                                     | 12,761        | 1 to 6                         | No serious risk of bias | No serious inconsistency   | No serious indirectness   | No serious imprecision   | Undetected: Symmetric funnel plot; Begg's test p=0.46 | 186 (3.8%)                               | 759 (9.7%) | <b>High</b>                 |
|                                        |               |                                |                         |                            |                           |                          |                                                       | Difference: +6.1% (95%CI +3.2% to +9.8%) |            |                             |
|                                        |               |                                |                         |                            |                           |                          |                                                       | RR 2.59 (95%CI 1.86 to 3.62)             |            |                             |
| <b>Dry mouth<sup>j</sup> (34 RCTs)</b> |               |                                |                         |                            |                           |                          |                                                       |                                          |            |                             |
| 30, after excluding                    | 11,129        | 1 to 4                         | No serious              | No serious inconsistency   | No serious indirectness   | No serious imprecision   | Undetected; Symmetric                                 | 82 (1.9%)                                | 335 (4.9%) | <b>High</b>                 |

**eTable 8: GRADE evidence profile of adverse events for opioids vs. placebo and patients with chronic noncancer pain from 83 randomized clinical trials**

| # of Trials                                     | # of patients | Duration of follow-up (months) | Risk of bias | Inconsistency <sup>a</sup> | Indirectness <sup>b</sup> | Imprecision <sup>c</sup> | Publication bias                | Treatment association (95% CI)           |                              | Overall quality of evidence |
|-------------------------------------------------|---------------|--------------------------------|--------------|----------------------------|---------------------------|--------------------------|---------------------------------|------------------------------------------|------------------------------|-----------------------------|
|                                                 |               |                                |              |                            |                           |                          |                                 | placebo                                  | opioids                      |                             |
| trials with ≥20% loss to follow-up <sup>j</sup> |               |                                | risk of bias |                            |                           |                          | funnel plot; Begg's test p=0.64 | Difference: +3.0% (95%CI +1.9% to +4.5%) | RR 2.57 (95%CI 1.98 to 3.34) |                             |

RR: relative risk; CI: confidence interval; SE: standard error

- a. Inconsistency refers to an unexplained heterogeneity of results. An I<sup>2</sup> of 75-100% indicates that heterogeneity may be considerable
- b. Indirectness results if the patients, intervention, control or outcomes are different from the research question under investigation
- c. In this review, serious imprecision refers to situations in which the confidence interval includes both benefit and harm
- d. When restricted to trials with adequate randomization sequence generation (test of interaction p-value = 0.002), compared to placebo, opioids were associated with nausea, but less so for enrichment vs. non-enrichment trials (test of interaction p-value <0.001).
- e. Publication bias was detected (p= 0.008), and our pooled analysis excludes 11 trials with evidence of small study effects.
- f. Compared to placebo, opioids were associated with dizziness, but less so for enrichment vs. non-enrichment trials (test of interaction p-value = 0.01).
- g. Compared to placebo, opioids were associated with drowsiness, but less so for enrichment vs. non-enrichment trials (test of interaction p-value = 0.01).
- h. We found a significant subgroup effect for trials reporting blinded outcome assessors vs. not (test of interaction p-value = 0.04).
- i. Confidence intervals include benefit and harm
- j. We found a significant subgroup effect for trials reporting <20% loss to follow-up vs. ≥20% loss to follow-up (test of interaction p-value = 0.008).

**eTable 9: GRADE evidence profile of opioids vs. NSAIDs for patients with chronic noncancer pain from 12 randomized clinical trials <sup>a</sup>**

| # of Trials                                                                                                              | # of patients | Duration of follow-up (months) | Risk of bias            | Inconsistency <sup>b</sup> | Indirectness <sup>c</sup> | Imprecision <sup>d</sup>         | Publication bias | Treatment association (95% CI)            |                             | Overall quality of evidence |
|--------------------------------------------------------------------------------------------------------------------------|---------------|--------------------------------|-------------------------|----------------------------|---------------------------|----------------------------------|------------------|-------------------------------------------|-----------------------------|-----------------------------|
|                                                                                                                          |               |                                |                         |                            |                           |                                  |                  | NSAIDs                                    | opioids                     |                             |
| <b>Pain: 10 cm VAS for pain; lower is better; the MID = 1 cm</b>                                                         |               |                                |                         |                            |                           |                                  |                  |                                           |                             |                             |
| 9                                                                                                                        | 1,431         | 1-6                            | No serious risk of bias | No serious inconsistency   | No serious indirectness   | Serious imprecision <sup>e</sup> | Undetected;      | 381 (74.2%) achieve the MID               | 773 (84.3%) achieve the MID | <b>Moderate</b>             |
|                                                                                                                          |               |                                |                         |                            |                           |                                  |                  | Difference: 10.1% (95%CI -6.8% to +19.9%) |                             |                             |
|                                                                                                                          |               |                                |                         |                            |                           |                                  |                  | WMD -0.60 cm (95%CI -1.54 cm to +0.34 cm) |                             |                             |
| <b>Physical Functioning: 0 to 100-point SF-36 physical component summary scale; higher is better; the MID = 5-points</b> |               |                                |                         |                            |                           |                                  |                  |                                           |                             |                             |
| 7                                                                                                                        | 1,311         | 1-4                            | No serious risk of bias | No serious inconsistency   | No serious indirectness   | Serious imprecision <sup>e</sup> | Undetected       | 224 (49.1%) achieve the MID               | 403 (47.1%) achieve the MID | <b>Moderate</b>             |

**eTable 9: GRADE evidence profile of opioids vs. NSAIDs for patients with chronic noncancer pain from 12 randomized clinical trials <sup>a</sup>**

| # of Trials                                                                                                             | # of patients | Duration of follow-up (months) | Risk of bias            | Inconsistency <sup>b</sup> | Indirectness <sup>c</sup> | Imprecision <sup>d</sup>         | Publication bias | Treatment association (95% CI)           |                             | Overall quality of evidence |
|-------------------------------------------------------------------------------------------------------------------------|---------------|--------------------------------|-------------------------|----------------------------|---------------------------|----------------------------------|------------------|------------------------------------------|-----------------------------|-----------------------------|
|                                                                                                                         |               |                                |                         |                            |                           |                                  |                  | NSAIDs                                   | opioids                     |                             |
|                                                                                                                         |               |                                |                         |                            |                           |                                  |                  | Difference: -2.0% (95%CI -6.0% to +2.0%) |                             |                             |
|                                                                                                                         |               |                                |                         |                            |                           |                                  |                  | WMD -0.90 points (95%CI -2.69 to +0.89)  |                             |                             |
| <b>Emotional Functioning: 0 to 100-point SF-36 mental component summary scale; higher is better; the MID = 5-points</b> |               |                                |                         |                            |                           |                                  |                  |                                          |                             |                             |
| 2                                                                                                                       | 837           | 3 to 4                         | No serious risk of bias | No serious inconsistency   | No serious indirectness   | Serious imprecision <sup>e</sup> | Undetected       | 90 (42%) achieve the MID                 | 258 (41.4%) achieve the MID | <b>Moderate</b>             |
|                                                                                                                         |               |                                |                         |                            |                           |                                  |                  | Difference: -0.6% (95%CI -3.6% to +2.4%) |                             |                             |
|                                                                                                                         |               |                                |                         |                            |                           |                                  |                  | WMD -0.27 points (95%CI -1.62 to +1.08)  |                             |                             |

**eTable 9: GRADE evidence profile of opioids vs. NSAIDs for patients with chronic noncancer pain from 12 randomized clinical trials <sup>a</sup>**

| # of Trials                                                                                                             | # of patients | Duration of follow-up (months) | Risk of bias            | Inconsistency <sup>b</sup> | Indirectness <sup>c</sup> | Imprecision <sup>d</sup>         | Publication bias | Treatment association (95% CI)            |                            | Overall quality of evidence |
|-------------------------------------------------------------------------------------------------------------------------|---------------|--------------------------------|-------------------------|----------------------------|---------------------------|----------------------------------|------------------|-------------------------------------------|----------------------------|-----------------------------|
|                                                                                                                         |               |                                |                         |                            |                           |                                  |                  | NSAIDs                                    | opioids                    |                             |
| <b>Role Functioning: 0 to 100-point SF-36 physical role functioning subscale; higher is better; the MID = 10-points</b> |               |                                |                         |                            |                           |                                  |                  |                                           |                            |                             |
| 1                                                                                                                       | 70            | 2                              | No serious risk of bias | No serious inconsistency   | No serious indirectness   | Serious imprecision <sup>e</sup> | Undetected       | 29 (83.7%) achieve the MID                | 31 (89.3%) achieve the MID | <b>Moderate</b>             |
|                                                                                                                         |               |                                |                         |                            |                           |                                  |                  | Difference: +5.6% (95%CI -5.7% to +11.9%) |                            |                             |
|                                                                                                                         |               |                                |                         |                            |                           |                                  |                  | WMD +12.33 points (95%CI -9.86 to +34.53) |                            |                             |
| <b>Sleep Quality: 100 mm VAS for sleep quality (on the SF-36); higher is better; the MID = 10 mm</b>                    |               |                                |                         |                            |                           |                                  |                  |                                           |                            |                             |
| 2                                                                                                                       | 898           | 1.5 to 3                       | No serious risk of bias | No serious inconsistency   | No serious indirectness   | Serious imprecision <sup>e</sup> | Undetected       | 134 (52.8%) achieve the MID               | 316 (49%) achieve the MID  | <b>Moderate</b>             |

**eTable 9: GRADE evidence profile of opioids vs. NSAIDs for patients with chronic noncancer pain from 12 randomized clinical trials <sup>a</sup>**

| # of Trials     | # of patients | Duration of follow-up (months) | Risk of bias            | Inconsistency <sup>b</sup> | Indirectness <sup>c</sup> | Imprecision <sup>d</sup> | Publication bias | Treatment association (95% CI)            |            | Overall quality of evidence |
|-----------------|---------------|--------------------------------|-------------------------|----------------------------|---------------------------|--------------------------|------------------|-------------------------------------------|------------|-----------------------------|
|                 |               |                                |                         |                            |                           |                          |                  | NSAIDs                                    | opioids    |                             |
|                 |               |                                |                         |                            |                           |                          |                  | Difference: -3.8% (95%CI -9.3% to +1.7%)  |            |                             |
|                 |               |                                |                         |                            |                           |                          |                  | WMD -3.06 mm (95%CI -7.50 to +1.37)       |            |                             |
| <b>Vomiting</b> |               |                                |                         |                            |                           |                          |                  |                                           |            |                             |
| 5               | 2,632         | 1.5 to 4                       | No serious risk of bias | No serious inconsistency   | No serious indirectness   | No serious imprecision   | Undetected       | 19 (1.7%)                                 | 119 (7.9%) | <b>High</b>                 |
|                 |               |                                |                         |                            |                           |                          |                  | Difference: +6.2% (95%CI +3.2% to +11.1%) |            |                             |
|                 |               |                                |                         |                            |                           |                          |                  | RR 4.71 (95%CI 2.92 to 7.60)              |            |                             |
| <b>Nausea</b>   |               |                                |                         |                            |                           |                          |                  |                                           |            |                             |

**eTable 9: GRADE evidence profile of opioids vs. NSAIDs for patients with chronic noncancer pain from 12 randomized clinical trials <sup>a</sup>**

| # of Trials         | # of patients | Duration of follow-up (months) | Risk of bias            | Inconsistency <sup>b</sup> | Indirectness <sup>c</sup> | Imprecision <sup>d</sup> | Publication bias | Treatment association (95% CI)             |             | Overall quality of evidence |
|---------------------|---------------|--------------------------------|-------------------------|----------------------------|---------------------------|--------------------------|------------------|--------------------------------------------|-------------|-----------------------------|
|                     |               |                                |                         |                            |                           |                          |                  | NSAIDs                                     | opioids     |                             |
| 8                   | 2,829         | 1.5 to 6                       | No serious risk of bias | No serious inconsistency   | No serious indirectness   | No Serious imprecision   | Undetected       | 93 (7.6%)                                  | 318 (19.1%) | <b>High</b>                 |
|                     |               |                                |                         |                            |                           |                          |                  | Difference: +11.5% (95%CI +7.6% to +16.4%) |             |                             |
|                     |               |                                |                         |                            |                           |                          |                  | RR 2.51 (95%CI 2.00 to 3.15)               |             |                             |
| <b>Constipation</b> |               |                                |                         |                            |                           |                          |                  |                                            |             |                             |
| 9                   | 2,872         | 1.5 to 6                       | No serious risk of bias | No serious inconsistency   | No serious indirectness   | No serious imprecision   | Undetected;      | 40 (3.2%)                                  | 190 (9.0%)  | <b>High</b>                 |
|                     |               |                                |                         |                            |                           |                          |                  | Difference: +5.8% (95%CI +2.6% to +11.0%)  |             |                             |
|                     |               |                                |                         |                            |                           |                          |                  | RR 2.84 (95%CI 1.82 to 4.43)               |             |                             |

**eTable 9: GRADE evidence profile of opioids vs. NSAIDs for patients with chronic noncancer pain from 12 randomized clinical trials <sup>a</sup>**

| # of Trials       | # of patients | Duration of follow-up (months) | Risk of bias            | Inconsistency <sup>b</sup> | Indirectness <sup>c</sup> | Imprecision <sup>d</sup> | Publication bias | Treatment association (95% CI)            |             | Overall quality of evidence |
|-------------------|---------------|--------------------------------|-------------------------|----------------------------|---------------------------|--------------------------|------------------|-------------------------------------------|-------------|-----------------------------|
|                   |               |                                |                         |                            |                           |                          |                  | NSAIDs                                    | opioids     |                             |
| <b>Dizziness</b>  |               |                                |                         |                            |                           |                          |                  |                                           |             |                             |
| 8                 | 2,829         | 1.5 to 4                       | No serious risk of bias | No serious inconsistency   | No serious indirectness   | No Serious imprecision   | Undetected;      | 86 (7.0%)                                 | 261 (14.0%) | <b>High</b>                 |
|                   |               |                                |                         |                            |                           |                          |                  | Difference: +7.0% (95%CI +3.3% to +11.7%) |             |                             |
|                   |               |                                |                         |                            |                           |                          |                  | RR 1.98 (95%CI 1.47 to 2.66)              |             |                             |
| <b>Drowsiness</b> |               |                                |                         |                            |                           |                          |                  |                                           |             |                             |
| 6                 | 2,618         | 1.5 to 4                       | No serious risk of bias | No serious inconsistency   | No serious indirectness   | No Serious imprecision   | Undetected       | 50 (4.5%)                                 | 161 (10.3%) | <b>High</b>                 |
|                   |               |                                |                         |                            |                           |                          |                  | Difference: +5.8% (95%CI +2.3% to +11.1%) |             |                             |



**eTable 9: GRADE evidence profile of opioids vs. NSAIDs for patients with chronic noncancer pain from 12 randomized clinical trials <sup>a</sup>**

| # of Trials     | # of patients | Duration of follow-up (months) | Risk of bias            | Inconsistency <sup>b</sup> | Indirectness <sup>c</sup> | Imprecision <sup>d</sup> | Publication bias | Treatment association (95% CI)           |             | Overall quality of evidence |
|-----------------|---------------|--------------------------------|-------------------------|----------------------------|---------------------------|--------------------------|------------------|------------------------------------------|-------------|-----------------------------|
|                 |               |                                |                         |                            |                           |                          |                  | NSAIDs                                   | opioids     |                             |
|                 |               |                                |                         |                            |                           |                          |                  | RR 2.29 (95%CI 1.52 to 3.46)             |             |                             |
| <b>Headache</b> |               |                                |                         |                            |                           |                          |                  |                                          |             |                             |
| 6               | 2,668         | 1.5 to 4                       | No serious risk of bias | No serious inconsistency   | No serious indirectness   | No Serious imprecision   | Undetected       | 111 (9.8%)                               | 209 (13.5%) | <b>High</b>                 |
|                 |               |                                |                         |                            |                           |                          |                  | Difference: +3.7% (95%CI +1.0% to +7.0%) |             |                             |
|                 |               |                                |                         |                            |                           |                          |                  | RR 1.37 (95%CI 1.10 to 1.69)             |             |                             |
| <b>Pruritis</b> |               |                                |                         |                            |                           |                          |                  |                                          |             |                             |
| 4               | 2,420         | 1.5 to 4                       | No serious risk of bias | No serious inconsistency   | No serious indirectness   | No Serious imprecision   | Undetected       | 15 (1.5%)                                | 100 (5.9%)  | <b>High</b>                 |

**eTable 9: GRADE evidence profile of opioids vs. NSAIDs for patients with chronic noncancer pain from 12 randomized clinical trials <sup>a</sup>**

| # of Trials      | # of patients | Duration of follow-up (months) | Risk of bias            | Inconsistency <sup>b</sup> | Indirectness <sup>c</sup> | Imprecision <sup>d</sup> | Publication bias | Treatment association (95% CI)           |           | Overall quality of evidence |
|------------------|---------------|--------------------------------|-------------------------|----------------------------|---------------------------|--------------------------|------------------|------------------------------------------|-----------|-----------------------------|
|                  |               |                                |                         |                            |                           |                          |                  | NSAIDs                                   | opioids   |                             |
|                  |               |                                |                         |                            |                           |                          |                  | Difference: +4.4% (95%CI +2.0% to +8.7%) |           |                             |
|                  |               |                                |                         |                            |                           |                          |                  | RR 4.01 (95%CI 2.33 to 6.89)             |           |                             |
| <b>Dry mouth</b> |               |                                |                         |                            |                           |                          |                  |                                          |           |                             |
| 3                | 1,629         | 1.5 to 4                       | No serious risk of bias | No serious inconsistency   | No serious indirectness   | No Serious imprecision   | Undetected       | 10 (1.6%)                                | 69 (5.6%) | <b>High</b>                 |
|                  |               |                                |                         |                            |                           |                          |                  | Difference: +4% (95%CI +1.2% to +9.5%)   |           |                             |
|                  |               |                                |                         |                            |                           |                          |                  | RR 3.42 (95%CI 1.73 to 6.77)             |           |                             |

WMD: weighted mean difference. RR: relative risk; CI: confidence interval; VAS: visual analogue scale; MID: minimally important difference; NSAIDs: nonsteroidal anti-inflammatory drugs

<sup>a</sup>. No study reported social functioning when comparing opioids with NSAIDs

<sup>b</sup>. Inconsistency refers to an unexplained heterogeneity of results. An  $I^2$  of 75-100% indicates that heterogeneity may be considerable

- c. Indirectness results if the intervention, patients or outcomes are different from the research question under investigation
- d. In this review, serious imprecision refers to situations in which the confidence interval includes both benefit and harm
- e. Wide confidence intervals which include benefit and harm

**eTable 10: GRADE evidence profile of opioids vs. tricyclic antidepressants for patients with chronic noncancer pain from 3 randomized clinical trials <sup>a</sup>**

| # of Trials                                                                                                      | # of patients | Duration of follow-up (months) | Risk of bias                      | Inconsistency <sup>b</sup> | Indirectness <sup>c</sup> | Imprecision <sup>d</sup> | Publication bias | Treatment association (95% CI)             |                            | Overall quality of evidence |
|------------------------------------------------------------------------------------------------------------------|---------------|--------------------------------|-----------------------------------|----------------------------|---------------------------|--------------------------|------------------|--------------------------------------------|----------------------------|-----------------------------|
|                                                                                                                  |               |                                |                                   |                            |                           |                          |                  | antidepressants                            | opioids                    |                             |
| Emotional Functioning: 0 to 100-point SF-36 mental component summary scale; higher is better; the MID = 5-points |               |                                |                                   |                            |                           |                          |                  |                                            |                            |                             |
| 2                                                                                                                | 158           | 1.25-2 (5-8 weeks)             | Serious risk of bias <sup>e</sup> | No serious inconsistency   | No serious indirectness   | No serious imprecision   | Undetected       | 38 (48.7%) achieve the MID                 | 26 (32.6%) achieve the MID | <b>Moderate</b>             |
|                                                                                                                  |               |                                |                                   |                            |                           |                          |                  | Difference: -16.1% (95%CI -3.8% to -27.0%) |                            |                             |
|                                                                                                                  |               |                                |                                   |                            |                           |                          |                  | WMD -6.22 points (95%CI -11.06 to -1.38)   |                            |                             |

**eTable 10: GRADE evidence profile of opioids vs. tricyclic antidepressants for patients with chronic noncancer pain from 3 randomized clinical trials <sup>a</sup>**

| # of Trials                                                                                                                         | # of patients | Duration of follow-up (months) | Risk of bias                      | Inconsistency <sup>b</sup> | Indirectness <sup>c</sup> | Imprecision <sup>d</sup>         | Publication bias | Treatment association (95% CI)           |         | Overall quality of evidence |
|-------------------------------------------------------------------------------------------------------------------------------------|---------------|--------------------------------|-----------------------------------|----------------------------|---------------------------|----------------------------------|------------------|------------------------------------------|---------|-----------------------------|
|                                                                                                                                     |               |                                |                                   |                            |                           |                                  |                  | antidepressants                          | opioids |                             |
| <b>Role Functioning: 0 to 100-point SF-36 physical role functioning subscale; higher is better; the MID = 10-points<sup>g</sup></b> |               |                                |                                   |                            |                           |                                  |                  |                                          |         |                             |
| 2                                                                                                                                   | 158           | 1.25-2 (5-8 weeks)             | Serious risk of bias <sup>e</sup> | No serious inconsistency   | No serious indirectness   | Serious imprecision <sup>f</sup> | Undetected       | WMD -5.15 points (95%CI -19.92 to +9.62) |         | <b>Low</b>                  |
| <b>Social Functioning: 0 to 100-point SF-36 social role functioning subscale; higher is better; the MID = 10-points<sup>g</sup></b> |               |                                |                                   |                            |                           |                                  |                  |                                          |         |                             |
| 2                                                                                                                                   | 158           | 1.25-2 (5-8 weeks)             | Serious risk of bias <sup>e</sup> | No serious inconsistency   | No serious indirectness   | Serious imprecision <sup>f</sup> | Undetected       | WMD -4.42 points (95%CI -12.23 to +3.40) |         | <b>Low</b>                  |
| <b>Nausea</b>                                                                                                                       |               |                                |                                   |                            |                           |                                  |                  |                                          |         |                             |

**eTable 10: GRADE evidence profile of opioids vs. tricyclic antidepressants for patients with chronic noncancer pain from 3 randomized clinical trials <sup>a</sup>**

| # of Trials         | # of patients | Duration of follow-up (months) | Risk of bias                      | Inconsistency <sup>b</sup> | Indirectness <sup>c</sup> | Imprecision <sup>d</sup>         | Publication bias | Treatment association (95% CI)            |            | Overall quality of evidence |
|---------------------|---------------|--------------------------------|-----------------------------------|----------------------------|---------------------------|----------------------------------|------------------|-------------------------------------------|------------|-----------------------------|
|                     |               |                                |                                   |                            |                           |                                  |                  | antidepressants                           | opioids    |                             |
| 1                   | 56            | 1.25 (5 weeks)                 | Serious risk of bias <sup>e</sup> | No serious inconsistency   | No serious indirectness   | Serious imprecision <sup>f</sup> | Not applicable   | 0 (0%)                                    | 2 (7.1%)   | <b>Low</b>                  |
|                     |               |                                |                                   |                            |                           |                                  |                  | Difference: +7.1% (95%CI -4.5% to +18.8%) |            |                             |
|                     |               |                                |                                   |                            |                           |                                  |                  | RR 5.00 (95%CI 0.25 to 99.67)             |            |                             |
| <b>Constipation</b> |               |                                |                                   |                            |                           |                                  |                  |                                           |            |                             |
| 1                   | 56 (1 RCT)    | 1.25 (5 weeks)                 |                                   | No serious inconsistency   | No serious indirectness   | No serious imprecision           |                  | 7 (25%)                                   | 18 (64.3%) | <b>Moderate</b>             |

**eTable 10: GRADE evidence profile of opioids vs. tricyclic antidepressants for patients with chronic noncancer pain from 3 randomized clinical trials <sup>a</sup>**

| # of Trials      | # of patients | Duration of follow-up (months) | Risk of bias                      | Inconsistency <sup>b</sup> | Indirectness <sup>c</sup> | Imprecision <sup>d</sup>         | Publication bias | Treatment association (95% CI)              |           | Overall quality of evidence |
|------------------|---------------|--------------------------------|-----------------------------------|----------------------------|---------------------------|----------------------------------|------------------|---------------------------------------------|-----------|-----------------------------|
|                  |               |                                |                                   |                            |                           |                                  |                  | antidepressants                             | opioids   |                             |
|                  | Follow-up:    |                                | Serious risk of bias <sup>e</sup> |                            |                           |                                  | Not applicable   | Difference: +39.3% (95%CI +15.4% to +63.2%) |           |                             |
|                  |               |                                |                                   |                            |                           |                                  |                  | RR 2.57 (95%CI 1.28 to 5.17)                |           |                             |
| <b>Dizziness</b> |               |                                |                                   |                            |                           |                                  |                  |                                             |           |                             |
| 1                | 56            | 1.25 (5 weeks)                 | Serious risk of bias <sup>e</sup> | No serious inconsistency   | No serious indirectness   | Serious imprecision <sup>f</sup> | Not applicable   | 2 (7.1%)                                    | 4 (14.3%) | <b>Low</b>                  |
|                  |               |                                |                                   |                            |                           |                                  |                  | Difference: +7.2% (95%CI -9% to +23.2%)     |           |                             |

**eTable 10: GRADE evidence profile of opioids vs. tricyclic antidepressants for patients with chronic noncancer pain from 3 randomized clinical trials <sup>a</sup>**

| # of Trials       | # of patients | Duration of follow-up (months) | Risk of bias                      | Inconsistency <sup>b</sup> | Indirectness <sup>c</sup> | Imprecision <sup>d</sup>         | Publication bias | Treatment association (95% CI)             |         | Overall quality of evidence |
|-------------------|---------------|--------------------------------|-----------------------------------|----------------------------|---------------------------|----------------------------------|------------------|--------------------------------------------|---------|-----------------------------|
|                   |               |                                |                                   |                            |                           |                                  |                  | antidepressants                            | opioids |                             |
|                   |               |                                |                                   |                            |                           |                                  |                  | RR 2.00 (95%CI 0.40 to 10.05)              |         |                             |
| <b>Drowsiness</b> |               |                                |                                   |                            |                           |                                  |                  |                                            |         |                             |
| 1                 | 56            | 1.25 (5 weeks)                 | Serious risk of bias <sup>e</sup> | No serious inconsistency   | No serious indirectness   | Serious imprecision <sup>f</sup> | Not applicable   | 2 (7.1%)                                   | 7 (25%) | <b>Low</b>                  |
|                   |               |                                |                                   |                            |                           |                                  |                  | Difference: +17.9% (95%CI-0.8% to +36.5% ) |         |                             |
|                   |               |                                |                                   |                            |                           |                                  |                  | RR 3.50 (95%CI 0.80 to 15.40)              |         |                             |



**eTable 10: GRADE evidence profile of opioids vs. tricyclic antidepressants for patients with chronic noncancer pain from 3 randomized clinical trials <sup>a</sup>**

| # of Trials      | # of patients | Duration of follow-up (months) | Risk of bias                      | Inconsistency <sup>b</sup> | Indirectness <sup>c</sup> | Imprecision <sup>d</sup>         | Publication bias | Treatment association (95% CI)          |           | Overall quality of evidence |
|------------------|---------------|--------------------------------|-----------------------------------|----------------------------|---------------------------|----------------------------------|------------------|-----------------------------------------|-----------|-----------------------------|
|                  |               |                                |                                   |                            |                           |                                  |                  | antidepressants                         | opioids   |                             |
| <b>Headache</b>  |               |                                |                                   |                            |                           |                                  |                  |                                         |           |                             |
| 1                | 56            | 1.25 months (5 weeks)          | Serious risk of bias <sup>e</sup> | No serious inconsistency   | No serious indirectness   | Serious imprecision <sup>f</sup> | Not applicable   | 2 (7.1%)                                | 4 (14.3%) | <b>Low</b>                  |
|                  |               |                                |                                   |                            |                           |                                  |                  | Difference: +7.2% (95%CI-9% to +23.2% ) |           |                             |
|                  |               |                                |                                   |                            |                           |                                  |                  | RR 2.00 (95%CI 0.40 to 10.05)           |           |                             |
| <b>Dry mouth</b> |               |                                |                                   |                            |                           |                                  |                  |                                         |           |                             |

**eTable 10: GRADE evidence profile of opioids vs. tricyclic antidepressants for patients with chronic noncancer pain from 3 randomized clinical trials <sup>a</sup>**

| # of Trials | # of patients | Duration of follow-up (months) | Risk of bias                      | Inconsistency <sup>b</sup> | Indirectness <sup>c</sup> | Imprecision <sup>d</sup>         | Publication bias | Treatment association (95% CI)                |           | Overall quality of evidence |
|-------------|---------------|--------------------------------|-----------------------------------|----------------------------|---------------------------|----------------------------------|------------------|-----------------------------------------------|-----------|-----------------------------|
|             |               |                                |                                   |                            |                           |                                  |                  | antidepressants                               | opioids   |                             |
| 1           | 56            | 1.25 (5 weeks)                 | Serious risk of bias <sup>e</sup> | No serious inconsistency   | No serious indirectness   | Serious imprecision <sup>f</sup> | Not applicable   | 10 (35.7%)                                    | 6 (21.4%) | <b>Low</b>                  |
|             |               |                                |                                   |                            |                           |                                  |                  | Difference: +14.3%<br>(95%CI-37.7% to +9.1% ) |           |                             |
|             |               |                                |                                   |                            |                           |                                  |                  | RR 0.60 (95%CI 0.25 to 1.43)                  |           |                             |

WMD: weighted mean difference. RR: relative risk; CI: confidence interval; VAS: visual analogue scale; MID: minimally important difference

- <sup>a</sup>. Pain and physical functioning were reported in The 2017 Canadian Guideline for Opioids for Chronic Non-Cancer Pain, Section Four Initiation and Dosing of Opioids in Patients with Chronic Noncancer Pain, Recommendation 1, When considering therapy for patients with chronic non-cancer pain, we recommend optimization of non-opioid pharmacotherapy and non-pharmacological therapy, rather than a trial of opioids. Available at <https://app.magicapp.org/app#/guideline/2182> ; none of three trials reported incidence of vomiting
- <sup>b</sup>. Inconsistency refers to an unexplained heterogeneity of results. An I<sup>2</sup> of 75-100% indicates that heterogeneity may be considerable
- <sup>c</sup>. Indirectness results if the patients, intervention, control or outcomes are different from the research question under investigation
- <sup>d</sup>. In this review, serious imprecision refers to situations in which the confidence interval includes both benefit and harm

- e. High loss to follow up in all studies (>35%).
- f. Confidence interval includes benefit and harm
- g. Only an end-of-study score was reported, without a baseline score, so the change score cannot be calculated. Thus, there is no baseline risk available to estimate the risk difference between groups

**eTable 11: GRADE evidence profile of opioids vs. anticonvulsants for patients with chronic noncancer pain from 3 randomized clinical trials <sup>a</sup>**

| # of Trials                                                                                                             | # of patients | Duration of follow-up (months) | Risk of bias                      | Inconsistency <sup>b</sup> | Indirectness <sup>c</sup> | Imprecision <sup>d</sup>         | Publication bias | Treatment association (95% CI)               |                            | Overall quality of evidence |
|-------------------------------------------------------------------------------------------------------------------------|---------------|--------------------------------|-----------------------------------|----------------------------|---------------------------|----------------------------------|------------------|----------------------------------------------|----------------------------|-----------------------------|
|                                                                                                                         |               |                                |                                   |                            |                           |                                  |                  | anticonvulsants                              | opioids                    |                             |
| <b>Emotional Functioning: 0 to 100-point SF-36 mental component summary scale; higher is better; the MID = 5-points</b> |               |                                |                                   |                            |                           |                                  |                  |                                              |                            |                             |
| 2                                                                                                                       | 243           | 1-1.5                          | Serious risk of bias <sup>e</sup> | No serious inconsistency   | No serious indirectness   | Serious imprecision <sup>g</sup> | Undetected       | 65 (52.1%) achieve the MID                   | 55 (46.0%) achieve the MID | <b>Low</b>                  |
|                                                                                                                         |               |                                |                                   |                            |                           |                                  |                  | Difference: -6.1%<br>(95%CI -17.1% to +5.2%) |                            |                             |
|                                                                                                                         |               |                                |                                   |                            |                           |                                  |                  | WMD -2.58 points (95%CI -7.34 to +2.18)      |                            |                             |

**eTable 11: GRADE evidence profile of opioids vs. anticonvulsants for patients with chronic noncancer pain from 3 randomized clinical trials <sup>a</sup>**

| # of Trials                                                                                                             | # of patients | Duration of follow-up (months) | Risk of bias                      | Inconsistency <sup>b</sup> | Indirectness <sup>c</sup> | Imprecision <sup>d</sup>         | Publication bias | Treatment association (95% CI)               |                            | Overall quality of evidence |
|-------------------------------------------------------------------------------------------------------------------------|---------------|--------------------------------|-----------------------------------|----------------------------|---------------------------|----------------------------------|------------------|----------------------------------------------|----------------------------|-----------------------------|
|                                                                                                                         |               |                                |                                   |                            |                           |                                  |                  | anticonvulsants                              | opioids                    |                             |
| <b>Role Functioning: 0 to 100-point SF-36 physical role functioning subscale; higher is better; the MID = 10-points</b> |               |                                |                                   |                            |                           |                                  |                  |                                              |                            |                             |
| 2                                                                                                                       | 243           | 1-1.5                          | Serious risk of bias <sup>e</sup> | No serious inconsistency   | No serious indirectness   | Serious imprecision <sup>g</sup> | Undetected       | 65 (52.4%) achieve the MID                   | 62 (52.5%) achieve the MID | <b>Low</b>                  |
|                                                                                                                         |               |                                |                                   |                            |                           |                                  |                  | Difference: +0.1%<br>(95%CI -9.6% to +9.6%)  |                            |                             |
|                                                                                                                         |               |                                |                                   |                            |                           |                                  |                  | WMD +0.03 points<br>(95%CI -11.74 to +11.81) |                            |                             |

**eTable 11: GRADE evidence profile of opioids vs. anticonvulsants for patients with chronic noncancer pain from 3 randomized clinical trials <sup>a</sup>**

| # of Trials                                                                                                             | # of patients | Duration of follow-up (months) | Risk of bias                      | Inconsistency <sup>b</sup> | Indirectness <sup>c</sup> | Imprecision <sup>d</sup>         | Publication bias | Treatment association (95% CI)               |                            | Overall quality of evidence |
|-------------------------------------------------------------------------------------------------------------------------|---------------|--------------------------------|-----------------------------------|----------------------------|---------------------------|----------------------------------|------------------|----------------------------------------------|----------------------------|-----------------------------|
|                                                                                                                         |               |                                |                                   |                            |                           |                                  |                  | anticonvulsants                              | opioids                    |                             |
| <b>Social Functioning: 0 to 100-point SF-36 social role functioning subscale; higher is better; the MID = 10-points</b> |               |                                |                                   |                            |                           |                                  |                  |                                              |                            |                             |
| 2                                                                                                                       | 243           | 1-1.5                          | Serious risk of bias <sup>e</sup> | No serious inconsistency   | No serious indirectness   | Serious imprecision <sup>g</sup> | Undetected       | 59 (47.2%) achieve the MID                   | 57 (48.1%) achieve the MID | <b>Low</b>                  |
|                                                                                                                         |               |                                |                                   |                            |                           |                                  |                  | Difference: +0.9%<br>(95%CI -8.8% to +10.8%) |                            |                             |
|                                                                                                                         |               |                                |                                   |                            |                           |                                  |                  | WMD +0.63 points<br>(95%CI -6.06 to +7.33)   |                            |                             |

**eTable 11: GRADE evidence profile of opioids vs. anticonvulsants for patients with chronic noncancer pain from 3 randomized clinical trials <sup>a</sup>**

| # of Trials                                                                                          | # of patients | Duration of follow-up (months) | Risk of bias                      | Inconsistency <sup>b</sup> | Indirectness <sup>c</sup> | Imprecision <sup>d</sup>         | Publication bias | Treatment association (95% CI)               |                            | Overall quality of evidence |
|------------------------------------------------------------------------------------------------------|---------------|--------------------------------|-----------------------------------|----------------------------|---------------------------|----------------------------------|------------------|----------------------------------------------|----------------------------|-----------------------------|
|                                                                                                      |               |                                |                                   |                            |                           |                                  |                  | anticonvulsants                              | opioids                    |                             |
| <b>Sleep Quality: 100 mm VAS for sleep quality (on the SF-36); higher is better; the MID = 10 mm</b> |               |                                |                                   |                            |                           |                                  |                  |                                              |                            |                             |
| 2                                                                                                    | 243           | 1-1.5                          | Serious risk of bias <sup>e</sup> | No serious inconsistency   | No serious indirectness   | Serious imprecision <sup>g</sup> | Undetected       | 82 (66%) achieve the MID                     | 77 (64.9%) achieve the MID | <b>Low</b>                  |
|                                                                                                      |               |                                |                                   |                            |                           |                                  |                  | Difference: -1.1%<br>(95%CI -11.1% to +7.9%) |                            |                             |
|                                                                                                      |               |                                |                                   |                            |                           |                                  |                  | WMD -1.00 mm<br>(95%CI -9.80 to +7.80)       |                            |                             |

**eTable 11: GRADE evidence profile of opioids vs. anticonvulsants for patients with chronic noncancer pain from 3 randomized clinical trials <sup>a</sup>**

| # of Trials         | # of patients | Duration of follow-up (months) | Risk of bias                      | Inconsistency <sup>b</sup> | Indirectness <sup>c</sup> | Imprecision <sup>d</sup> | Publication bias | Treatment association (95% CI)              |            | Overall quality of evidence |
|---------------------|---------------|--------------------------------|-----------------------------------|----------------------------|---------------------------|--------------------------|------------------|---------------------------------------------|------------|-----------------------------|
|                     |               |                                |                                   |                            |                           |                          |                  | anticonvulsants                             | opioids    |                             |
| <b>Nausea</b>       |               |                                |                                   |                            |                           |                          |                  |                                             |            |                             |
| 2                   | 179           | 1-1.5                          | Serious risk of bias <sup>e</sup> | No serious inconsistency   | No serious indirectness   | No serious imprecision   | Undetected       | 0 (0%)                                      | 13 (14.4%) | <b>Moderate</b>             |
|                     |               |                                |                                   |                            |                           |                          |                  | Difference: +14.4%<br>(95%CI +7% to +21.7%) |            |                             |
|                     |               |                                |                                   |                            |                           |                          |                  | RR 13.74<br>(95%CI 1.85 to 102.24)          |            |                             |
| <b>Constipation</b> |               |                                |                                   |                            |                           |                          |                  |                                             |            |                             |



**eTable 11: GRADE evidence profile of opioids vs. anticonvulsants for patients with chronic noncancer pain from 3 randomized clinical trials <sup>a</sup>**

| # of Trials      | # of patients | Duration of follow-up (months) | Risk of bias                      | Inconsistency <sup>b</sup> | Indirectness <sup>c</sup> | Imprecision <sup>d</sup>         | Publication bias | Treatment association (95% CI)             |           | Overall quality of evidence |
|------------------|---------------|--------------------------------|-----------------------------------|----------------------------|---------------------------|----------------------------------|------------------|--------------------------------------------|-----------|-----------------------------|
|                  |               |                                |                                   |                            |                           |                                  |                  | anticonvulsants                            | opioids   |                             |
| 3                | 342           | 1-1.5                          | Serious risk of bias <sup>e</sup> | No serious inconsistency   | No serious indirectness   | No serious imprecision           | Undetected       | 2 (1.2%)                                   | 15 (9.0%) | <b>Moderate</b>             |
|                  |               |                                |                                   |                            |                           |                                  |                  | Difference: +7.8%<br>(95%CI +0.3% to +56%) |           |                             |
|                  |               |                                |                                   |                            |                           |                                  |                  | RR 7.77 (95%CI 1.22 to 49.43)              |           |                             |
| <b>Dizziness</b> |               |                                |                                   |                            |                           |                                  |                  |                                            |           |                             |
| 2                | 277           | 1-1.5                          |                                   | No serious inconsistency   | No serious indirectness   | Serious imprecision <sup>g</sup> | Undetected       | 8 (5.7%)                                   | 9 (6.7%)  | <b>Low</b>                  |

**eTable 11: GRADE evidence profile of opioids vs. anticonvulsants for patients with chronic noncancer pain from 3 randomized clinical trials <sup>a</sup>**

| # of Trials       | # of patients | Duration of follow-up (months) | Risk of bias                      | Inconsistency <sup>b</sup> | Indirectness <sup>c</sup> | Imprecision <sup>d</sup>         | Publication bias | Treatment association (95% CI)               |          | Overall quality of evidence |
|-------------------|---------------|--------------------------------|-----------------------------------|----------------------------|---------------------------|----------------------------------|------------------|----------------------------------------------|----------|-----------------------------|
|                   |               |                                |                                   |                            |                           |                                  |                  | anticonvulsants                              | opioids  |                             |
|                   |               |                                | Serious risk of bias <sup>f</sup> |                            |                           |                                  |                  | Difference: +1.0%<br>(95%CI -2.9% to +10.5%) |          |                             |
|                   |               |                                |                                   |                            |                           |                                  |                  | RR 1.18 (95%CI 0.49 to 2.85)                 |          |                             |
| <b>Drowsiness</b> |               |                                |                                   |                            |                           |                                  |                  |                                              |          |                             |
| 2                 | 228           | 1-1.5                          |                                   | No serious inconsistency   | No serious indirectness   | Serious imprecision <sup>g</sup> | Undetected       | 13 (11.2%)                                   | 8 (6.8%) | <b>Low</b>                  |

**eTable 11: GRADE evidence profile of opioids vs. anticonvulsants for patients with chronic noncancer pain from 3 randomized clinical trials <sup>a</sup>**

| # of Trials     | # of patients | Duration of follow-up (months) | Risk of bias                      | Inconsistency <sup>b</sup> | Indirectness <sup>c</sup> | Imprecision <sup>d</sup>         | Publication bias | Treatment association (95% CI)              |          | Overall quality of evidence |
|-----------------|---------------|--------------------------------|-----------------------------------|----------------------------|---------------------------|----------------------------------|------------------|---------------------------------------------|----------|-----------------------------|
|                 |               |                                |                                   |                            |                           |                                  |                  | anticonvulsants                             | opioids  |                             |
|                 |               |                                | Serious risk of bias <sup>e</sup> |                            |                           |                                  |                  | Difference: -4.4%<br>(95%CI -8.1% to +6.0%) |          |                             |
|                 |               |                                |                                   |                            |                           |                                  |                  | RR 0.61 (95%CI 0.28 to 1.36)                |          |                             |
| <b>Headache</b> |               |                                |                                   |                            |                           |                                  |                  |                                             |          |                             |
| 1               | 114           | 1-1.5                          | No serious                        | No serious inconsistency   | No serious indirectness   | Serious imprecision <sup>g</sup> | Not applicable   | 0 (0%)                                      | 1 (1.8%) | <b>Moderate</b>             |

**eTable 11: GRADE evidence profile of opioids vs. anticonvulsants for patients with chronic noncancer pain from 3 randomized clinical trials <sup>a</sup>**

| # of Trials     | # of patients | Duration of follow-up (months) | Risk of bias            | Inconsistency <sup>b</sup> | Indirectness <sup>c</sup> | Imprecision <sup>d</sup>         | Publication bias | Treatment association (95% CI)               |         | Overall quality of evidence |
|-----------------|---------------|--------------------------------|-------------------------|----------------------------|---------------------------|----------------------------------|------------------|----------------------------------------------|---------|-----------------------------|
|                 |               |                                |                         |                            |                           |                                  |                  | anticonvulsants                              | opioids |                             |
|                 |               |                                | risk of bias            |                            |                           |                                  |                  | Difference: +1.8%<br>(95%CI -3.1% to +6.6%)  |         |                             |
|                 |               |                                |                         |                            |                           |                                  |                  | RR 3.00 (95%CI 0.12 to 72.13)                |         |                             |
| <b>Pruritus</b> |               |                                |                         |                            |                           |                                  |                  |                                              |         |                             |
| 1               | 114           | 1-1.5                          | No serious risk of bias | No serious inconsistency   | No serious indirectness   | Serious imprecision <sup>g</sup> | Not applicable   | 1 (1.8%)                                     | 4 (7%)  | <b>Moderate</b>             |
|                 |               |                                |                         |                            |                           |                                  |                  | Difference: +5.2%<br>(95%CI -0.9% to +59.1%) |         |                             |

**eTable 11: GRADE evidence profile of opioids vs. anticonvulsants for patients with chronic noncancer pain from 3 randomized clinical trials <sup>a</sup>**

| # of Trials      | # of patients | Duration of follow-up (months) | Risk of bias            | Inconsistency <sup>b</sup> | Indirectness <sup>c</sup> | Imprecision <sup>d</sup>         | Publication bias | Treatment association (95% CI)               |          | Overall quality of evidence |
|------------------|---------------|--------------------------------|-------------------------|----------------------------|---------------------------|----------------------------------|------------------|----------------------------------------------|----------|-----------------------------|
|                  |               |                                |                         |                            |                           |                                  |                  | anticonvulsants                              | opioids  |                             |
|                  |               |                                |                         |                            |                           |                                  |                  | RR 4.00 (95%CI 0.46 to 34.70)                |          |                             |
| <b>Dry mouth</b> |               |                                |                         |                            |                           |                                  |                  |                                              |          |                             |
| 1                | 114           | 1-1.5                          | No serious risk of bias | No serious inconsistency   | No serious indirectness   | Serious imprecision <sup>g</sup> | Not applicable   | 4 (7%)                                       | 3 (5.3%) | <b>Moderate</b>             |
|                  |               |                                |                         |                            |                           |                                  |                  | Difference: -1.7%<br>(95%CI -5.8% to +15.4%) |          |                             |
|                  |               |                                |                         |                            |                           |                                  |                  | RR 0.75 (95%CI 0.18 to 3.20)                 |          |                             |

WMD: weighted mean difference. RR: relative risk; CI: confidence interval; VAS: visual analogue scale; MID: minimally important difference

- a. Pain and physical functioning were reported in The 2017 Canadian Guideline for Opioids for Chronic Non-Cancer Pain, Section Four Initiation and Dosing of Opioids in Patients with Chronic Noncancer Pain, Recommendation 1, When considering therapy for patients with chronic non-cancer pain, we recommend optimization of non-opioid pharmacotherapy and non-pharmacological therapy, rather than a trial of opioids. Available at <https://app.magicapp.org/app#/guideline/2182>; zero events for vomiting was reported in both groups in one trial (Gilron 2005)
- b. Inconsistency refers to an unexplained heterogeneity of results. An  $I^2$  of 75-100% indicates that heterogeneity may be considerable
- c. Indirectness results if the intervention, patients or outcomes are different from the research question under investigation
- d. In this review, serious imprecision refers to situations in which the confidence interval includes both benefit and harm
- e. Two (Sakai et al 2015, Ko et al 2010) out of three studies had no allocation concealment and no blinding; and one study (Ko et al., 2010) had high loss to follow-up (25%)
- f. One out of two studies (Sakai et al 2015 or Ko et al 2010) had no allocation concealment and no blinding; and one study (Ko et al., 2010) had high loss to follow-up (25%)
- g. Wide confidence intervals which include benefit and harm

**eTable 12: GRADE evidence profile of opioids vs. nabilone for patients with chronic noncancer pain from 1 randomized clinical trial<sup>a</sup>**

| # of Trials                                                                                                                         | # of patients | Duration of follow-up (months) | Risk of bias                      | Inconsistency <sup>b</sup> | Indirectness <sup>c</sup> | Imprecision <sup>d</sup>         | Publication bias | Treatment association (95% CI)          |         | Overall quality of evidence |
|-------------------------------------------------------------------------------------------------------------------------------------|---------------|--------------------------------|-----------------------------------|----------------------------|---------------------------|----------------------------------|------------------|-----------------------------------------|---------|-----------------------------|
|                                                                                                                                     |               |                                |                                   |                            |                           |                                  |                  | nabilone                                | opioids |                             |
| <b>Emotional Functioning: 0 to 100-point SF-36 mental component summary scale; higher is better; the MID = 5-points<sup>e</sup></b> |               |                                |                                   |                            |                           |                                  |                  |                                         |         |                             |
| 1                                                                                                                                   | 71            | 1.5 (6 weeks)                  | Serious risk of bias <sup>f</sup> | No serious inconsistency   | No serious indirectness   | Serious imprecision <sup>g</sup> | Not applicable   | WMD +2.50 point (95%CI -2.70 to +7.60 ) |         | <b>Low</b>                  |
| <b>Role Functioning: 0 to 100-point SF-36 physical role functioning subscale; higher is better; the MID = 10-points<sup>e</sup></b> |               |                                |                                   |                            |                           |                                  |                  |                                         |         |                             |
| 1                                                                                                                                   | 71            | 1.5 (6 weeks)                  | Serious risk of bias <sup>f</sup> | No serious inconsistency   | No serious indirectness   | No serious imprecision           | Not applicable   | WMD +8.9 point (95%CI +1.1 to +16.7 )   |         | <b>Moderate</b>             |
| <b>Social Functioning: 0 to 100-point SF-36 social role functioning subscale; higher is better; the MID = 10-points<sup>e</sup></b> |               |                                |                                   |                            |                           |                                  |                  |                                         |         |                             |

**eTable 12: GRADE evidence profile of opioids vs. nabilone for patients with chronic noncancer pain from 1 randomized clinical trial<sup>a</sup>**

| # of Trials | # of patients | Duration of follow-up (months) | Risk of bias                      | Inconsistency <sup>b</sup> | Indirectness <sup>c</sup> | Imprecision <sup>d</sup>         | Publication bias | Treatment association (95% CI)       |         | Overall quality of evidence |
|-------------|---------------|--------------------------------|-----------------------------------|----------------------------|---------------------------|----------------------------------|------------------|--------------------------------------|---------|-----------------------------|
|             |               |                                |                                   |                            |                           |                                  |                  | nabilone                             | opioids |                             |
| 1           | 71            | 1.5 (6 weeks)                  | Serious risk of bias <sup>f</sup> | No serious inconsistency   | No serious indirectness   | Serious imprecision <sup>g</sup> | Not applicable   | WMD +3.4 point (95%CI -4.1 to +10.8) |         | <b>Low</b>                  |

WMD: weighted mean difference. RR: relative risk; CI: confidence interval; VAS: visual analogue scale; MID: minimally important difference

- <sup>a</sup>. Pain and physical functioning were reported in The 2017 Canadian Guideline for Opioids for Chronic Non-Cancer Pain, Section Four Initiation and Dosing of Opioids in Patients with Chronic Noncancer Pain, Recommendation 1, When considering therapy for patients with chronic non-cancer pain, we recommend optimization of non-opioid pharmacotherapy and non-pharmacological therapy, rather than a trial of opioids. Available at <https://app.magicapp.org/app#/guideline/2182>
- <sup>b</sup>. Inconsistency refers to an unexplained heterogeneity of results. An  $I^2$  of 75-100% indicates that heterogeneity may be considerable
- <sup>c</sup>. Indirectness results if the patients, intervention, control or outcomes are different from the research question under investigation
- <sup>d</sup>. A In this review, serious imprecision refers to situations in which the confidence interval includes both benefit and harm
- <sup>e</sup>. Only mean & 95%CI were reported - there is no baseline risk available to estimate the risk difference between groups
- <sup>f</sup>. Did not report randomization or allocation; loss to follow-up was 24%; the trial reported a benefit for pain relief in favor of opioids (mean difference 0.6 cm on the 10 cm VAS for pain (95%CI 0.14 to 1.05); however, it is not clear how this result was calculated. When we calculated the effect on pain, based on change scores reported for the 10 cm VAS for pain, we found no significant effect (and this is what we have reported). Contact with the lead author of the trial was unable to resolve this issue.
- <sup>g</sup>. Confidence interval includes benefit and harm



**eTable 13: GRADE evidence profile of opioids vs. usual care for patients with chronic noncancer pain from 1 randomized clinical trial**

| # of Trials                                                      | # of patients | Duration of follow-up (months) | Risk of bias                           | Inconsistency <sup>a</sup> | Indirectness <sup>b</sup> | Imprecision <sup>c</sup> | Publication bias | Treatment association (95% CI)           |                            | Overall quality of evidence |
|------------------------------------------------------------------|---------------|--------------------------------|----------------------------------------|----------------------------|---------------------------|--------------------------|------------------|------------------------------------------|----------------------------|-----------------------------|
|                                                                  |               |                                |                                        |                            |                           |                          |                  | Usual care                               | opioids                    |                             |
| <b>Pain: 10 cm VAS for pain; lower is better; the MID = 1 cm</b> |               |                                |                                        |                            |                           |                          |                  |                                          |                            |                             |
| 1                                                                | 111           | 1.5                            | Very serious risk of bias <sup>d</sup> | No serious inconsistency   | No serious indirectness   | No serious imprecision   | Undetected;      | 26 (77.4%) achieve the MID               | 77 (98.5%) achieve the MID | <b>Low</b>                  |
|                                                                  |               |                                |                                        |                            |                           |                          |                  | Difference: 21.1% (95%CI 18.7% to 22.1%) |                            |                             |
|                                                                  |               |                                |                                        |                            |                           |                          |                  | WMD -2.06 cm (95%CI -2.65 to -1.48)      |                            |                             |

**eTable 13: GRADE evidence profile of opioids vs. usual care for patients with chronic noncancer pain from 1 randomized clinical trial**

| # of Trials                                                                                                    | # of patients | Duration of follow-up (months) | Risk of bias                           | Inconsistency <sup>a</sup> | Indirectness <sup>b</sup> | Imprecision <sup>c</sup> | Publication bias | Treatment association (95% CI)            |                            | Overall quality of evidence |
|----------------------------------------------------------------------------------------------------------------|---------------|--------------------------------|----------------------------------------|----------------------------|---------------------------|--------------------------|------------------|-------------------------------------------|----------------------------|-----------------------------|
|                                                                                                                |               |                                |                                        |                            |                           |                          |                  | Usual care                                | opioids                    |                             |
| <b>Role Functioning: 0 to 100-point SF-36 role functioning subscale; higher is better; the MID = 10-points</b> |               |                                |                                        |                            |                           |                          |                  |                                           |                            |                             |
| 1                                                                                                              | 111           | 1.5                            | Very serious risk of bias <sup>d</sup> | No serious inconsistency   | No serious indirectness   | No serious imprecision   | Undetected;      | 14 (43.7%) achieve the MID                | 51 (65.4%) achieve the MID | <b>Low</b>                  |
|                                                                                                                |               |                                |                                        |                            |                           |                          |                  | Difference: 21.7% (95%CI 5.7% to 35.4%)   |                            |                             |
|                                                                                                                |               |                                |                                        |                            |                           |                          |                  | WMD +11.67 points (95%CI +3.00 to +20.34) |                            |                             |

WMD: weighted mean difference. RR: relative risk; CI: confidence interval; VAS: visual analogue scale; MID: minimally important difference

- a. Inconsistency refers to an unexplained heterogeneity of results. An  $I^2$  of 75-100% indicates that heterogeneity may be considerable
- b. Indirectness results if the intervention, patients or outcomes are different from the research question under investigation
- c. In this review, serious imprecision refers to situations in which the confidence interval includes both benefit and harm
- d. Did not report how their randomization sequence was generated, or if allocation was concealed, healthcare providers, outcome assessors, and adjudicators were unblinded, and there was 28% loss to follow-up

**eTable 14: Results of within-trial comparisons of different opioid doses**

| Study,<br>Clinical condition                                            | Interventions and Outcomes          |                          |                        |                                                      |            |              |
|-------------------------------------------------------------------------|-------------------------------------|--------------------------|------------------------|------------------------------------------------------|------------|--------------|
|                                                                         | Treatment arm, (no. of patients)    | Pain                     | Physical Function      | Gastrointestinal adverse events, no. of patients (%) |            |              |
|                                                                         |                                     |                          |                        | nausea                                               | vomiting   | constipation |
| Fishman 2007 <sup>30</sup> ,<br>Osteoarthritis                          | Placebo (224)                       | 204.5 <sup>a</sup>       | 27% <sup>b</sup>       | 13 (5.7%)                                            | 1 (0.4%)   | 3 (1.3%)     |
|                                                                         | Tramadol Contramid OAD 100 mg (103) | 166.9 <sup>a</sup>       | 48% <sup>b</sup>       | 12 (11.3%)                                           | 4 (3.8%)   | 12 (11.3%)   |
|                                                                         | Tramadol Contramid OAD 200 mg (107) | 161.8 <sup>a</sup>       | 45% <sup>b</sup>       | 22 (19.8%)                                           | 6 (5.4%)   | 16 (14.4%)   |
|                                                                         | Tramadol Contramid OAD 300 mg (105) | 169.8 <sup>a</sup>       | 46% <sup>b</sup>       | 28 (25.9%)                                           | 16 (14.8%) | 11 (10.2%)   |
| Vorsanger 2008 <sup>37</sup> ,<br>Low back pain not otherwise specified | Placebo                             | +12.2 <sup>c</sup>       | 9.8 <sup>d</sup>       | 36 (27.9%)                                           | 9 (7.0%)   | 25 (19.1%)   |
|                                                                         | Tramadol ER 200 mg (128)            | +7.8 <sup>c</sup>        | 8.5 <sup>d</sup>       | 35 (27.1%)                                           | 10 (7.8%)  | 33 (25.6%)   |
|                                                                         | Tramadol ER 300 mg (129)            | +5.2 <sup>c</sup>        | 8.2 <sup>d</sup>       | 37 (28.9%)                                           | 9 (7.0%)   | 30 (23.4%)   |
| Gana 2006 <sup>25</sup> ,<br>Osteoarthritis                             | Placebo (205)                       | 74.2 ± 8.5 <sup>e</sup>  | 2.4 ± 0.6 <sup>f</sup> | 15 (7.3%)                                            | 6 (2.9%)   | 12 (5.9%)    |
|                                                                         | Tramadol ER 100 mg (202)            | 107.2 ± 8.6 <sup>e</sup> | 3.6 ± 0.6 <sup>f</sup> | 30 (14.9%)                                           | 11 (5.4%)  | 26 (12.9%)   |
|                                                                         | Tramadol ER 200 mg (201)            | 111.5 ± 8.7 <sup>e</sup> | 3.9 ± 0.6 <sup>f</sup> | 47 (23.4%)                                           | 15 (7.5%)  | 33 (16.4%)   |
|                                                                         | Tramadol ER 300 mg (201)            | 103.9 ± 8.7 <sup>e</sup> | 3.6 ± 0.6 <sup>f</sup> | 49 (24.4%)                                           | 14 (7.0%)  | 45 (22.4%)   |

**eTable 14: Results of within-trial comparisons of different opioid doses**

| Study,<br>Clinical condition                                                     | Interventions and Outcomes       |                                              |                           |                                                      |            |              |
|----------------------------------------------------------------------------------|----------------------------------|----------------------------------------------|---------------------------|------------------------------------------------------|------------|--------------|
|                                                                                  | Treatment arm, (no. of patients) | Pain                                         | Physical Function         | Gastrointestinal adverse events, no. of patients (%) |            |              |
|                                                                                  |                                  |                                              |                           | nausea                                               | vomiting   | constipation |
|                                                                                  | Tramadol ER 400 mg (202)         | 107.8 ± 8.7 <sup>e</sup>                     | 3.2 ± 0.6 <sup>f</sup>    | 52 (25.7%)                                           | 19 (9.4%)  | 60 (29.7%)   |
| Rauck 2013 <sup>57</sup> ,<br>Osteoarthritis                                     | Placebo (332)                    | -1.9 ± 0.16 <sup>g</sup>                     | 1.3 ± 0.11 <sup>h</sup>   | 32 (9.6%)                                            | 7 (2.1%)   | 39 (11.7%)   |
|                                                                                  | Hydromorphone ER 8 mg (319)      | -2.0 ± 0.16 <sup>g</sup>                     | -1.6 ± 0.11 <sup>h</sup>  | 96 (30.1%)                                           | 29 (9.1%)  | 131 (41.1%)  |
|                                                                                  | Hydromorphone ER16 mg (330)      | -2.5 ± 0.16 <sup>g</sup>                     | -1.7 ± 0.11 <sup>h</sup>  | 120 (36.4%)                                          | 38 (11.5%) | 155 (47.0%)  |
| DeLemos 2011 <sup>93</sup> ,<br>Osteoarthritis                                   | Placebo (200)                    | 16.5 ± 1.9 <sup>i</sup>                      | 3.0 ± 0.6 <sup>i</sup>    | 17 (8.5%)                                            | 5 (2.5%)   | 5 (2.5%)     |
|                                                                                  | Tramadol ER 100 mg (201)         | 16.7 ± 1.8 <sup>i</sup>                      | 2.8 ± 0.6 <sup>i</sup>    | 31 (15.4%)                                           | 9 (4.5%)   | 23 (11.4%)   |
|                                                                                  | Tramadol ER 200 mg (199)         | 21.6 ± 1.8 <sup>i</sup>                      | 3.1 ± 0.6 <sup>i</sup>    | 41 (20.6%)                                           | 14 (7.0%)  | 35 (17.6%)   |
|                                                                                  | Tramadol ER 300 mg (199)         | 25.7 ± 1.8 <sup>i</sup>                      | 3.5 ± 0.6 <sup>i</sup>    | 52 (26.1%)                                           | 20 (10.1%) | 40 (20.1%)   |
| Christoph 2017 <sup>74</sup> ,<br>Chronic low back pain<br>of mixed presentation | Placebo (126)                    | -2.16<br>(95%CI -2.58 to -1.74) <sup>k</sup> | -12.8 ± 16.2 <sup>l</sup> | 2 (1.5%)                                             | 5 (3.8%)   | 5 (4.1%)     |
|                                                                                  | Cebranopadol 200 µg (131)        | -2.95<br>(95%CI -3.41 to -2.50) <sup>k</sup> | -17.7 ± 19.3 <sup>l</sup> | 12 (9.1%)                                            | 8 (6.2%)   | 10 (7.7%)    |
|                                                                                  | Cebranopadol 400 µg (128)        | -2.95<br>(95%CI -3.44 to -2.47) <sup>k</sup> | -14.9 ± 17.4 <sup>l</sup> | 7(5.6%)                                              | 10 (7.7%)  | 10 (7.7%)    |

**eTable 14: Results of within-trial comparisons of different opioid doses**

| Study,<br>Clinical condition | Interventions and Outcomes       |                                              |                           |                                                      |          |              |
|------------------------------|----------------------------------|----------------------------------------------|---------------------------|------------------------------------------------------|----------|--------------|
|                              | Treatment arm, (no. of patients) | Pain                                         | Physical Function         | Gastrointestinal adverse events, no. of patients (%) |          |              |
|                              |                                  |                                              |                           | nausea                                               | vomiting | constipation |
|                              | Cebranopadol 600 µg (130)        | -3.18<br>(95%CI -3.70 to -2.66) <sup>k</sup> | -17.6 ± 14.5 <sup>l</sup> | 7(5.6%)                                              | 6 (5.0%) | 12 (9.4%)    |

ER: extended release; NRS: numerical rating scale; WOMAC: Western Ontario and McMaster Universities Osteoarthritis Index

<sup>a</sup> Pain measured on the 0 - 500 WOMAC pain subscale at week 12

<sup>b</sup> Physical functioning measured on the 0 – 1700 WOMAC physical function subscale at week 12

<sup>c</sup> Pain Measured as pain increase at 12 weeks from baseline on the 100mm VAS (no difference between tramadol ER 300mg and 200mg; p = 0.481) No standard deviation was provided

<sup>d</sup> Physical functioning measured with Roland Disability index scores (no difference between tramadol ER 300 mg and 200mg; p = 0.125) No standard deviation was provided

<sup>e</sup> Pain measured at week 12 on the WOMAC pain 0-500 scale (no significant difference between different tramadol ER doses)

<sup>f</sup> Physical functioning measured using the SF-36 physical component score (no significant difference between different doses of tramadol; p= 0.403)

<sup>g</sup> Pain measured as reduction at 12 weeks from baseline on the 11-point NRS pain scale

<sup>h</sup> Physical function measured on the WOMAC physical function score

<sup>i</sup> Pain reduction at 12 weeks from baseline on the 100mm VAS

<sup>j</sup> SF-36 Physical component score (no significant difference between treatment groups)

<sup>k</sup> Mean change from baseline pain to week 14 with the 11-point NRS for pain

<sup>l</sup> Mean change from baseline to week 14 with the Oswestry Disability Index

**eTable 15a: Subgroup analyses for pain, physical and emotional functioning for randomized clinical trials of opioids vs. placebo**

| Subgroup factors                           |                          | Pain           |       |       |       | Physical functioning |                |      |       | Emotional functioning |                     |                |       |       |      |                     |
|--------------------------------------------|--------------------------|----------------|-------|-------|-------|----------------------|----------------|------|-------|-----------------------|---------------------|----------------|-------|-------|------|---------------------|
|                                            |                          | No. of studies | WMD   | 95%CI |       | Inter-action test p  | No. of studies | WMD  | 95%CI |                       | Inter-action test p | No. of studies | WMD   | 95%CI |      | Inter-action test p |
| Treatment effect                           | Change score reported    | 50             | -0.73 | -0.86 | -0.59 | 0.11                 | 36             | 1.74 | 0.99  | 2.48                  | 0.23                | 23             | -0.44 | -1.09 | 0.20 | <b>0.01</b>         |
|                                            | Change score converted   | 30             | -0.93 | -1.12 | -0.75 |                      | 15             | 2.75 | 1.61  | 3.89                  |                     | 14             | 1.70  | -0.06 | 3.46 |                     |
| Length of follow-up                        | < 3 months               | 38             | -0.97 | -1.16 | -0.78 | <b>0.04</b>          | 22             | 2.34 | 1.21  | 3.47                  | 0.61                | 20             | 0.43  | -1.04 | 1.89 | 0.72                |
|                                            | ≥ 3 months               | 42             | -0.69 | -0.82 | -0.56 |                      | 29             | 1.92 | 1.13  | 2.70                  |                     | 17             | 0.05  | -0.79 | 0.89 |                     |
| Clinical condition category 1 <sup>a</sup> | Objective                | 49             | -0.77 | -0.93 | -0.61 | 0.45                 | 30             | 1.73 | 0.95  | 2.52                  | 0.42                | 21             | -0.64 | -1.33 | 0.04 | 0.05 <sup>b</sup>   |
|                                            | Subjective               | 27             | -0.85 | -1.01 | -0.69 |                      | 19             | 2.51 | 1.48  | 3.55                  |                     | 15             | 1.17  | -0.16 | 2.49 |                     |
| Clinical condition category 2 <sup>a</sup> | Neuropathic              | 24             | -0.97 | -1.19 | -0.75 | 0.18                 | 12             | 1.87 | 1.16  | 2.58                  | 0.37                | 12             | 0.14  | -1.11 | 1.40 | 0.05 <sup>b</sup>   |
|                                            | Nociceptive              | 25             | -0.61 | -0.80 | -0.42 |                      | 18             | 1.72 | 0.65  | 2.79                  |                     | 9              | -0.83 | -1.63 | 0.04 |                     |
|                                            | Central sensitization    | 27             | -0.85 | -1.01 | -0.69 |                      | 19             | 2.51 | 1.48  | 3.55                  |                     | 15             | 1.17  | -0.16 | 2.49 |                     |
| Clinical condition category 3 <sup>a</sup> | Neuropathic              | 24             | -0.97 | -1.19 | -0.75 | 0.13                 | 12             | 1.87 | 1.16  | 2.58                  | 0.98                | 12             | 0.14  | -1.11 | 1.40 | 0.62                |
|                                            | Non-neuropathic          | 52             | -0.74 | -0.87 | -0.61 |                      | 37             | 2.15 | 1.36  | 2.94                  |                     | 24             | 0.25  | -0.59 | 1.10 |                     |
| Randomization                              | Adequate randomization   | 44             | -0.75 | -0.90 | -0.59 | 0.37                 | 34             | 1.98 | 1.22  | 2.75                  | 0.93                | 24             | -0.51 | -1.29 | 0.28 | 0.15 <sup>b</sup>   |
|                                            | Inadequate randomization | 36             | -0.83 | -0.99 | -0.68 |                      | 17             | 2.18 | 1.02  | 3.34                  |                     | 13             | 1.34  | 0.00  | 2.68 |                     |
| Allocation concealment                     | Adequate concealment     | 49             | -0.80 | -0.93 | -0.66 | 0.99                 | 33             | 1.67 | 1.00  | 2.35                  | 0.17                | 24             | -0.34 | -1.09 | 0.41 | 0.12                |
|                                            | Inadequate concealment   | 31             | -0.78 | -0.97 | -0.60 |                      | 18             | 3.13 | 1.67  | 4.58                  |                     | 13             | 1.00  | -0.50 | 2.49 |                     |

**eTable 15a: Subgroup analyses for pain, physical and emotional functioning for randomized clinical trials of opioids vs. placebo**

| Subgroup factors                  |                   | Pain           |       |       |       | Physical functioning |                |      |       | Emotional functioning |                     |                |       |       |      |                     |
|-----------------------------------|-------------------|----------------|-------|-------|-------|----------------------|----------------|------|-------|-----------------------|---------------------|----------------|-------|-------|------|---------------------|
|                                   |                   | No. of studies | WMD   | 95%CI |       | Inter-action test p  | No. of studies | WMD  | 95%CI |                       | Inter-action test p | No. of studies | WMD   | 95%CI |      | Inter-action test p |
| Blinding of patients              | Yes               | 79             |       |       |       | NA                   | 51             |      |       |                       | NA                  | 37             |       |       |      | NA                  |
|                                   | No                | 1              |       |       |       |                      | 0              |      |       |                       |                     | 0              |       |       |      |                     |
| Blinding of health care providers | Yes               | 78             | -0.79 | -0.91 | -0.68 | 0.96                 | 50             |      |       |                       | NA                  | 37             |       |       |      | NA                  |
|                                   | No                | 2              | -0.83 | -1.42 | -0.24 |                      | 1              |      |       |                       |                     | 0              |       |       |      |                     |
| Blinding of data collectors       | Yes               | 77             | -0.80 | -0.91 | -0.68 | 0.83                 | 51             |      |       |                       | NA                  | 37             |       |       |      | NA                  |
|                                   | No                | 3              | -0.74 | -1.50 | 0.02  |                      | 0              |      |       |                       |                     | 0              |       |       |      |                     |
| Blinding of outcome assessors     | Yes               | 75             | -0.81 | -0.93 | -0.69 | 0.38                 | 49             | 2.05 | 1.39  | 2.71                  | 1.00                | 36             |       |       |      | NA                  |
|                                   | No                | 5              | -0.50 | -0.72 | -0.27 |                      | 2              | 2.04 | -0.34 | 4.42                  |                     | 1              |       |       |      |                     |
| Blinding of data analyst          | Yes               | 5              | -1.03 | -1.57 | -0.49 | 0.36                 | 3              | 2.29 | -5.68 | 10.25                 | 0.48                | 1              |       |       |      | NA                  |
|                                   | No                | 75             | -0.77 | -0.89 | -0.66 |                      | 48             | 2.07 | 1.45  | 2.69                  |                     | 36             |       |       |      |                     |
| Trial design                      | Parallel trials   | 64             | -0.76 | -0.88 | -0.64 | 0.24                 | 42             | 2.27 | 1.53  | 3.01                  | 0.29                | 27             | 0.11  | -0.71 | 0.92 | 0.80                |
|                                   | Cross-over trials | 16             | -0.97 | -1.25 | -0.69 |                      | 9              | 1.29 | 0.53  | 2.04                  |                     | 10             | 0.57  | -1.03 | 2.17 |                     |
| Enrichment trial                  | Yes               | 23             | -0.84 | -1.02 | -0.67 | 0.52                 | 13             | 2.20 | 1.04  | 3.36                  | 0.94                | 8              | -0.01 | -1.85 | 1.83 | 0.85                |
|                                   | No                | 57             | -0.77 | -0.91 | -0.62 |                      | 38             | 2.01 | 1.27  | 2.75                  |                     | 29             | 0.14  | -0.65 | 0.93 |                     |
| Type of opioid intervention       | Opioids alone     | 67             | -0.79 | -0.91 | -0.67 | 0.73                 | 45             | 2.05 | 1.33  | 2.78                  | 0.93                | 31             | -0.17 | -0.98 | 0.65 | 0.12                |
|                                   | Combination       | 7              | -0.72 | -0.96 | -0.48 |                      | 6              | 2.17 | 1.21  | 3.13                  |                     | 6              | 1.31  | 0.33  | 2.29 |                     |

WMD: Weighted mean difference; 95%CI: 95% confidence interval; NA: not applicable as no subgroup analysis was conducted for less than 2 studies in a given subgroup.

<sup>a</sup> We excluded one to four trials with mixed clinical conditions from subgroup analysis for different clinical conditions.

<sup>b</sup> p-value from multivariable meta-regression.

Significant subgroup effects are **bolded**.



**eTable 15b: Subgroup analyses for role and social functioning, and sleep quality for randomized clinical trials of opioids vs. placebo**

| Subgroup factors                           |                          | Role functioning |      |       |      | Social functioning  |                |       |       | Sleep quality |                          |                |      |       |       |                          |
|--------------------------------------------|--------------------------|------------------|------|-------|------|---------------------|----------------|-------|-------|---------------|--------------------------|----------------|------|-------|-------|--------------------------|
|                                            |                          | No. of studies   | WMD  | 95%CI |      | Inter-action test p | No. of studies | WMD   | 95%CI |               | Inter-action test p      | No. of studies | WMD  | 95%CI |       | Inter-action test p      |
| Treatment effect                           | Change score reported    | 16               | 0.87 | -0.54 | 2.28 | <b>0.007</b>        | 17             | 1.00  | -0.08 | 2.08          | 0.09                     | 20             | 3.86 | 2.13  | 5.59  | 0.15                     |
|                                            | Change score converted   | 16               | 5.79 | 2.69  | 8.88 |                     | 12             | 3.28  | 0.71  | 5.85          |                          | 11             | 7.14 | 2.86  | 11.42 |                          |
| Length of follow-up                        | < 3 months               | 19               | 3.15 | 0.21  | 6.09 | 0.90                | 17             | 3.01  | 0.75  | 5.28          | 0.07                     | 16             | 7.51 | 4.89  | 10.12 | <b>0.03</b> <sup>b</sup> |
|                                            | ≥ 3 months               | 13               | 2.45 | 0.28  | 4.63 |                     | 12             | 0.85  | -0.16 | 1.85          |                          | 15             | 3.42 | 1.58  | 5.26  |                          |
| Clinical condition category 1 <sup>a</sup> | Objective                | 18               | 1.51 | 0.12  | 2.89 | 0.19                | 17             | 0.49  | -0.72 | 1.70          | 0.06                     | 22             | 5.11 | 3.33  | 6.89  | 0.10 <sup>b</sup>        |
|                                            | Subjective               | 11               | 4.59 | 0.95  | 8.22 |                     | 11             | 2.91  | 1.14  | 4.68          |                          | 7              | 0.65 | -0.74 | 2.05  |                          |
| Clinical condition category 2 <sup>a</sup> | Neuropathic              | 12               | 1.80 | 0.20  | 3.39 | 0.22                | 11             | 2.03  | 0.35  | 3.71          | <b>0.01</b> <sup>c</sup> | 10             | 5.07 | 1.54  | 8.60  | 0.07 <sup>b</sup>        |
|                                            | Nociceptive              | 6                | 2.04 | -2.57 | 6.65 |                     | 6              | -1.03 | -2.69 | 0.63          |                          | 12             | 5.20 | 3.04  | 7.35  |                          |
|                                            | Central sensitization    | 11               | 4.59 | 0.95  | 8.22 |                     | 11             | 2.91  | 1.14  | 4.68          |                          | 7              | 0.65 | -0.74 | 2.05  |                          |
| Clinical condition category 3 <sup>a</sup> | Neuropathic              | 12               | 1.80 | 0.20  | 3.39 | 0.37                | 11             | 2.03  | 0.35  | 3.71          | 0.46                     | 10             | 5.07 | 1.54  | 8.60  | 0.58                     |
|                                            | Non-neuropathic          | 17               | 3.74 | 0.95  | 6.53 |                     | 17             | 1.43  | -0.06 | 2.92          |                          | 19             | 3.96 | 2.06  | 5.86  |                          |
| Randomization                              | Adequate randomization   | 18               | 2.20 | -0.12 | 4.52 | 0.52                | 20             | 0.68  | -0.43 | 1.79          | 0.09                     | 17             | 4.65 | 2.91  | 6.39  | 0.71                     |
|                                            | Inadequate randomization | 14               | 3.61 | 0.41  | 6.82 |                     | 9              | 3.26  | 0.96  | 5.56          |                          | 14             | 4.56 | 1.62  | 7.49  |                          |
| Allocation concealment                     | Adequate concealment     | 18               | 2.57 | 0.26  | 4.88 | 0.86                | 19             | 0.95  | -0.22 | 2.12          | 0.26                     | 22             | 4.12 | 2.16  | 6.09  | 0.38                     |
|                                            | Inadequate concealment   | 14               | 3.04 | -0.27 | 6.35 |                     | 10             | 2.80  | 0.31  | 5.29          |                          | 9              | 5.82 | 2.56  | 9.07  |                          |
|                                            | Yes                      | 32               |      |       |      | NA                  | 29             |       |       |               | NA                       | 31             |      |       |       | NA                       |

**eTable 15b: Subgroup analyses for role and social functioning, and sleep quality for randomized clinical trials of opioids vs. placebo**

| Subgroup factors                  | Role functioning  |     |       |       |                     | Social functioning       |     |       |       | Sleep quality       |                |      |       |       |                     |                   |
|-----------------------------------|-------------------|-----|-------|-------|---------------------|--------------------------|-----|-------|-------|---------------------|----------------|------|-------|-------|---------------------|-------------------|
|                                   | No. of studies    | WMD | 95%CI |       | Inter-action test p | No. of studies           | WMD | 95%CI |       | Inter-action test p | No. of studies | WMD  | 95%CI |       | Inter-action test p |                   |
| Blinding of patients              | No                | 0   |       |       |                     | 0                        |     |       |       |                     | 0              |      |       |       |                     |                   |
| Blinding of health care providers | Yes               | 31  |       |       |                     | 29                       |     |       |       | NA                  | 31             |      |       |       | NA                  |                   |
|                                   | No                | 1   |       |       |                     | 0                        |     |       |       |                     | 0              |      |       |       |                     |                   |
| Blinding of data collectors       | Yes               | 31  |       |       |                     | 29                       |     |       |       | NA                  | 30             |      |       |       | NA                  |                   |
|                                   | No                | 1   |       |       |                     | 0                        |     |       |       |                     | 1              |      |       |       |                     |                   |
| Blinding of outcome assessors     | Yes               | 30  | 2.77  | 0.83  | 4.71                | 0.81                     | 28  |       |       | NA                  | 29             | 4.43 | 2.69  | 6.16  | 0.48                |                   |
|                                   | No                | 2   | 5.02  | -6.34 | 16.37               |                          | 1   |       |       |                     |                | 2    | 6.81  | 2.13  |                     | 11.50             |
| Blinding of data analyst          | Yes               | 1   |       |       |                     | NA                       | 1   |       |       | NA                  | 2              | 2.25 | -0.76 | 5.26  | 0.43                |                   |
|                                   | No                | 31  |       |       |                     |                          | 28  |       |       |                     |                | 29   | 4.84  | 3.00  |                     | 6.69              |
| Trial design                      | Parallel trials   | 22  | 3.15  | 1.05  | 5.25                | 0.45                     | 20  | 1.79  | 0.43  | 3.15                | 0.70           | 24   | 4.60  | 2.79  | 6.41                | 0.98              |
|                                   | Cross-over trials | 10  | 0.79  | -2.78 | 4.35                |                          | 9   | 1.19  | -1.98 | 4.36                |                | 7    | 4.41  | -0.32 | 9.13                |                   |
| Enrichment trial                  | Yes               | 8   | 1.12  | -0.15 | 2.40                | 0.39                     | 6   | 1.52  | 0.21  | 2.82                | 1.00           | 7    | 1.58  | -0.31 | 3.47                | 0.54 <sup>b</sup> |
|                                   | No                | 24  | 3.44  | 0.66  | 6.22                |                          | 23  | 1.76  | 0.11  | 3.40                |                | 24   | 5.60  | 3.72  | 7.49                |                   |
| Type of opioid intervention       | Opioids alone     | 25  | 1.33  | -0.29 | 2.95                | <b>0.002<sup>d</sup></b> | 23  | 1.14  | -0.14 | 2.42                | 0.11           | 29   | 4.03  | 2.46  | 5.61                | 0.06 <sup>b</sup> |
|                                   | Combination       | 7   | 8.35  | 4.27  | 12.43               |                          | 6   | 3.65  | 1.20  | 6.09                |                | 2    | 16.14 | 1.57  | 30.72               |                   |

WMD: Weighted mean difference; RR: relative risk; 95%CI: 95% confidence interval; NA: not applicable as no subgroup analysis was conducted for less than 2 studies in a given subgroup.

<sup>a</sup> We excluded one to four trials with mixed clinical conditions from subgroup analysis for different clinical conditions.

<sup>b</sup> p-value from multivariable meta-regression.

<sup>c</sup> Although there is significant subgroup effect based on clinical condition and social functioning, this finding had low credibility as only 3 of 11 criteria for establishing trustworthiness of subgroup effects (eTable2) are met: (1) characteristic measured at baseline, (2) hypothesis specified a priori, and (3) p-value 0.01 for interaction test suggests a low likelihood that chance explains effect

<sup>d</sup> Although there is significant subgroup effect based on combination products vs. opioids alone and role functioning, this finding had low credibility as only 2 of 11 criteria for establishing trustworthiness of subgroup effects (eTable 2) are met: (1) characteristic measured at baseline, and (2) p-value 0.002 for interaction test suggests a low likelihood that chance explains effect. Significant subgroup effects are **bolded**.

**eTable 15c: Subgroup analyses for vomiting, nausea and constipation for randomized clinical trials of opioids vs. placebo**

| Subgroup factors                           |                          | Vomiting    |      |       |      | Nausea              |             |      |       | Constipation |                     |             |      |       |      |                     |
|--------------------------------------------|--------------------------|-------------|------|-------|------|---------------------|-------------|------|-------|--------------|---------------------|-------------|------|-------|------|---------------------|
|                                            |                          | No. studies | RR   | 95%CI |      | Inter-action test p | No. studies | RR   | 95%CI |              | Inter-action test p | No. studies | RR   | 95%CI |      | Inter-action test p |
| Length of follow-up                        | < 3 months               | 17          | 4.37 | 2.92  | 6.52 | 0.22                | 24          | 2.56 | 2.02  | 3.24         | 0.44                | 24          | 3.44 | 2.54  | 4.66 | 0.72                |
|                                            | ≥ 3 months               | 34          | 3.26 | 2.69  | 3.96 |                     | 39          | 2.28 | 1.94  | 2.69         |                     | 39          | 3.30 | 2.86  | 3.81 |                     |
| Clinical condition category 1 <sup>a</sup> | Objective                | 30          | 3.87 | 3.14  | 4.78 | 0.12                | 39          | 2.64 | 2.27  | 3.08         | 0.27 <sup>b</sup>   | 39          | 3.65 | 3.04  | 4.39 | 0.14                |
|                                            | Subjective               | 17          | 3.01 | 2.03  | 4.47 |                     | 20          | 1.95 | 1.52  | 2.49         |                     | 20          | 2.85 | 2.28  | 3.56 |                     |
| Clinical condition category 2 <sup>a</sup> | Neuropathic              | 13          | 3.08 | 2.05  | 4.63 | 0.06                | 17          | 2.33 | 1.89  | 2.86         | 0.21 <sup>b</sup>   | 16          | 3.59 | 2.50  | 5.17 | 0.12                |
|                                            | Nociceptive              | 17          | 4.25 | 3.32  | 5.45 |                     | 22          | 2.75 | 2.26  | 3.35         |                     | 23          | 3.73 | 3.01  | 4.62 |                     |
|                                            | Central sensitization    | 17          | 3.01 | 2.03  | 4.47 |                     | 20          | 1.95 | 1.52  | 2.49         |                     | 20          | 2.85 | 2.28  | 3.56 |                     |
| Clinical condition category 3 <sup>a</sup> | Neuropathic              | 13          | 3.08 | 2.05  | 4.63 | 0.56                | 17          | 2.33 | 1.89  | 2.86         | 0.84                | 16          | 3.59 | 2.50  | 5.17 | 0.97                |
|                                            | Non-neuropathic          | 34          | 3.62 | 2.89  | 4.53 |                     | 42          | 2.36 | 2.01  | 2.77         |                     | 43          | 3.33 | 2.85  | 3.89 |                     |
| Randomization                              | Adequate randomization   | 26          | 3.73 | 2.86  | 4.86 | 0.36                | 35          | 2.80 | 2.41  | 3.25         | <b>0.003</b>        | 33          | 3.26 | 2.78  | 3.81 | 0.70                |
|                                            | Inadequate randomization | 25          | 3.11 | 2.41  | 4.02 |                     | 28          | 1.88 | 1.53  | 2.30         |                     | 30          | 3.25 | 2.49  | 4.24 |                     |
| Allocation concealment                     | Adequate concealment     | 29          | 3.49 | 2.71  | 4.49 | 0.91                | 35          | 2.56 | 2.13  | 3.07         | 0.18                | 34          | 3.29 | 2.73  | 3.96 | 0.79                |
|                                            | Inadequate concealment   | 22          | 3.37 | 2.55  | 4.44 |                     | 28          | 2.11 | 1.76  | 2.51         |                     | 29          | 3.20 | 2.53  | 4.06 |                     |
| Blinding of patients                       | Yes                      | 51          |      |       |      | NA                  | 63          |      |       |              | NA                  | 63          |      |       |      | NA                  |
|                                            | No                       | 0           |      |       |      |                     | 0           |      |       |              |                     | 0           |      |       |      |                     |
|                                            | Yes                      | 51          |      |       |      | NA                  | 63          |      |       |              | NA                  | 63          |      |       |      | NA                  |

**eTable 15c: Subgroup analyses for vomiting, nausea and constipation for randomized clinical trials of opioids vs. placebo**

| Subgroup factors                  |                   | Vomiting    |      |       |       | Nausea              |             |      |       | Constipation |                     |             |      |       |      |                     |
|-----------------------------------|-------------------|-------------|------|-------|-------|---------------------|-------------|------|-------|--------------|---------------------|-------------|------|-------|------|---------------------|
|                                   |                   | No. studies | RR   | 95%CI |       | Inter-action test p | No. studies | RR   | 95%CI |              | Inter-action test p | No. studies | RR   | 95%CI |      | Inter-action test p |
| Blinding of health care providers | No                | 0           |      |       |       |                     | 0           |      |       |              |                     | 0           |      |       |      |                     |
|                                   | Yes               | 50          |      |       |       | NA                  | 62          |      |       |              | NA                  | 62          |      |       |      | NA                  |
| Blinding of data collectors       | No                | 1           |      |       |       |                     | 1           |      |       |              |                     | 1           |      |       |      |                     |
|                                   | Yes               | 48          | 3.41 | 2.83  | 4.10  | 0.70                | 60          | 2.33 | 2.03  | 2.68         | 0.30                | 60          | 3.24 | 2.78  | 3.76 | 0.75                |
| No                                | 3                 | 3.97        | 2.15 | 7.30  | 3     |                     | 3.36        | 2.46 | 4.57  | 3            |                     | 3.52        | 1.45 | 8.59  |      |                     |
| Blinding of outcome assessors     | Yes               | 3           | 2.77 | 1.32  | 5.81  | 0.60                | 4           | 2.01 | 1.15  | 3.51         | 0.49                | 3           | 3.93 | 1.90  | 8.10 | 0.57                |
|                                   | No                | 48          | 3.48 | 2.90  | 4.19  |                     | 59          | 2.40 | 2.09  | 2.76         |                     | 60          | 3.23 | 2.78  | 3.74 |                     |
| Trial design                      | Parallel trials   | 43          | 3.48 | 2.90  | 4.18  | 0.70                | 52          | 2.40 | 2.07  | 2.79         | 0.62                | 51          | 3.18 | 2.73  | 3.69 | 0.57                |
|                                   | Cross-over trials | 8           | 3.08 | 1.64  | 5.77  |                     | 11          | 2.10 | 1.67  | 2.65         |                     | 12          | 4.04 | 2.51  | 6.53 |                     |
| Enrichment trial                  | Yes               | 18          | 2.50 | 1.89  | 3.30  | <b>0.007</b>        | 21          | 1.67 | 1.41  | 1.99         | <b>&lt;0.001</b>    | 20          | 2.52 | 1.98  | 3.20 | 0.05                |
|                                   | No                | 33          | 4.12 | 3.34  | 5.07  |                     | 42          | 2.85 | 2.45  | 3.31         |                     | 43          | 3.55 | 2.99  | 4.22 |                     |
| Type of opioid intervention       | Opioids alone     | 48          | 3.39 | 2.82  | 4.08  | 0.43                | 55          | 2.35 | 2.05  | 2.69         | 0.15                | 56          | 3.37 | 2.91  | 3.90 | 0.66                |
|                                   | Combination       | 2           | 5.17 | 1.92  | 13.96 |                     | 7           | 3.08 | 2.29  | 4.15         |                     | 6           | 2.98 | 2.05  | 4.34 |                     |

RR: relative risk; 95%CI: 95% confidence interval; NA: not applicable as no subgroup analysis was conducted for less than 2 studies in a given subgroup.

<sup>a</sup> We excluded four trials with mixed clinical conditions from subgroup analysis for different clinical conditions.

<sup>b</sup> p-value from multivariable meta-regression.

Significant subgroup effects are **bolded**.

**eTable 15d: Subgroup analyses for dizziness, drowsiness, and headache for randomized clinical trials of opioids vs. placebo**

| Subgroup factors                           |                          | Dizziness   |      |       |      | Drowsiness          |             |      |       | Headache |                     |             |      |       |      |                     |
|--------------------------------------------|--------------------------|-------------|------|-------|------|---------------------|-------------|------|-------|----------|---------------------|-------------|------|-------|------|---------------------|
|                                            |                          | No. studies | RR   | 95%CI |      | Inter-action test p | No. studies | RR   | 95%CI |          | Inter-action test p | No. studies | RR   | 95%CI |      | Inter-action test p |
| Length of follow-up                        | < 3 months               | 25          | 2.57 | 1.91  | 3.45 | 0.98                | 19          | 3.02 | 2.17  | 4.20     | 0.65                | 19          | 1.14 | 0.91  | 1.42 | 0.64                |
|                                            | ≥ 3 months               | 35          | 2.51 | 2.20  | 2.86 |                     | 35          | 3.27 | 2.56  | 4.17     |                     | 33          | 1.07 | 0.95  | 1.21 |                     |
| Clinical condition category 1 <sup>a</sup> | Objective                | 38          | 2.47 | 2.10  | 2.91 | 0.79                | 34          | 3.15 | 2.47  | 4.03     | 0.87                | 30          | 1.02 | 0.90  | 1.16 | 0.13                |
|                                            | Subjective               | 19          | 2.37 | 1.79  | 3.14 |                     | 16          | 3.13 | 2.13  | 4.59     |                     | 19          | 1.20 | 1.00  | 1.44 |                     |
| Clinical condition category 2 <sup>a</sup> | Neuropathic              | 16          | 2.16 | 1.61  | 2.90 | 0.58                | 12          | 2.78 | 1.75  | 4.41     | 0.65                | 13          | 0.94 | 0.70  | 1.27 | 0.19                |
|                                            | Nociceptive              | 22          | 2.62 | 2.17  | 3.15 |                     | 22          | 3.37 | 2.53  | 4.50     |                     | 17          | 1.05 | 0.91  | 1.21 |                     |
|                                            | Central sensitization    | 19          | 2.37 | 1.79  | 3.14 |                     | 16          | 3.13 | 2.13  | 4.59     |                     | 19          | 1.20 | 1.00  | 1.44 |                     |
| Clinical condition category 3 <sup>a</sup> | Neuropathic              | 16          | 2.16 | 1.61  | 2.90 | 0.38                | 12          | 2.78 | 1.75  | 4.41     | 0.41                | 13          | 1.11 | 0.99  | 1.25 | 0.29                |
|                                            | Non-neuropathic          | 41          | 2.52 | 2.16  | 2.95 |                     | 38          | 3.25 | 2.58  | 4.09     |                     | 36          | 0.94 | 0.70  | 1.27 |                     |
| Randomization                              | Adequate randomization   | 34          | 2.63 | 2.23  | 3.09 | 0.14                | 28          | 3.54 | 2.63  | 4.76     | 0.30                | 32          | 1.15 | 1.00  | 1.32 | 0.16                |
|                                            | Inadequate randomization | 26          | 2.11 | 1.65  | 2.70 |                     | 26          | 2.71 | 2.12  | 3.47     |                     | 20          | 0.97 | 0.79  | 1.18 |                     |
| Allocation concealment                     | Adequate concealment     | 35          | 2.56 | 2.13  | 3.07 | 0.37                | 28          | 3.50 | 2.63  | 4.65     | 0.30                | 31          | 1.14 | 0.99  | 1.30 | 0.27                |
|                                            | Inadequate concealment   | 25          | 2.13 | 1.78  | 2.54 |                     | 26          | 2.71 | 2.08  | 3.52     |                     | 21          | 0.99 | 0.82  | 1.21 |                     |
| Blinding of patients                       | Yes                      | 60          |      |       |      | NA                  | 54          |      |       |          | NA                  | 52          |      |       |      | NA                  |
|                                            | No                       | 0           |      |       |      |                     | 0           |      |       |          |                     | 0           |      |       |      |                     |
| Blinding of health care providers          | Yes                      | 60          |      |       |      | NA                  | 54          |      |       |          | NA                  | 52          |      |       |      | NA                  |
|                                            | No                       | 0           |      |       |      |                     | 0           |      |       |          |                     | 0           |      |       |      |                     |

**eTable 15d: Subgroup analyses for dizziness, drowsiness, and headache for randomized clinical trials of opioids vs. placebo**

| Subgroup factors              |                   | Dizziness   |      |       |      | Drowsiness          |             |      |       | Headache |                          |             |      |       |      |                     |
|-------------------------------|-------------------|-------------|------|-------|------|---------------------|-------------|------|-------|----------|--------------------------|-------------|------|-------|------|---------------------|
|                               |                   | No. studies | RR   | 95%CI |      | Inter-action test p | No. studies | RR   | 95%CI |          | Inter-action test p      | No. studies | RR   | 95%CI |      | Inter-action test p |
| Blinding of data collectors   | Yes               | 59          |      |       |      | NA                  | 53          |      |       |          | NA                       | 51          |      |       |      | NA                  |
|                               | No                | 1           |      |       |      |                     | 1           |      |       |          |                          | 1           |      |       |      |                     |
| Blinding of outcome assessors | Yes               | 57          | 2.46 | 2.13  | 2.84 | 0.89                | 51          | 3.19 | 2.58  | 3.93     | 0.82                     | 50          | 1.10 | 0.99  | 1.22 | <b>0.04</b>         |
|                               | No                | 3           | 2.22 | 1.42  | 3.49 |                     | 3           | 3.12 | 1.90  | 5.13     |                          | 2           | 0.25 | 0.06  | 0.99 |                     |
| Blinding of data analyst      | Yes               | 4           | 1.97 | 1.08  | 3.60 | 0.45                | 2           | 0.95 | 0.49  | 1.85     | <b>0.01</b> <sup>b</sup> | 4           | 1.17 | 0.69  | 2.01 | 0.79                |
|                               | No                | 56          | 2.49 | 2.16  | 2.87 |                     | 52          | 3.29 | 2.72  | 4.00     |                          | 48          | 1.09 | 0.97  | 1.21 |                     |
| Trial design                  | Parallel trials   | 49          | 2.44 | 2.12  | 2.81 | 0.83                | 48          | 3.31 | 2.66  | 4.11     | 0.28                     | 43          | 1.08 | 0.96  | 1.21 | 0.43                |
|                               | Cross-over trials | 11          | 2.54 | 1.47  | 4.37 |                     | 6           | 2.33 | 1.49  | 3.64     |                          | 9           | 1.31 | 0.83  | 2.06 |                     |
| Enrichment trial              | Yes               | 19          | 1.86 | 1.45  | 2.39 | <b>0.01</b>         | 17          | 1.82 | 1.35  | 2.45     | <b>0.01</b>              | 19          | 0.97 | 0.77  | 1.22 | 0.28                |
|                               | No                | 41          | 2.69 | 2.33  | 3.11 |                     | 37          | 3.59 | 2.88  | 4.47     |                          | 33          | 1.13 | 0.99  | 1.28 |                     |
| Type of opioid intervention   | Opioids alone     | 52          | 2.50 | 2.17  | 2.87 | 0.58                | 47          | 3.13 | 2.55  | 3.86     | 0.95                     | 47          | 1.06 | 0.94  | 1.18 | 0.13                |
|                               | Combination       | 7           | 2.79 | 1.97  | 3.95 |                     | 6           | 4.32 | 1.89  | 9.85     |                          | 5           | 1.33 | 1.02  | 1.75 |                     |

RR: relative risk; 95%CI: 95% confidence interval; NA: not applicable as no subgroup analysis was conducted for less than 2 studies in a given subgroup.

<sup>a</sup> We excluded one to four trials with mixed clinical conditions from subgroup analysis for different clinical conditions.

<sup>b</sup> Although there is a significant subgroup effect based on blinding of data analysts and drowsiness, this finding had low credibility as only 4 of 11 criteria for establishing trustworthiness of subgroup effects (eTable 2) are met: (1) characteristic measured at baseline, (2) hypothesis specified a priori, (3) direction of effect specified a priori, and (4) p-value 0.01 for interaction test suggest a low likelihood that chance explains effect

Significant subgroup effects are **bolded**.

**eTable 15e: Subgroup analyses for pruritus and dry mouth for randomized clinical trials of opioids vs. placebo**

| Subgroup factors                           |                          | Pruritus    |      |       |      | Dry mouth           |             |      |       |      |                     |
|--------------------------------------------|--------------------------|-------------|------|-------|------|---------------------|-------------|------|-------|------|---------------------|
|                                            |                          | No. studies | RR   | 95%CI |      | Inter-action test p | No. studies | RR   | 95%CI |      | Inter-action test p |
| Length of follow-up                        | < 3 months               | 13          | 1.78 | 1.21  | 2.62 | 0.24                | 17          | 1.98 | 1.35  | 2.93 | 0.10                |
|                                            | ≥ 3 months               | 22          | 3.14 | 1.95  | 5.05 |                     | 17          | 2.69 | 1.99  | 3.64 |                     |
| Clinical condition category 1 <sup>a</sup> | Objective                | 23          | 3.15 | 2.02  | 4.90 | 0.34                | 22          | 2.30 | 1.69  | 3.14 | 0.88                |
|                                            | Subjective               | 11          | 2.15 | 1.16  | 3.96 |                     | 11          | 2.20 | 1.29  | 3.75 |                     |
| Clinical condition category 2 <sup>a</sup> | Neuropathic              | 6           | 2.91 | 1.56  | 5.42 | 0.36                | 9           | 1.79 | 1.09  | 2.94 | 0.55                |
|                                            | Nociceptive              | 17          | 3.21 | 1.90  | 5.44 |                     | 13          | 2.70 | 1.82  | 4.01 |                     |
|                                            | Central sensitization    | 11          | 2.15 | 1.16  | 3.96 |                     | 11          | 2.20 | 1.29  | 3.75 |                     |
| Clinical condition category 3 <sup>a</sup> | Neuropathic              | 6           | 2.91 | 1.56  | 5.42 | 0.75                | 9           | 1.79 | 1.09  | 2.94 | 0.24                |
|                                            | Non-neuropathic          | 28          | 2.71 | 1.84  | 4.00 |                     | 24          | 2.50 | 1.84  | 3.40 |                     |
| Randomization                              | Adequate randomization   | 19          | 3.04 | 1.94  | 4.75 | 0.30                | 19          | 2.53 | 1.71  | 3.73 | 0.49                |
|                                            | Inadequate randomization | 16          | 1.97 | 1.22  | 3.20 |                     | 15          | 1.86 | 1.36  | 2.54 |                     |
| Allocation concealment                     | Adequate concealment     | 20          | 2.94 | 1.92  | 4.52 | 0.37                | 21          | 2.63 | 1.90  | 3.64 | 0.11                |
|                                            | Inadequate concealment   | 15          | 2.06 | 1.26  | 3.38 |                     | 13          | 1.61 | 1.11  | 2.35 |                     |
| Blinding of patients                       | Yes                      | 35          |      |       |      | NA                  | 34          |      |       |      | NA                  |
|                                            | No                       | 0           |      |       |      |                     | 0           |      |       |      |                     |
| Blinding of health care providers          | Yes                      | 35          |      |       |      | NA                  | 34          |      |       |      | NA                  |
|                                            | No                       | 0           |      |       |      |                     | 0           |      |       |      |                     |
|                                            | Yes                      | 34          |      |       |      | NA                  | 33          |      |       |      | NA                  |



**eTable 15e: Subgroup analyses for pruritus and dry mouth for randomized clinical trials of opioids vs. placebo**

| Subgroup factors                             |                          | Pruritus        |      |       |      | Dry mouth           |             |      |       |      |                          |
|----------------------------------------------|--------------------------|-----------------|------|-------|------|---------------------|-------------|------|-------|------|--------------------------|
|                                              |                          | No. studies     | RR   | 95%CI |      | Inter-action test p | No. studies | RR   | 95%CI |      | Inter-action test p      |
| Blinding of data collectors                  | No                       | 1               |      |       |      |                     | 1           |      |       |      |                          |
|                                              | Yes                      | 32              | 2.57 | 1.81  | 3.64 | 0.85                | 32          | 2.31 | 1.78  | 3.01 | 0.27                     |
| Blinding of outcome assessors                | No                       | 3               | 3.60 | 1.86  | 6.97 |                     | 2           | 1.00 | 0.26  | 3.82 |                          |
|                                              | Blinding of data analyst | Yes             | 1    |       |      |                     | NA          | 3    | 1.25  | 0.49 | 3.18                     |
| No                                           |                          | 34              |      |       |      | 31                  |             | 2.34 | 1.79  | 3.07 |                          |
| Trial design                                 | Parallel trials          | 28              | 2.94 | 1.97  | 4.39 | 0.24                | 25          | 2.59 | 1.96  | 3.41 | 0.89                     |
|                                              | Cross-over trials        | 7               | 1.30 | 0.91  | 1.87 |                     | 9           | 1.47 | 0.92  | 2.34 |                          |
| Enrichment trial                             | Yes                      | 9               | 1.01 | 0.61  | 1.67 | 0.07                | 6           | 1.43 | 0.57  | 3.57 | 0.36                     |
|                                              | No                       | 26              | 3.04 | 2.08  | 4.45 |                     | 28          | 2.34 | 1.78  | 3.09 |                          |
| Type of opioid intervention                  | Opioids alone            | 32              | 2.65 | 1.83  | 3.83 | 0.89                | 31          | 2.19 | 1.68  | 2.85 | 0.79                     |
|                                              | Combination              | 3               | 2.35 | 1.02  | 5.41 |                     | 3           | 3.08 | 0.99  | 9.57 |                          |
| Proportion of loss to follow-up <sup>b</sup> | < 20%                    | NA <sup>b</sup> |      |       |      | NA <sup>b</sup>     | 4           | 1.09 | 0.69  | 1.74 | <b>0.008<sup>b</sup></b> |
|                                              | ≥ 20%                    | NA <sup>b</sup> |      |       |      |                     | 30          | 2.57 | 1.98  | 3.34 |                          |

RR: relative risk; 95%CI: 95% confidence interval; NA: not applicable as no subgroup analysis was conducted for less than 2 studies in a given subgroup.

<sup>a</sup> We excluded one trial with mixed clinical conditions from subgroup analysis for different clinical conditions.

<sup>b</sup> subgroup analysis for loss to follow-up was only performed for the outcome dry month, as meta-regression of loss to follow-up and incidence of dry mouth was significant

Significant subgroup effects are **bolded**.

**eTable 16a: Subgroup analyses for pain, physical functioning and vomiting for randomized clinical trials of opioids vs. NSAIDs**

| Subgroup factors                             |                          | Pain        |       |       |       | Physical functioning |             |       |       | Vomiting |                     |                 |      |       |      |                     |
|----------------------------------------------|--------------------------|-------------|-------|-------|-------|----------------------|-------------|-------|-------|----------|---------------------|-----------------|------|-------|------|---------------------|
|                                              |                          | No. studies | WMD   | 95%CI |       | Inter-action test p  | No. studies | WMD   | 95%CI |          | Inter-action test p | No. studies     | RR   | 95%CI |      | Inter-action test p |
| Treatment effect                             | Change score reported    | 3           | 0.38  | -0.16 | 0.93  | 0.08                 | 4           | -1.45 | -2.92 | 0.02     | 0.29                | NA <sup>a</sup> |      |       |      | NA <sup>a</sup>     |
|                                              | Change score converted   | 6           | -1.07 | -2.08 | -0.05 |                      | 3           | 2.52  | -3.36 | 8.41     |                     | NA <sup>a</sup> |      |       |      |                     |
| Length of follow-up                          | < 3 months               | 6           | -0.68 | -1.85 | 0.49  | 0.77                 | 5           | 0.41  | -1.96 | 2.78     | 0.13                | 4               |      |       |      | NA                  |
|                                              | ≥ 3 months               | 3           | -0.43 | -1.86 | 1.01  |                      | 2           | -2.06 | -3.41 | -0.70    |                     | 1               |      |       |      |                     |
| Clinical condition category 1 <sup>b</sup>   | Objective                | 2           | -0.35 | -1.62 | 0.93  | 0.50                 | 5           |       |       |          | NA                  | 3               | 4.06 | 1.79  | 9.24 | 0.69                |
|                                              | Subjective               | 6           | -1.04 | -1.55 | -0.52 |                      | 1           |       |       |          |                     | 2               | 5.08 | 2.83  | 9.15 |                     |
| Clinical condition category 2 <sup>b,c</sup> | Neuropathic              | 1           |       |       |       | 0.21                 | 0           |       |       |          | NA                  | 0               |      |       |      | 0.69                |
|                                              | Nociceptive              | 5           | 0.12  | -0.56 | 0.80  |                      | 1           |       |       |          |                     | 3               | 4.06 | 1.79  | 9.24 |                     |
|                                              | Central sensitization    | 2           | -1.04 | -1.55 | -0.52 |                      | 5           |       |       |          |                     | 2               | 5.08 | 2.83  | 9.15 |                     |
| Clinical condition category 3 <sup>b</sup>   | Neuropathic              | 1           |       |       |       | NA                   | 0           |       |       |          | NA                  | 0               |      |       |      | NA                  |
|                                              | Non-neuropathic          | 7           |       |       |       |                      | 6           |       |       |          |                     | 5               |      |       |      |                     |
| Randomization                                | Adequate randomization   | 4           | -0.81 | -1.14 | -0.48 | 0.71                 | 3           | 1.62  | -1.46 | 4.70     | 0.08                | 3               | 4.68 | 2.75  | 7.97 | 0.96                |
|                                              | Inadequate randomization | 5           | -0.47 | -2.12 | 1.19  |                      | 4           | -2.03 | -3.31 | -0.74    |                     | 2               | 4.86 | 1.65  | 14.3 |                     |
| Allocation concealment                       | Adequate concealment     | 2           | 0.46  | -0.39 | 1.30  | 0.17                 | 2           | -2.00 | -3.34 | -0.66    | 0.15                | 3               | 4.68 | 2.75  | 7.97 | 0.96                |
|                                              | Inadequate concealment   | 7           | -0.88 | -1.85 | 0.09  |                      | 5           | 0.40  | -2.05 | 2.84     |                     | 2               | 4.86 | 1.65  | 14.3 |                     |
|                                              | Yes                      | 2           | 0.46  | -0.39 | 1.30  |                      | 3           | -0.95 | -3.23 | 1.33     |                     | 4               |      |       |      |                     |

**eTable 16a: Subgroup analyses for pain, physical functioning and vomiting for randomized clinical trials of opioids vs. NSAIDs**

| Subgroup factors                               |                   | Pain        |       |       |      | Physical functioning |             |       |       | Vomiting |                     |             |    |       |  |                     |
|------------------------------------------------|-------------------|-------------|-------|-------|------|----------------------|-------------|-------|-------|----------|---------------------|-------------|----|-------|--|---------------------|
|                                                |                   | No. studies | WMD   | 95%CI |      | Inter-action test p  | No. studies | WMD   | 95%CI |          | Inter-action test p | No. studies | RR | 95%CI |  | Inter-action test p |
| Blinding of patients <sup>d</sup>              | No                | 7           | -0.88 | -1.85 | 0.09 | 0.17                 | 4           | 0.13  | -4.35 | 4.60     | 0.77                | 1           |    |       |  | NA                  |
|                                                | Yes               | 2           | 0.46  | -0.39 | 1.30 | 0.17                 | 3           | -0.95 | -3.23 | 1.33     |                     | 4           |    |       |  |                     |
| Blinding of health care providers <sup>d</sup> | No                | 7           | -0.88 | -1.85 | 0.09 |                      | 0.17        | 4     | 0.13  | -4.35    | 4.60                | 0.77        | 1  |       |  |                     |
|                                                | Yes               | 2           | 0.46  | -0.39 | 1.30 | 3                    |             | -0.95 | -3.23 | 1.33     | 4                   |             |    |       |  |                     |
| Blinding of data collectors <sup>d</sup>       | No                | 7           | -0.88 | -1.85 | 0.09 | 0.17                 | 4           | 0.13  | -4.35 | 4.60     | 0.77                | 1           |    |       |  | NA                  |
|                                                | Yes               | 2           | 0.46  | -0.39 | 1.30 |                      | 3           | -0.95 | -3.23 | 1.33     |                     | 4           |    |       |  |                     |
| Blinding of outcome assessors <sup>d</sup>     | No                | 7           | -0.88 | -1.85 | 0.09 | 0.17                 | 4           | 0.13  | -4.35 | 4.60     | 0.77                | 1           |    |       |  | NA                  |
|                                                | Yes               | 2           | 0.46  | -0.39 | 1.30 |                      | 3           | -0.95 | -3.23 | 1.33     |                     | 4           |    |       |  |                     |
| Blinding of data analyst                       | No                | 9           |       |       |      | NA                   | 7           |       |       |          | NA                  | 5           |    |       |  | NA                  |
|                                                | Yes               | 0           |       |       |      |                      | 0           |       |       |          |                     | 0           |    |       |  |                     |
| Trial design                                   | Parallel trials   | 8           |       |       |      | NA                   | 5           | -0.93 | -3.59 | 1.72     | 0.87                | 4           |    |       |  | NA                  |
|                                                | Cross-over trials | 1           |       |       |      |                      | 2           | -0.22 | -3.43 | 2.99     |                     | 1           |    |       |  |                     |
| Enrichment trial                               | No                | 8           |       |       |      | NA                   | 6           |       |       |          | NA                  | 5           |    |       |  | NA                  |
|                                                | Yes               | 1           |       |       |      |                      | 1           |       |       |          |                     | 0           |    |       |  |                     |

**eTable 16a: Subgroup analyses for pain, physical functioning and vomiting for randomized clinical trials of opioids vs. NSAIDs**

| Subgroup factors            |               | Pain        |       |       |      | Physical functioning |             |       |       | Vomiting |                     |             |    |       |  |                     |
|-----------------------------|---------------|-------------|-------|-------|------|----------------------|-------------|-------|-------|----------|---------------------|-------------|----|-------|--|---------------------|
|                             |               | No. studies | WMD   | 95%CI |      | Inter-action test p  | No. studies | WMD   | 95%CI |          | Inter-action test p | No. studies | RR | 95%CI |  | Inter-action test p |
| Type of opioid intervention | Opioids alone | 5           | -0.21 | -1.02 | 0.59 | 0.31                 | 5           | -1.61 | -2.80 | -0.41    | 0.29                | 5           |    |       |  | NA                  |
|                             | Combination   | 4           | -1.04 | -2.50 | 0.43 |                      | 2           | 3.46  | -5.45 | 12.37    |                     | 0           |    |       |  |                     |

WMD: Weighted mean difference; 95%CI: 95% confidence interval; RR: relative risk; NA: not applicable as no subgroup analysis was conducted for less than 2 studies in a given subgroup.

<sup>a</sup> Subgroup analysis for change score reported vs converted is only applicable for continuous outcomes, not for binary outcomes, e.g. vomiting.

<sup>b</sup> We excluded one trial with mixed clinical conditions from subgroup analysis for different clinical conditions.

<sup>c</sup> This analysis was restricted to the 2 clinical subgroups that provided sufficient trials ( $\geq 2$  trials in each subgroup) for analysis.

<sup>d</sup> Results are the same for subgroup analyses of blinding of patients, health care providers, data collectors or outcome assessors.

**eTable 16b: Subgroup analyses for nausea, constipation and dizziness for randomized clinical trials of opioids vs. NSAIDs**

| Subgroup factors                             |                          | Nausea      |      |       |      | Constipation        |             |      |       | Dizziness |                     |             |      |       |      |                     |
|----------------------------------------------|--------------------------|-------------|------|-------|------|---------------------|-------------|------|-------|-----------|---------------------|-------------|------|-------|------|---------------------|
|                                              |                          | No. studies | RR   | 95%CI |      | Inter-action test p | No. studies | RR   | 95%CI |           | Inter-action test p | No. studies | RR   | 95%CI |      | Inter-action test p |
| Length of follow-up                          | < 3 months               | 6           | 0.10 | 0.05  | 0.15 | 0.83                | 7           | 0.05 | 0.03  | 0.07      | 0.15                | 6           | 0.05 | 0.00  | 0.09 | 0.68                |
|                                              | ≥ 3 months               | 2           | 0.13 | 0.08  | 0.18 |                     | 2           | 0.14 | 0.10  | 0.18      |                     | 2           | 0.08 | 0.03  | 0.14 |                     |
| Clinical condition category 1 <sup>a</sup>   | Objective                | 4           | 2.07 | 1.12  | 3.81 | 0.57                | 5           | 3.07 | 1.28  | 7.33      | 0.80                | 4           | 1.58 | 1.13  | 2.21 | 0.09                |
|                                              | Subjective               | 3           | 2.66 | 2.02  | 3.49 |                     | 3           | 2.73 | 1.44  | 5.18      |                     | 3           | 2.49 | 1.50  | 4.14 |                     |
| Clinical condition category 2 <sup>a,b</sup> | Neuropathic              | 0           |      |       |      | 0.57                | 0           |      |       |           | 0.80                | 0           |      |       |      | 0.09                |
|                                              | Nociceptive              | 4           | 2.07 | 1.12  | 3.81 |                     | 5           | 3.07 | 1.28  | 7.33      |                     | 4           | 1.58 | 1.13  | 2.21 |                     |
|                                              | Central sensitization    | 3           | 2.66 | 2.02  | 3.49 |                     | 3           | 2.73 | 1.44  | 5.18      |                     | 3           | 2.49 | 1.50  | 4.14 |                     |
| Clinical condition category 3 <sup>a</sup>   | Neuropathic              | 0           |      |       |      | NA                  | 0           |      |       |           | NA                  | 0           |      |       |      | NA                  |
|                                              | Non-neuropathic          | 7           |      |       |      |                     | 8           |      |       |           |                     | 7           |      |       |      |                     |
| Randomization                                | Adequate randomization   | 4           | 2.62 | 2.02  | 3.39 | 0.59                | 5           | 2.36 | 1.41  | 3.94      | 0.18                | 4           | 2.07 | 1.25  | 3.41 | 0.40                |
|                                              | Inadequate randomization | 4           | 1.99 | 0.88  | 4.51 |                     | 4           | 5.22 | 2.49  | 10.95     |                     | 4           | 1.67 | 1.14  | 2.44 |                     |
| Allocation concealment                       | Adequate concealment     | 3           | 2.66 | 2.03  | 3.47 | 0.50                | 3           | 2.54 | 1.37  | 4.72      | 0.66                | 3           | 2.30 | 1.51  | 3.49 | 0.19                |
|                                              | Inadequate concealment   | 5           | 2.07 | 1.21  | 3.56 |                     | 6           | 3.27 | 1.62  | 6.58      |                     | 5           | 1.59 | 1.09  | 2.32 |                     |
| Blinding of patients <sup>c</sup>            | Yes                      | 4           | 2.65 | 2.09  | 3.35 | 0.22                | 4           | 3.16 | 1.66  | 6.02      | 0.53                | 4           | 2.11 | 1.53  | 2.93 | 0.21                |
|                                              | No                       | 4           | 1.59 | 0.70  | 3.64 |                     | 5           | 2.12 | 0.96  | 4.68      |                     | 4           | 1.01 | 0.39  | 2.63 |                     |
|                                              | Yes                      | 4           | 2.65 | 2.09  | 3.35 | 0.22                | 4           | 3.16 | 1.66  | 6.02      | 0.53                | 4           | 2.11 | 1.53  | 2.93 | 0.21                |

**eTable 16b: Subgroup analyses for nausea, constipation and dizziness for randomized clinical trials of opioids vs. NSAIDs**

| Subgroup factors                               |                   | Nausea      |      |       |      | Constipation        |             |      |       | Dizziness |                     |             |      |       |      |                     |
|------------------------------------------------|-------------------|-------------|------|-------|------|---------------------|-------------|------|-------|-----------|---------------------|-------------|------|-------|------|---------------------|
|                                                |                   | No. studies | RR   | 95%CI |      | Inter-action test p | No. studies | RR   | 95%CI |           | Inter-action test p | No. studies | RR   | 95%CI |      | Inter-action test p |
| Blinding of health care providers <sup>c</sup> | No                | 4           | 1.59 | 0.70  | 3.64 |                     | 5           | 2.12 | 0.96  | 4.68      |                     | 4           | 1.01 | 0.39  | 2.63 |                     |
|                                                | Yes               | 4           | 2.65 | 2.09  | 3.35 | 0.22                | 4           | 3.16 | 1.66  | 6.02      | 0.53                | 4           | 2.11 | 1.53  | 2.93 | 0.21                |
| Blinding of data collectors <sup>c</sup>       | No                | 4           | 1.59 | 0.70  | 3.64 |                     | 5           | 2.12 | 0.96  | 4.68      |                     | 4           | 1.01 | 0.39  | 2.63 |                     |
| Blinding of outcome assessors <sup>c</sup>     | Yes               | 4           | 2.65 | 2.09  | 3.35 | 0.22                | 4           | 3.16 | 1.66  | 6.02      | 0.53                | 4           | 2.11 | 1.53  | 2.93 | 0.21                |
|                                                | No                | 4           | 1.59 | 0.70  | 3.64 |                     | 5           | 2.12 | 0.96  | 4.68      |                     | 4           | 1.01 | 0.39  | 2.63 |                     |
| Blinding of data analyst                       | Yes               | 0           |      |       |      | NA                  | 0           |      |       |           | NA                  | 0           |      |       |      | NA                  |
|                                                | No                | 8           |      |       |      |                     | 9           |      |       |           |                     | 8           |      |       |      |                     |
| Trial design                                   | Parallel trials   | 7           |      |       |      | NA                  | 8           |      |       |           | NA                  | 7           |      |       |      | NA                  |
|                                                | Cross-over trials | 1           |      |       |      |                     | 1           |      |       |           |                     | 1           |      |       |      |                     |
| Enrichment trial                               | Yes               | 1           |      |       |      | NA                  | 1           |      |       |           | NA                  | 1           |      |       |      | NA                  |
|                                                | No                | 7           |      |       |      |                     | 8           |      |       |           |                     | 7           |      |       |      |                     |
| Type of opioid intervention                    | Opioids alone     | 6           | 2.67 | 2.11  | 3.37 | 0.13                | 6           | 3.17 | 1.87  | 5.37      | 0.40                | 6           | 2.12 | 1.64  | 2.73 | 0.16                |
|                                                | Combination       | 2           | 1.23 | 0.45  | 3.37 |                     | 3           | 1.83 | 0.75  | 4.49      |                     | 2           | 0.79 | 0.25  | 2.45 |                     |

RR: relative risk; 95% confidence interval; NA: not applicable as no subgroup analysis was conducted for less than 2 studies in a given subgroup.

<sup>a</sup> We excluded one trial with mixed clinical conditions from subgroup analysis for different clinical conditions.

<sup>b</sup> This analysis was restricted to the 2 clinical subgroups that provided sufficient trials (≥2 trials in each subgroup) for analysis.

<sup>c</sup> Results are the same for subgroup analyses of blinding of patients, health care providers, data collectors or outcome assessors.

**eTable 16c: Subgroup analyses for drowsiness, headache and pruritus for randomized clinical trials of opioids vs. NSAIDs**

| Subgroup factors                             |                          | Drowsiness     |      |       |       | Headache            |                |      |       | Pruritus |                     |                |      |       |       |                     |
|----------------------------------------------|--------------------------|----------------|------|-------|-------|---------------------|----------------|------|-------|----------|---------------------|----------------|------|-------|-------|---------------------|
|                                              |                          | No. of studies | RR   | 95%CI |       | Inter-action test p | No. of studies | RR   | 95%CI |          | Inter-action test p | No. of studies | RR   | 95%CI |       | Inter-action test p |
| Length of follow-up                          | < 3 months               | 4              | 2.19 | 1.57  | 3.05  | 0.48                | 4              | 1.43 | 0.97  | 2.10     | 0.83                | 2              | 5.67 | 1.98  | 16.26 | 0.45                |
|                                              | ≥ 3 months               | 2              | 5.07 | 0.37  | 69.09 |                     | 2              | 1.45 | 0.91  | 2.30     |                     | 2              | 2.94 | 1.28  | 6.77  |                     |
| Clinical condition category 1 <sup>a</sup>   | Objective                | 2              | 5.55 | 0.56  | 54.80 | 0.50                | 3              | 2.89 | 0.78  | 10.71    | 0.49                | 1              |      |       |       | NA                  |
|                                              | Subjective               | 3              | 2.17 | 1.53  | 3.08  |                     | 2              | 1.30 | 1.01  | 1.68     |                     | 2              |      |       |       |                     |
| Clinical condition category 2 <sup>a,b</sup> | Neuropathic              | 0              |      |       |       | 0.50                | 0              |      |       |          | 0.49                | 0              |      |       |       | NA                  |
|                                              | Nociceptive              | 2              | 5.55 | 0.56  | 54.80 |                     | 3              | 2.89 | 0.78  | 10.71    |                     | 1              |      |       |       |                     |
|                                              | Central sensitization    | 3              | 2.17 | 1.53  | 3.08  |                     | 2              | 1.30 | 1.01  | 1.68     |                     | 2              |      |       |       |                     |
| Clinical condition category 3 <sup>a</sup>   | Neuropathic              | 0              |      |       |       | NA                  | 0              |      |       |          | NA                  | 0              |      |       |       | NA                  |
|                                              | Non-neuropathic          | 5              |      |       |       |                     | 5              |      |       |          |                     | 3              |      |       |       |                     |
| Randomization                                | Adequate randomization   | 4              | 2.19 | 1.57  | 3.05  | 0.48                | 3              | 1.36 | 0.98  | 1.90     | 0.67                | 2              | 5.67 | 1.98  | 16.26 | 0.45                |
|                                              | Inadequate randomization | 2              | 5.07 | 0.37  | 69.09 |                     | 3              | 1.52 | 0.96  | 2.39     |                     | 2              | 2.94 | 1.28  | 6.77  |                     |
| Allocation concealment                       | Adequate concealment     | 3              | 2.39 | 1.67  | 3.42  | 0.66                | 3              | 1.36 | 0.98  | 1.90     | 0.67                | 3              |      |       |       | NA                  |
|                                              | Inadequate concealment   | 3              | 2.88 | 0.56  | 14.84 |                     | 3              | 1.52 | 0.96  | 2.39     |                     | 1              |      |       |       |                     |
| Blinding of patients <sup>c</sup>            | Yes                      | 4              | 2.39 | 1.67  | 3.42  | 0.23                | 4              | 1.36 | 1.08  | 1.70     | 0.53                | 3              |      |       |       | NA                  |
|                                              | No                       | 2              | 2.88 | 0.56  | 14.84 |                     | 2              | 2.42 | 0.47  | 12.34    |                     | 1              |      |       |       |                     |
|                                              | Yes                      | 4              | 2.39 | 1.67  | 3.42  | 0.23                | 4              | 1.36 | 1.08  | 1.70     | 0.53                | 3              |      |       |       | NA                  |

| Subgroup factors                               |                   | Drowsiness     |      |       |       | Headache            |                |      |       | Pruritus |                     |                |    |       |  |                     |
|------------------------------------------------|-------------------|----------------|------|-------|-------|---------------------|----------------|------|-------|----------|---------------------|----------------|----|-------|--|---------------------|
|                                                |                   | No. of studies | RR   | 95%CI |       | Inter-action test p | No. of studies | RR   | 95%CI |          | Inter-action test p | No. of studies | RR | 95%CI |  | Inter-action test p |
| Blinding of health care providers <sup>c</sup> | No                | 2              | 2.88 | 0.56  | 14.84 |                     | 2              | 2.42 | 0.47  | 12.34    |                     | 1              |    |       |  |                     |
|                                                | Yes               | 4              | 2.39 | 1.67  | 3.42  | 0.23                | 4              | 1.36 | 1.08  | 1.70     | 0.53                | 3              |    |       |  | NA                  |
| Blinding of data collectors <sup>c</sup>       | No                | 2              | 2.88 | 0.56  | 14.84 |                     | 2              | 2.42 | 0.47  | 12.34    |                     | 1              |    |       |  |                     |
| Blinding of outcome assessors <sup>c</sup>     | Yes               | 4              | 2.39 | 1.67  | 3.42  | 0.23                | 4              | 1.36 | 1.08  | 1.70     | 0.53                | 3              |    |       |  | NA                  |
|                                                | No                | 2              | 2.88 | 0.56  | 14.84 |                     | 2              | 2.42 | 0.47  | 12.34    |                     | 1              |    |       |  |                     |
| Blinding of data analyst                       | Yes               | 0              |      |       |       | NA                  | 0              |      |       |          | NA                  | 0              |    |       |  | NA                  |
|                                                | No                | 6              |      |       |       |                     | 6              |      |       |          |                     | 4              |    |       |  |                     |
| Trial design                                   | Parallel trials   | 6              |      |       |       | NA                  | 5              |      |       |          | NA                  | 4              |    |       |  | NA                  |
|                                                | Cross-over trials | 0              |      |       |       |                     | 1              |      |       |          |                     | 0              |    |       |  |                     |
| Enrichment trial                               | Yes               | 0              |      |       |       | NA                  | 0              |      |       |          | NA                  | 0              |    |       |  | NA                  |
|                                                | No                | 6              |      |       |       |                     | 6              |      |       |          |                     | 4              |    |       |  |                     |
| Type of opioid intervention                    | Opioids alone     | 5              |      |       |       | NA                  | 6              |      |       |          | NA                  | 4              |    |       |  | NA                  |
|                                                | Combination       | 1              |      |       |       |                     | 0              |      |       |          |                     | 0              |    |       |  |                     |

RR: relative risk; 95% confidence interval; NA: not applicable as no subgroup analysis was conducted for less than 2 studies in a given subgroup.

<sup>a</sup> We excluded one trial with mixed clinical conditions from subgroup analysis for different clinical conditions.

<sup>b</sup> This analysis was restricted to the 2 clinical subgroups that provided sufficient trials ( $\geq 2$  trials in each subgroup) for analysis.

<sup>c</sup> Results are the same for subgroup analyses of blinding of patients, health care providers, data collectors or outcome assessors.



**eTable 17: Meta-regressions of length of follow-up and proportion of loss to follow-up for randomized clinical trials of opioids vs. placebo**

| Outcomes              | Length of follow-up (days) |       |       |        |             | Proportion of loss to follow-up (%) |       |      |              |
|-----------------------|----------------------------|-------|-------|--------|-------------|-------------------------------------|-------|------|--------------|
|                       | No. studies                | Coef. | 95%CI |        | p-value     | Coef.                               | 95%CI |      | p-value      |
| Pain                  | 80                         | 0.005 | 0.002 | 0.01   | <b>0.01</b> | -0.001                              | -0.01 | 0.01 | 0.88         |
| Physical functioning  | 51                         | -0.01 | -0.03 | 0.02   | 0.60        | 0.04                                | -0.01 | 0.09 | 0.09         |
| Emotional functioning | 37                         | -0.01 | -0.04 | 0.02   | 0.64        | 0.03                                | -0.03 | 0.09 | 0.36         |
| Role functioning      | 32                         | -0.02 | -0.09 | 0.05   | 0.61        | 0.05                                | -0.07 | 0.17 | 0.43         |
| Social functioning    | 29                         | -0.04 | -0.09 | 0.001  | 0.06        | 0.05                                | -0.03 | 0.14 | 0.21         |
| Sleep quality         | 31                         | -0.06 | -0.11 | -0.002 | <b>0.03</b> | 0.11                                | -0.01 | 0.23 | 0.07         |
| Vomiting              | 51                         | 1.00  | 0.99  | 1.01   | 0.97        | 1.03                                | 0.98  | 1.08 | 0.28         |
| Nausea                | 63                         | 1.00  | 1.00  | 1.00   | 0.89        | 1.00                                | 0.97  | 1.02 | 0.72         |
| Constipation          | 63                         | 1.00  | 1.00  | 1.01   | 0.45        | 1.00                                | 0.99  | 1.02 | 0.60         |
| Dizziness             | 60                         | 1.00  | 1.00  | 1.01   | 0.62        | 1.00                                | 0.98  | 1.03 | 0.67         |
| Drowsiness            | 54                         | 1.00  | 1.00  | 1.01   | 0.45        | 0.99                                | 0.97  | 1.01 | 0.44         |
| Headache              | 52                         | 1.00  | 1.00  | 1.00   | 0.70        | 1.01                                | 0.99  | 1.03 | 0.35         |
| Pruritus              | 35                         | 1.00  | 0.99  | 1.01   | 0.84        | 0.98                                | 0.92  | 1.04 | 0.48         |
| Dry mouth             | 34                         | 1.00  | 1.00  | 1.01   | 0.26        | 0.98                                | 0.96  | 0.99 | <b>0.005</b> |

Coef.: coefficient

Significant meta-regressions are **bolded**.

**eTable 18: Sensitivity analysis by excluding studies with data imputed for non-significant results**

| Outcomes              | Sensitivity analysis                                      | No. of studies | Sample size | WMD   | 95%CI |       |
|-----------------------|-----------------------------------------------------------|----------------|-------------|-------|-------|-------|
| Pain <sup>a</sup>     | Primary analysis                                          | 42             | 16,617      | -0.69 | -0.82 | -0.56 |
|                       | Analysis excluding imputation for non-significant results | 42             | 16,617      | -0.69 | -0.82 | -0.56 |
| Physical functioning  | Primary analysis                                          | 51             | 15,754      | 2.04  | 1.41  | 2.68  |
|                       | Analysis excluding imputation for non-significant results | 48             | 15,026      | 2.14  | 1.49  | 2.80  |
| Emotional functioning | Primary analysis                                          | 23             | 8,962       | -0.44 | -1.09 | 0.20  |
|                       | Analysis excluding imputation for non-significant results | 17             | 5,885       | -0.55 | -1.38 | 0.29  |
| Role functioning      | Primary analysis                                          | 16             | 5,329       | 0.87  | -0.54 | 2.28  |
|                       | Analysis excluding imputation for non-significant results | 12             | 4,370       | 0.53  | -0.57 | 1.64  |
| Social functioning    | Primary analysis                                          | 29             | 7,623       | 1.58  | 0.45  | 2.70  |
|                       | Analysis excluding imputation for non-significant results | 26             | 6,746       | 1.80  | 0.54  | 3.05  |
| Sleep quality         | Primary analysis                                          | 15             | 6,585       | 3.42  | 1.58  | 5.26  |
|                       | Analysis excluding imputation for non-significant results | 11             | 5,340       | 4.10  | 1.96  | 6.23  |

WMD: Weighted mean difference; 95%CI: 95% confidence interval

<sup>a</sup>. No imputation was needed for pain relief

**eTable 19: Sensitivity analysis by using DerSimonian-Laird method vs. Hartung-Knapp-Sidik-Jonkman method for random effects meta-analysis**

| Outcomes                                             |                                                   | DL method |       |       | HKSJ method |        |       |
|------------------------------------------------------|---------------------------------------------------|-----------|-------|-------|-------------|--------|-------|
|                                                      |                                                   | WMD/RR    | 95%CI |       | WMD/RR      | 95%CI  |       |
| <b>Opioids vs placebo</b>                            |                                                   |           |       |       |             |        |       |
| Pain                                                 |                                                   | -0.69     | -0.82 | -0.56 | -0.69       | -0.84  | -0.54 |
| Physical functioning                                 |                                                   | 2.04      | 1.41  | 2.68  | 2.04        | 1.32   | 2.86  |
| Emotional functioning                                |                                                   | -0.44     | -1.09 | 0.20  | -0.44       | -1.16  | 0.28  |
| Role functioning                                     |                                                   | 0.87      | -0.54 | 2.28  | 0.87        | -0.56  | 2.26  |
| Social functioning                                   |                                                   | 1.58      | 0.45  | 2.70  | 1.58        | 0.38   | 2.97  |
| Sleep quality                                        |                                                   | 3.42      | 1.58  | 5.26  | 3.42        | 1.43   | 5.36  |
| Vomiting                                             | Enrichment trials                                 | 2.50      | 1.89  | 3.30  | 2.50        | 1.85   | 3.37  |
|                                                      | Non-enrichment trials                             | 4.12      | 3.34  | 5.07  | 4.12        | 3.32   | 5.11  |
| Nausea                                               | Enrichment trials with randomization reported     | 2.04      | 1.62  | 2.57  | 2.04        | 1.55   | 2.68  |
|                                                      | Non-enrichment trials with randomization reported | 3.17      | 2.69  | 3.73  | 3.17        | 2.67   | 3.76  |
| Constipation                                         |                                                   | 3.08      | 2.65  | 3.55  | 3.08        | 2.67   | 3.55  |
| Dizziness                                            | Enrichment trials                                 | 1.67      | 1.34  | 2.10  | 1.67        | 1.41   | 2.47  |
|                                                      | Non-enrichment trials                             | 2.63      | 2.21  | 3.13  | 2.63        | 2.32   | 3.12  |
| Drowsiness                                           | Enrichment trials                                 | 1.82      | 1.35  | 2.45  | 1.82        | 1.28   | 2.79  |
|                                                      | Non-enrichment trials                             | 3.59      | 2.88  | 4.47  | 3.59        | 2.86   | 4.48  |
| Headache among trials that blinded outcome assessors |                                                   | 1.10      | 0.99  | 1.22  | 1.10        | 0.99   | 1.22  |
| Pruritus                                             |                                                   | 2.59      | 1.86  | 3.62  | 2.59        | 1.83   | 3.71  |
| Dry mouth for trials with loss to follow-up<20%      |                                                   | 2.57      | 1.98  | 3.34  | 2.57        | 1.96   | 3.41  |
| <b>Opioids vs NSAIDs</b>                             |                                                   |           |       |       |             |        |       |
| Pain                                                 |                                                   | -0.60     | -1.54 | 0.34  | -0.60       | -1.47  | 0.28  |
| Physical functioning                                 |                                                   | -0.90     | -2.69 | 0.89  | -0.90       | -3.23  | 1.73  |
| Emotional functioning <sup>a</sup>                   |                                                   | -0.27     | -1.62 | 1.08  | -0.27       | -61.06 | 67.39 |
| Sleep quality <sup>a</sup>                           |                                                   | -3.06     | -7.50 | 1.37  | -3.06       | -31.83 | 25.70 |

**eTable 19: Sensitivity analysis by using DerSimonian-Laird method vs. Hartung-Knapp-Sidik-Jonkman method for random effects meta-analysis**

| Outcomes                           |  | DL method |        |        | HKSJ method  |                |                  |
|------------------------------------|--|-----------|--------|--------|--------------|----------------|------------------|
|                                    |  | WMD/RR    | 95%CI  |        | WMD/RR       | 95%CI          |                  |
| Vomiting                           |  | 4.71      | 2.92   | 7.60   | 4.71         | 2.40           | 9.27             |
| Nausea                             |  | 2.51      | 2.00   | 3.15   | 2.51         | 1.92           | 3.30             |
| Constipation                       |  | 2.84      | 1.82   | 4.43   | 2.84         | 1.62           | 4.95             |
| Dizziness                          |  | 1.98      | 1.47   | 2.66   | 1.98         | 1.35           | 2.86             |
| Drowsiness                         |  | 2.29      | 1.52   | 3.46   | 2.29         | 1.44           | 3.62             |
| Headache                           |  | 1.38      | 1.10   | 1.72   | 1.38         | 1.03           | 1.84             |
| Pruritus                           |  | 4.01      | 2.33   | 6.89   | 4.01         | 1.66           | 9.66             |
| Dry Mouth                          |  | 3.42      | 1.73   | 6.77   | <b>3.42</b>  | <b>0.79</b>    | <b>14.83</b>     |
| <b>Opioids vs anticonvulsants</b>  |  |           |        |        |              |                |                  |
| Pain                               |  | -0.90     | -1.65  | -0.14  | <b>-0.90</b> | <b>-2.75</b>   | <b>0.94</b>      |
| Physical functioning               |  | 0.45      | -5.77  | 6.66   | 0.45         | -14.11         | 15.17            |
| Emotional functioning <sup>a</sup> |  | -2.58     | -7.34  | 2.18   | -2.58        | -33.43         | 28.27            |
| Role functioning <sup>a</sup>      |  | 0.03      | -11.74 | 11.81  | 0.03         | -76.29         | 76.35            |
| Social functioning <sup>a</sup>    |  | 0.63      | -6.06  | 7.33   | 0.32         | -54.48         | 55.12            |
| Sleep quality <sup>a</sup>         |  | -1.00     | -9.80  | 7.80   | -1.00        | -58.04         | 56.04            |
| Nausea <sup>a</sup>                |  | 13.74     | 1.85   | 102.24 | <b>12.27</b> | <b>0.00002</b> | <b>6226242.0</b> |
| Constipation                       |  | 7.77      | 1.22   | 49.43  | <b>7.84</b>  | <b>0.15</b>    | <b>409.54</b>    |
| Dizziness <sup>a</sup>             |  | 1.18      | 0.49   | 2.85   | 1.22         | 0.004          | 418.34           |
| Drowsiness <sup>a</sup>            |  | 0.61      | 0.28   | 1.36   | 0.67         | 0.0003         | 1409.89          |
| <b>Opioids vs antidepressants</b>  |  |           |        |        |              |                |                  |
| Pain                               |  | -0.15     | -1.04  | 0.74   | -0.15        | -2.09          | 1.79             |
| Physical functioning <sup>a</sup>  |  | -5.29     | -13.70 | 3.12   | -5.29        | -59.81         | 49.22            |
| Emotional functioning <sup>a</sup> |  | -6.19     | -11.00 | -1.38  | -6.76        | -51.02         | 37.49            |
| Role functioning <sup>a</sup>      |  | -5.14     | -19.82 | 9.55   | -5.14        | -100.36        | 90.09            |
| Social functioning <sup>a</sup>    |  | -4.39     | -12.15 | 3.37   | -4.39        | -54.71         | 45.92            |

WMD: Weighted mean difference; RR: relative risk; 95%CI: 95% confidence interval; DL: DerSimonian-Laird; HKSJ: Hartung-Knapp-Sidik-Jonkman

<sup>a</sup> Fixed-effects model was used when only two trials contributed to a meta-analysis

Treatment effects that changed from significant to non-significant with the HKSJ approach are **bolded**.

**eFigure 1: Meta-regression for pain relief and length of follow-up for 80 randomized clinical trials of opioids vs. placebo**

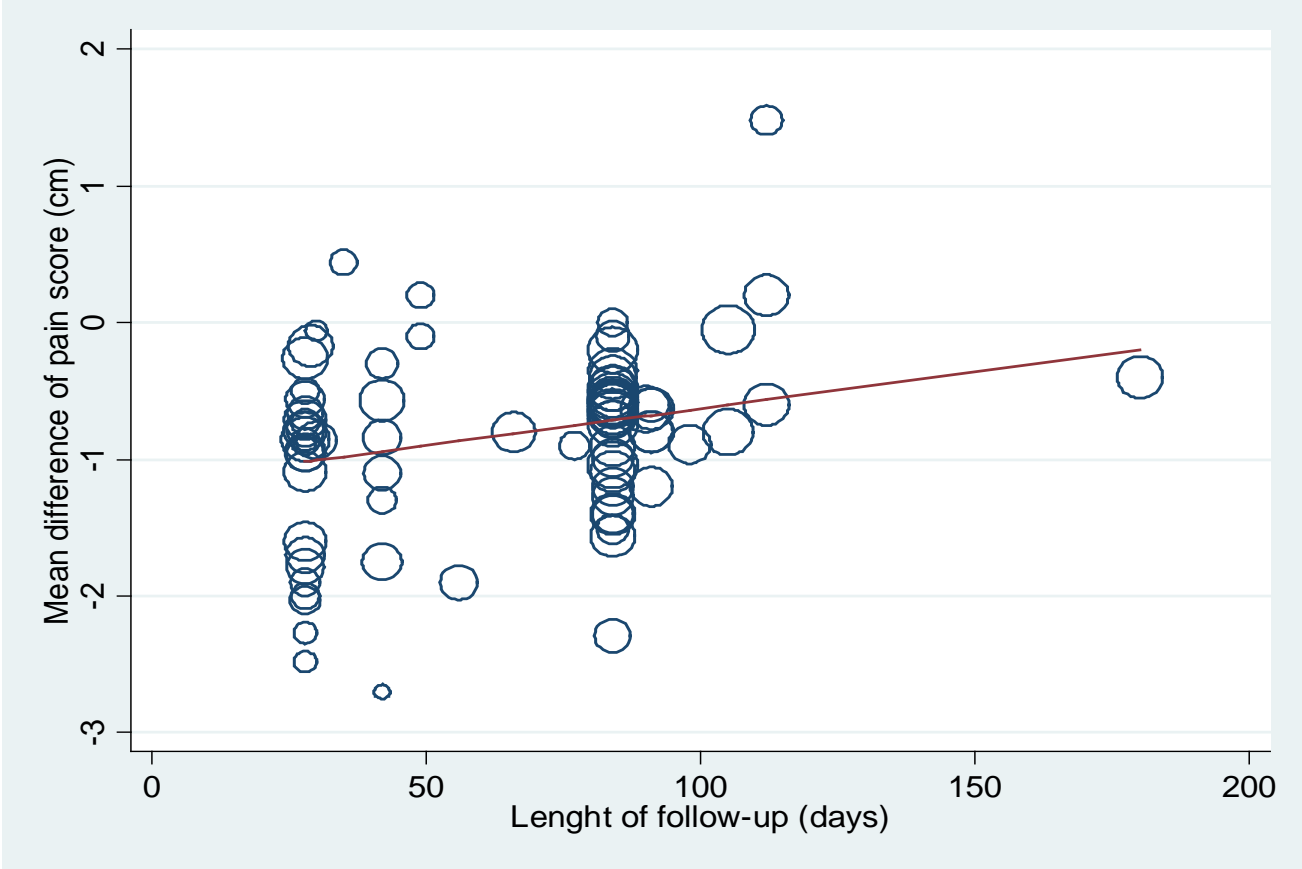

p-value = 0.007 for the slope among 80 trials

The size of circle represents the weight of each study in the fitted random-effects meta-regression model (i.e. the inverse of its total variance)

**eFigure 2: Subgroup analysis for pain relief and length of follow-up (<3 months vs. ≥3 months) from 80 randomized clinical trials of opioids vs. placebo**

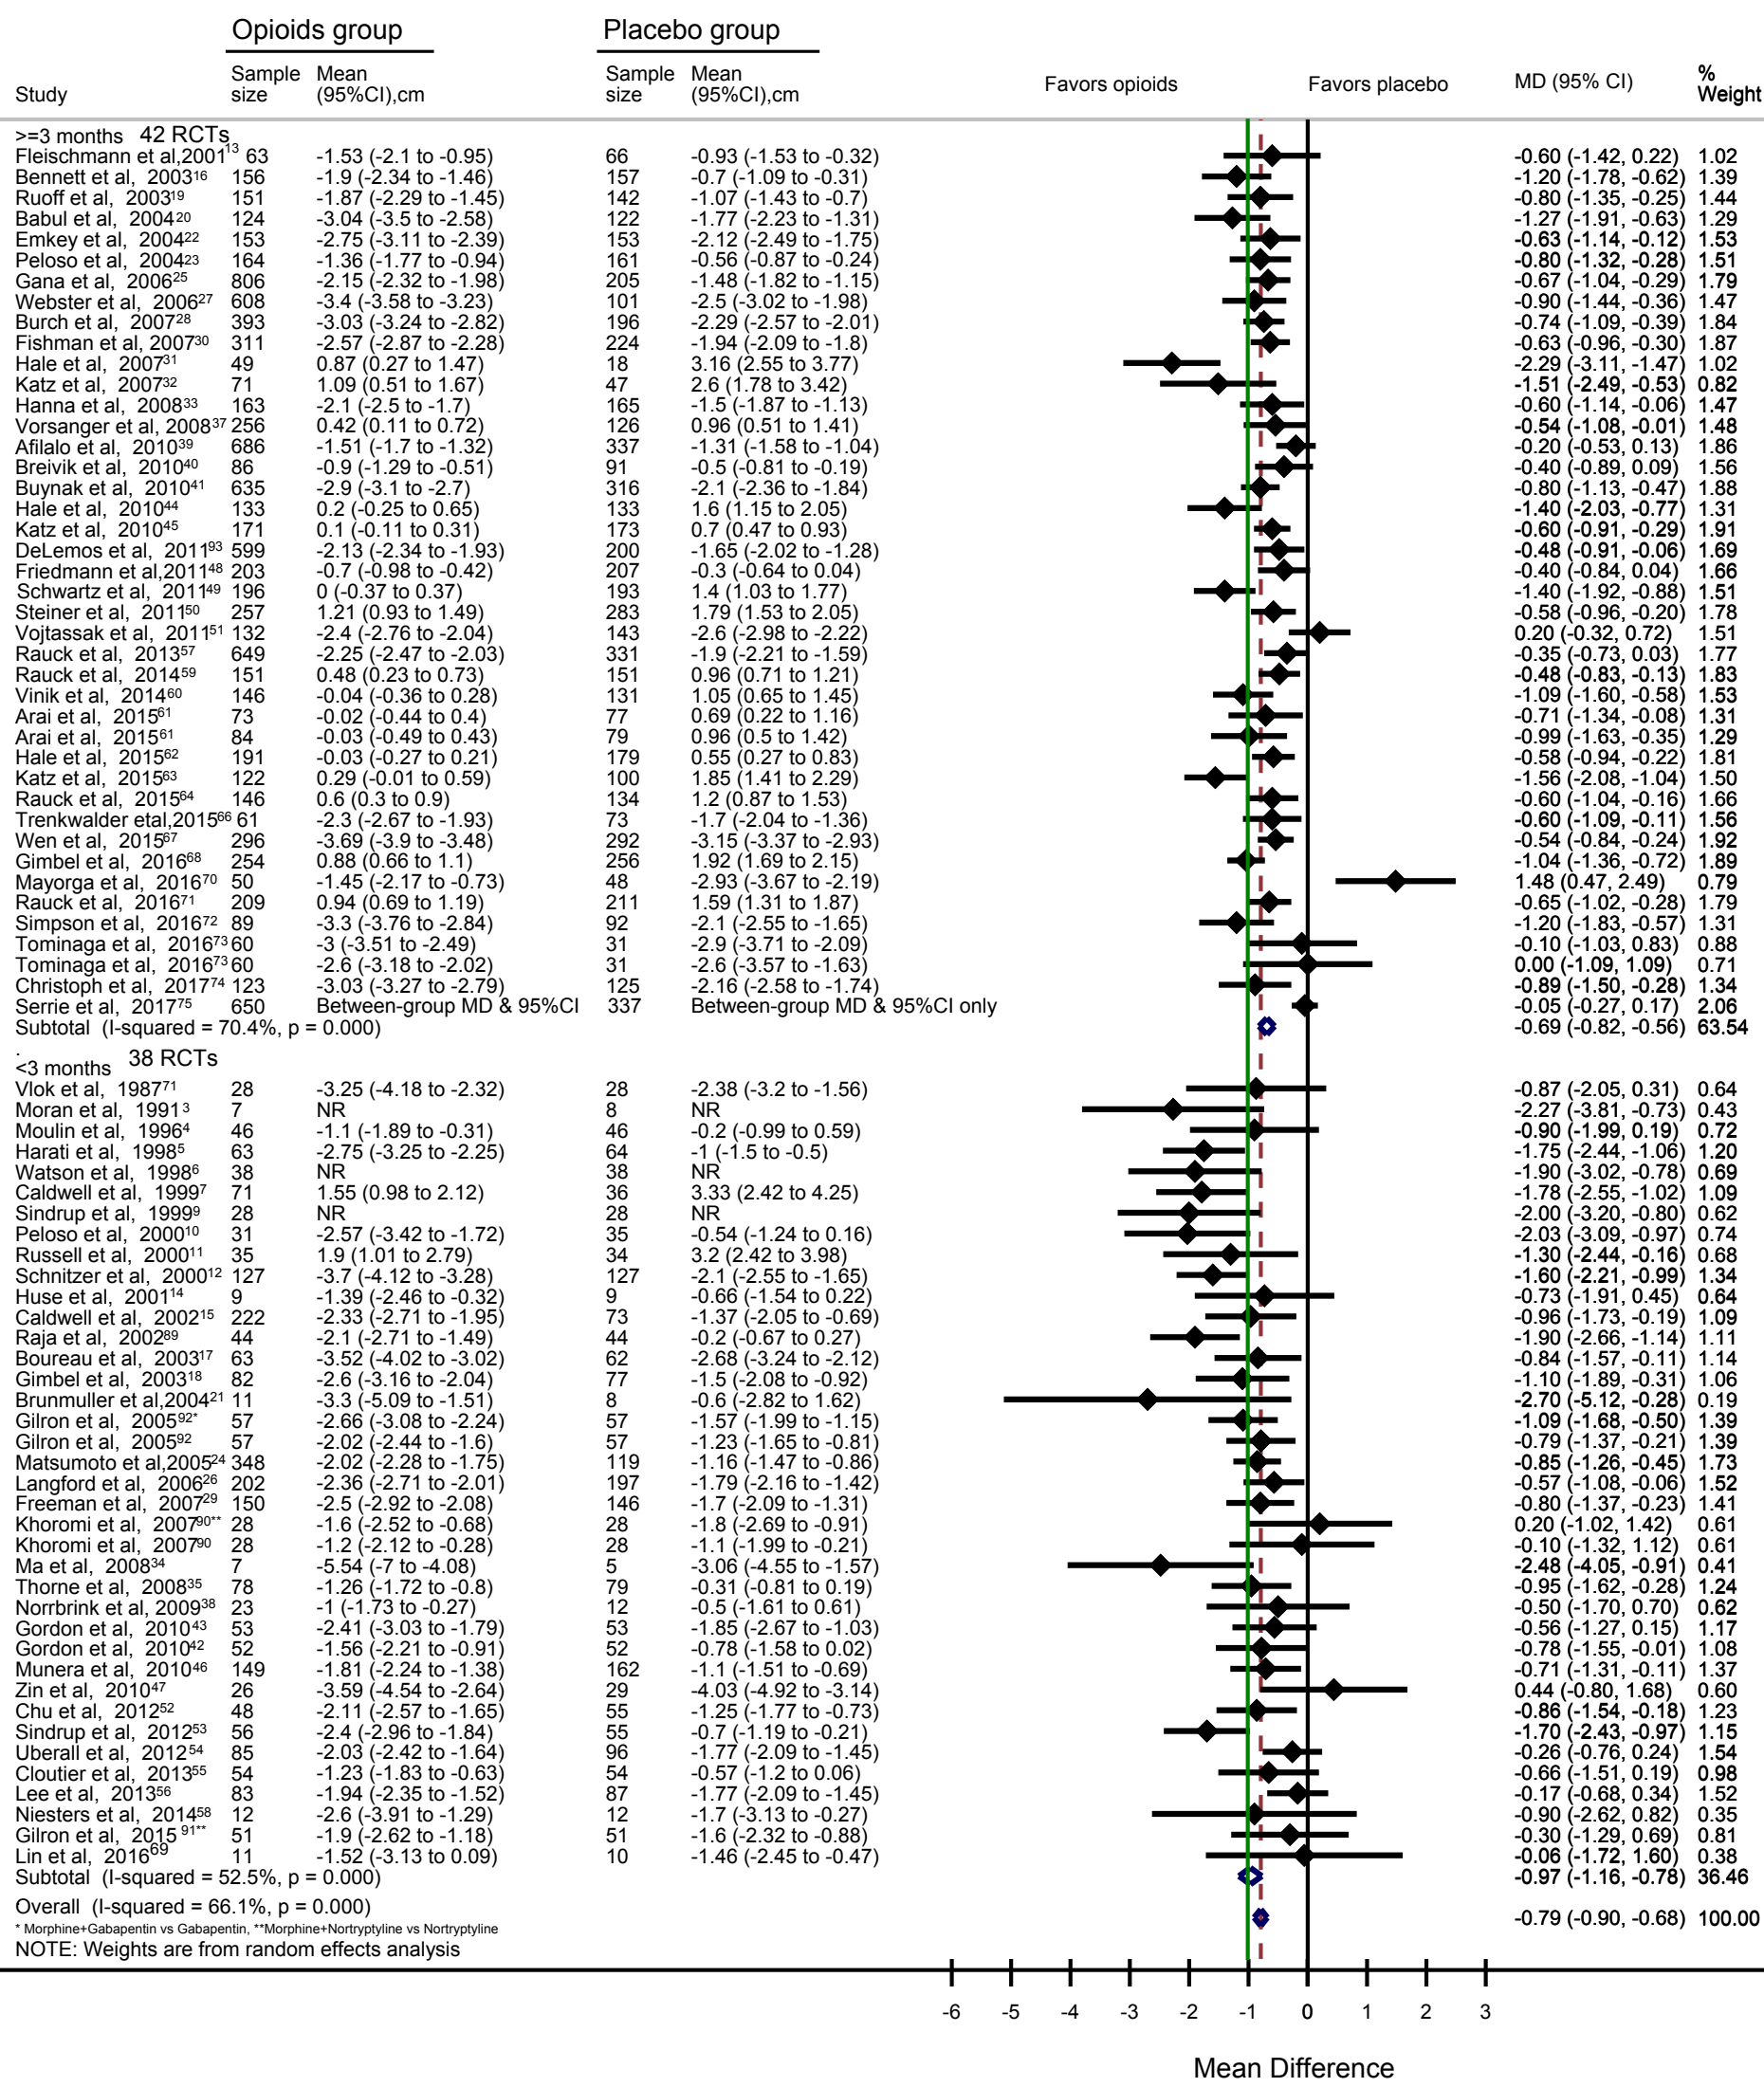

Test of interaction p=0.04; RCTs: Randomized clinical trials; MD: mean difference; CI: confidence interval; NR: not reported due to imputed data from mean difference & 95%CI of end-of-study score; the green line represents the minimally important difference. The mean and 95%CI in each group are within-group change from baseline data, and the mean difference (MD) and 95%CI are between-group differences in change from baseline data.

**eFigure 3: Funnel plot for pain relief at  $\geq 3$  months follow-up for 42 randomized clinical trials of opioids vs. placebo**

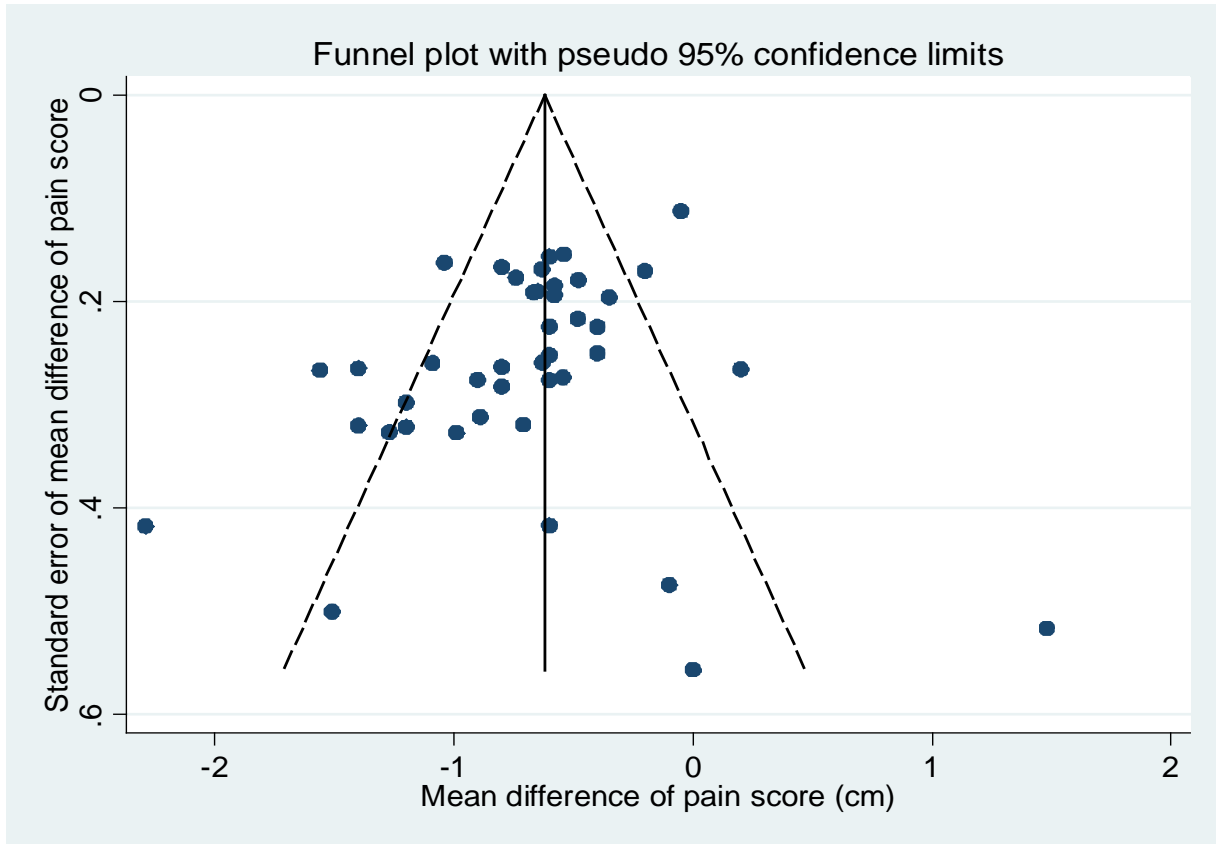

Begg's test p-value = 0.07 among 42 trials with pain relief at  $\geq 3$  months follow-up

**eFigure 4: Subgroup analysis for pain relief and objective vs. subjective conditions from 76 randomized clinical trials of opioids vs. placebo**

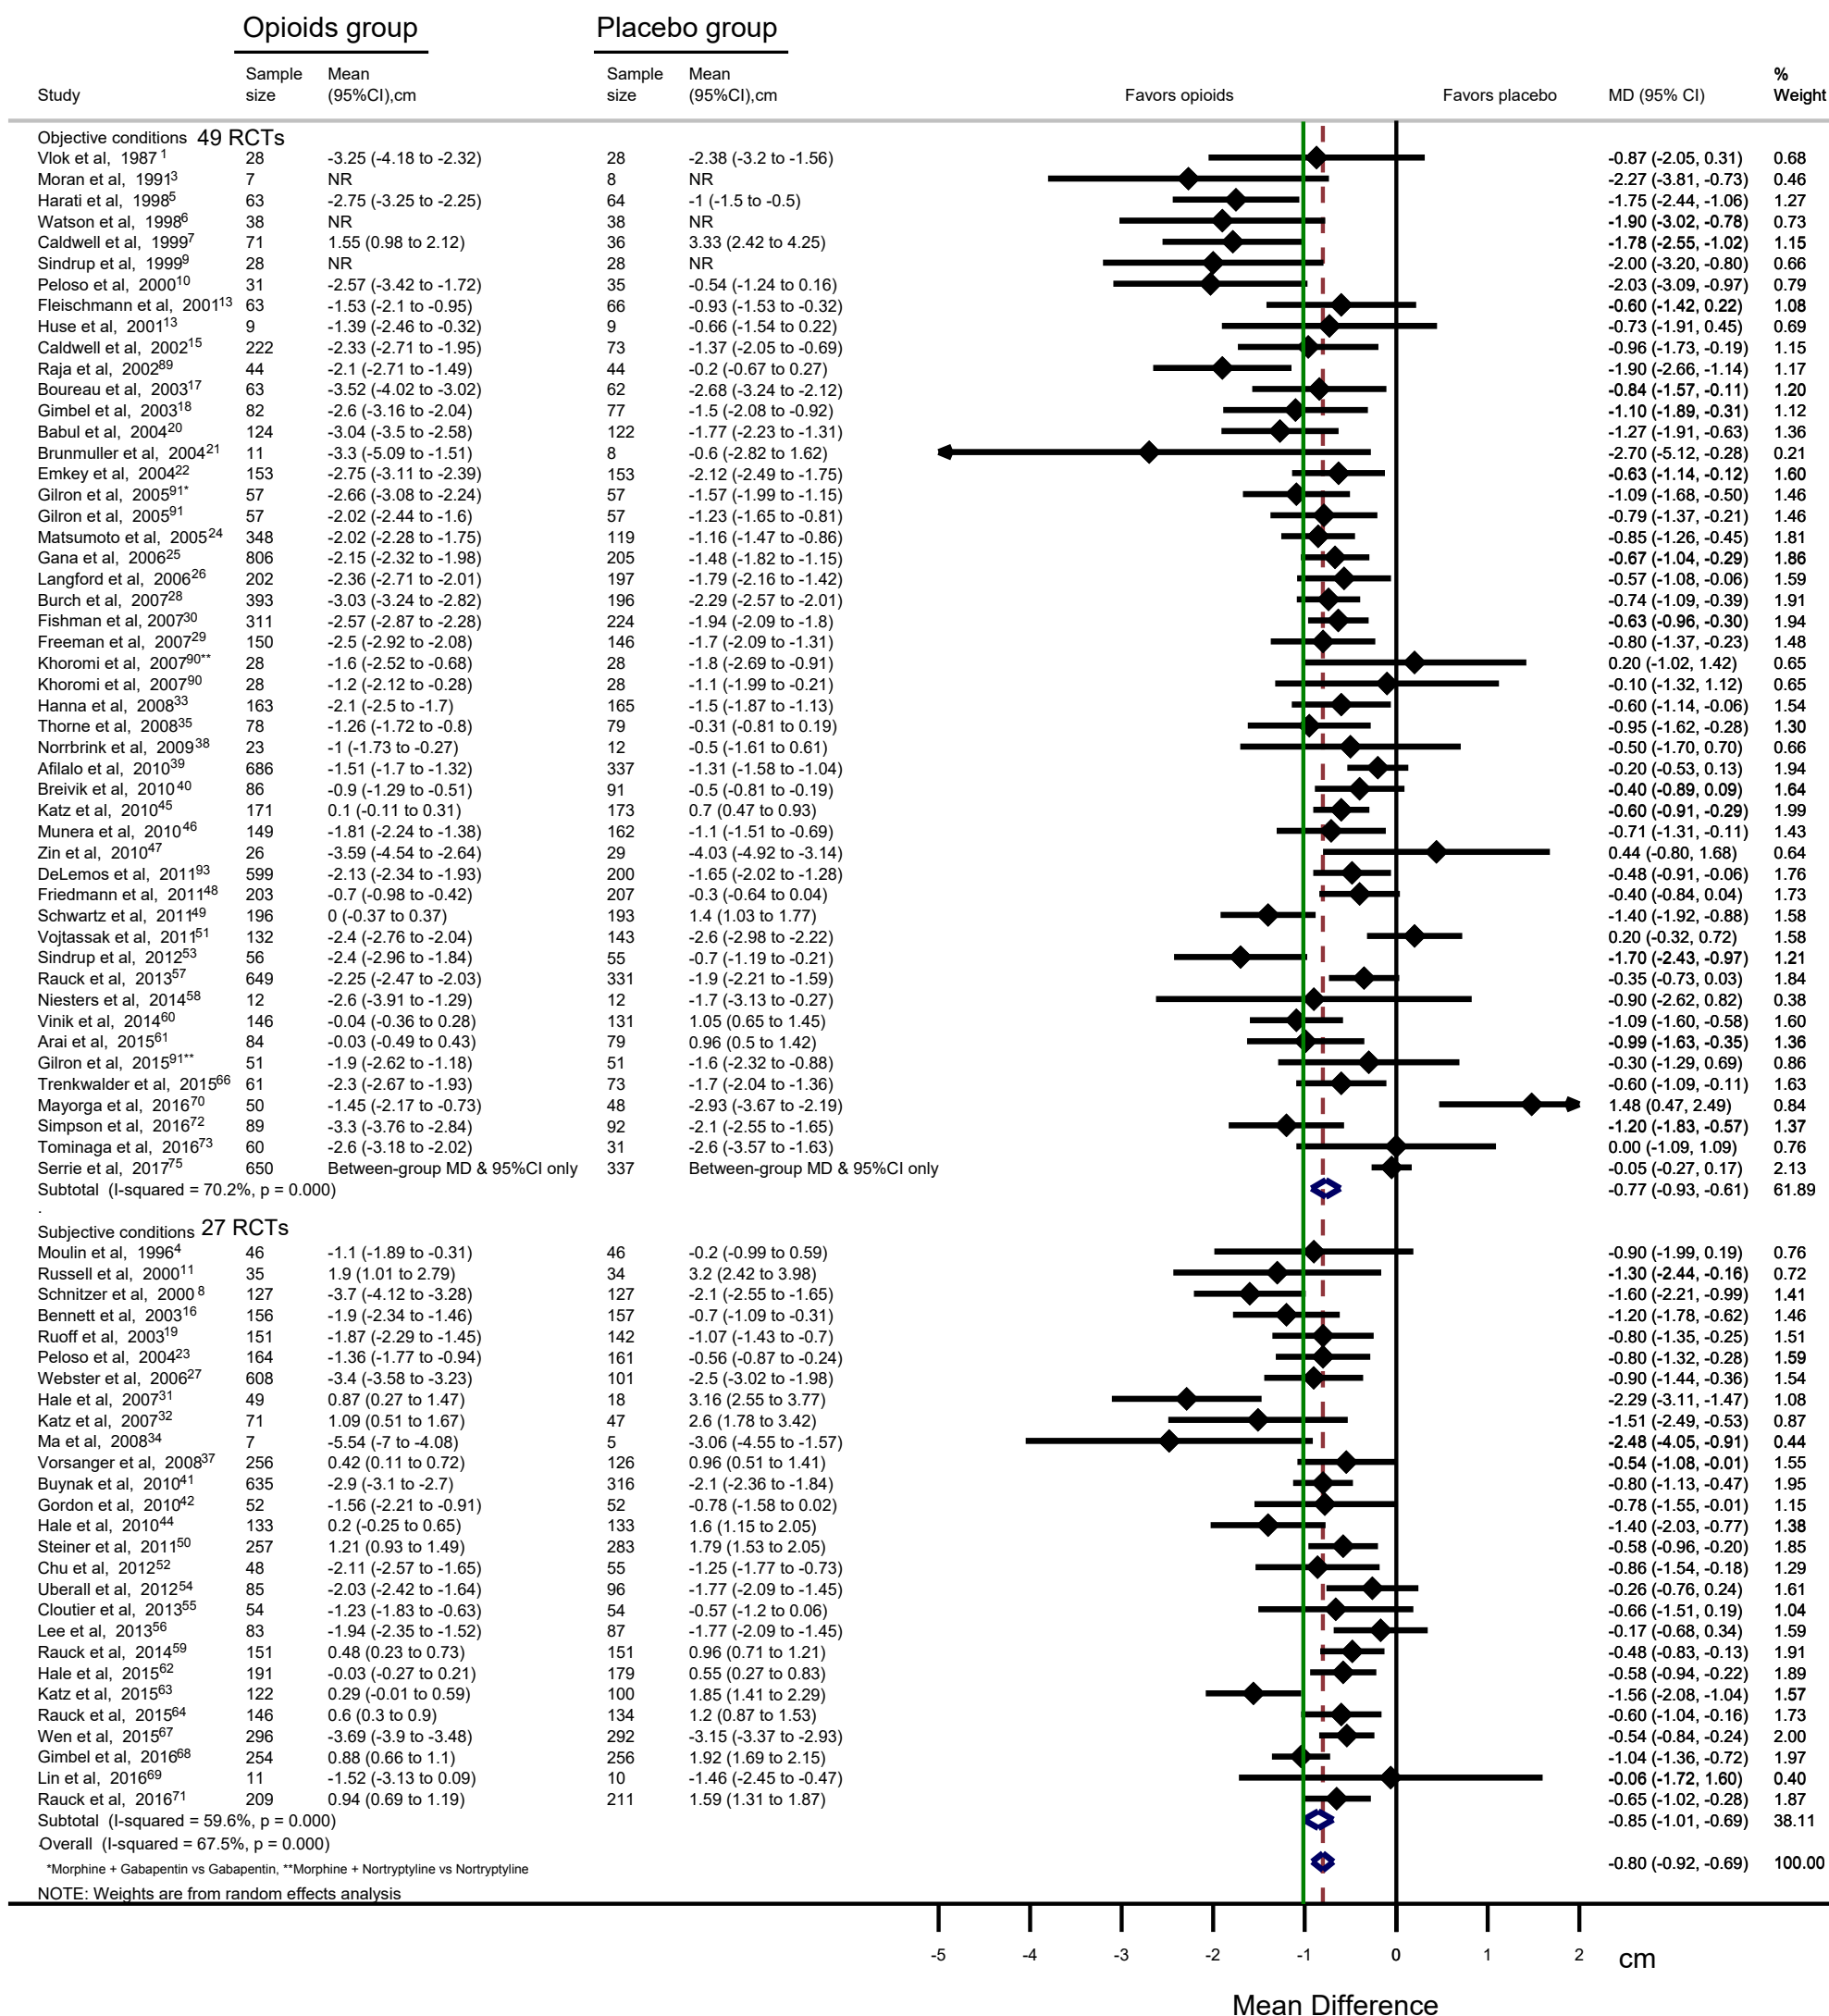

Test of interaction p-value = 0.45; RCTs: Randomized clinical trials; NR: not reported due to imputed data from mean difference & 95%CI of end-of-study score; Four studies were excluded from this subgroup analysis due to mixed conditions; the green line represents the minimally important difference. The mean and 95%CI in each group are within-group change from baseline data, and the mean difference (MD) and 95%CI are between-group differences in change from baseline data.



**eFigure 5: Subgroup analysis for pain relief and neuropathic vs. nociceptive vs. central sensitization from 76 randomized clinical trials of opioids vs. placebo**

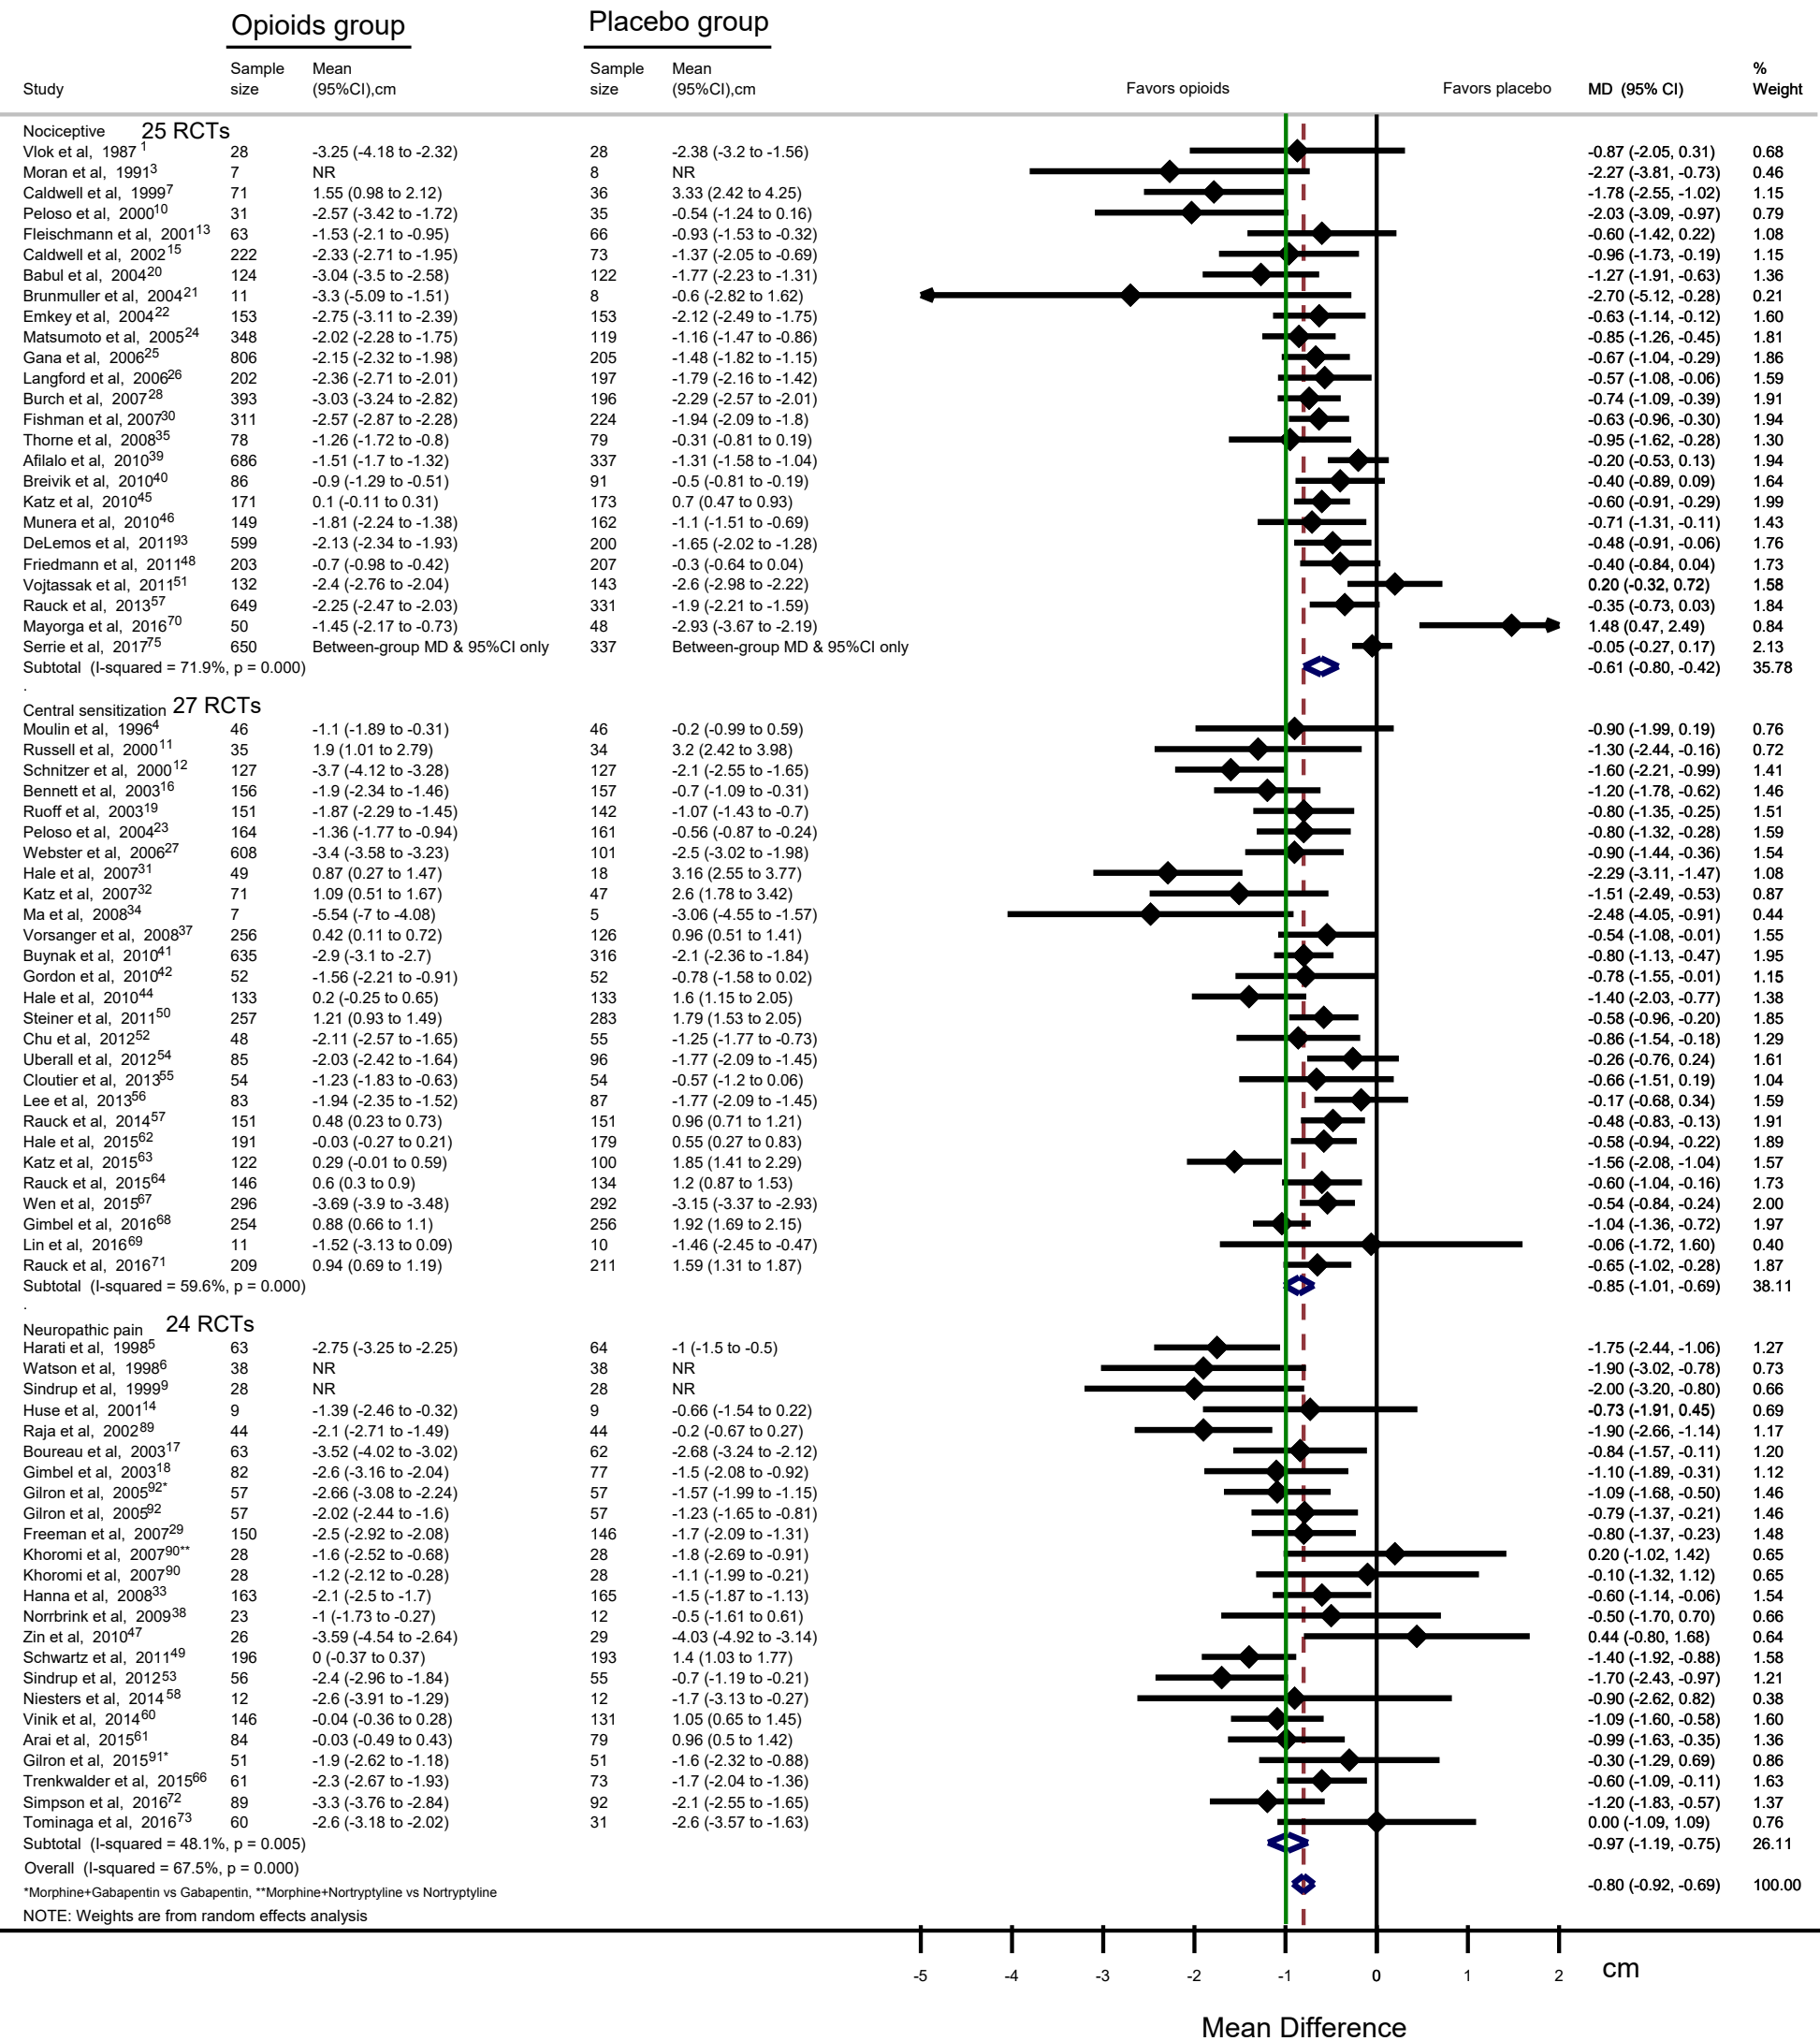

Test of interaction p-value = 0.18; RCTs: Randomized clinical trials; NR: not reported due to imputed data from mean difference & 95%CI of end-of-study score; Four studies were excluded from this subgroup analysis due to mixed conditions; the green line represents the minimally important difference. The mean and 95%CI in each group are within-group change from baseline data, and the mean difference (MD) and 95%CI are between-group differences in change from baseline data.

**eFigure 6: Subgroup analysis for pain relief and neuropathic vs. non-neuropathic conditions from 76 randomized clinical trials of opioids vs. placebo**

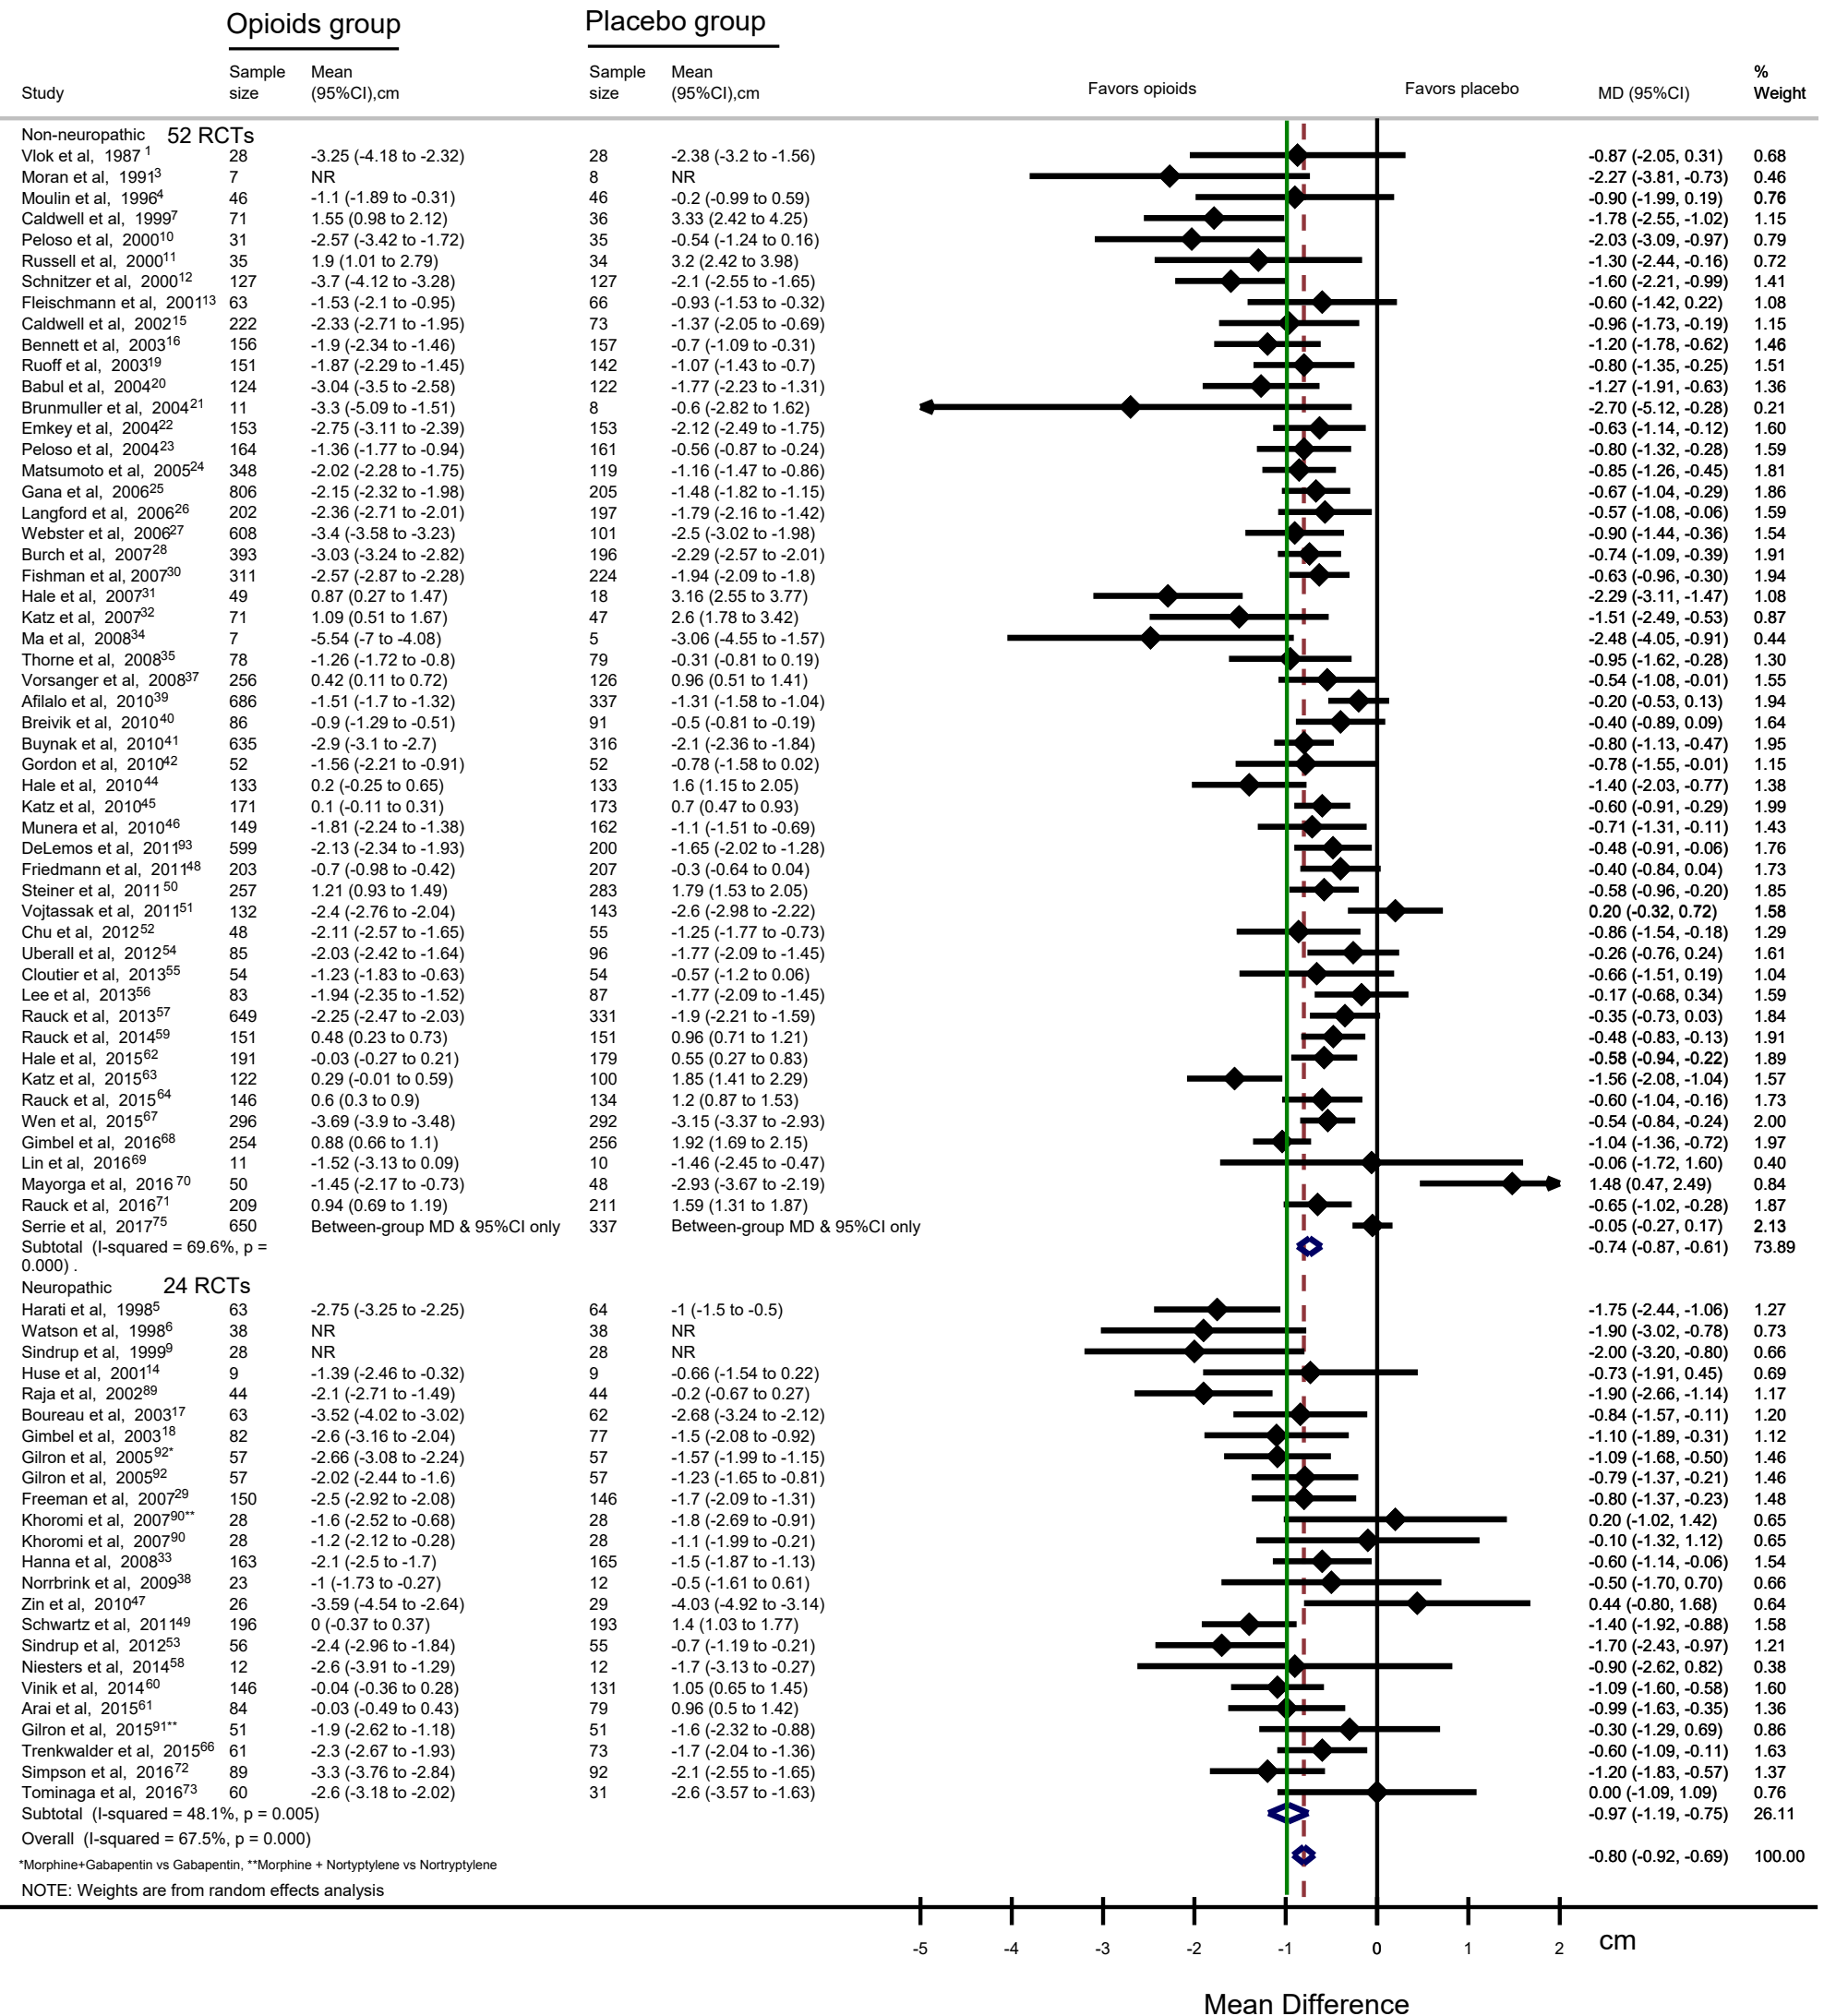

\*Morphine+Gabapentin vs Gabapentin, \*\*Morphine + Nortriptylene vs Nortriptylene

NOTE: Weights are from random effects analysis

Test of interaction p-value = 0.13; RCTs: Randomized clinical trials; NR: not reported due to imputed data from mean difference & 95%CI of end-of-study score; Four studies were excluded from this subgroup analysis due to mixed conditions; the green line represents the minimally important difference. The mean and 95%CI in each group are within-group change from baseline data, and the mean difference (MD) and 95%CI are between-group differences in change from baseline data.

**eFigure 7: Funnel plot for physical function for 51 randomized clinical trials of opioids vs. placebo**

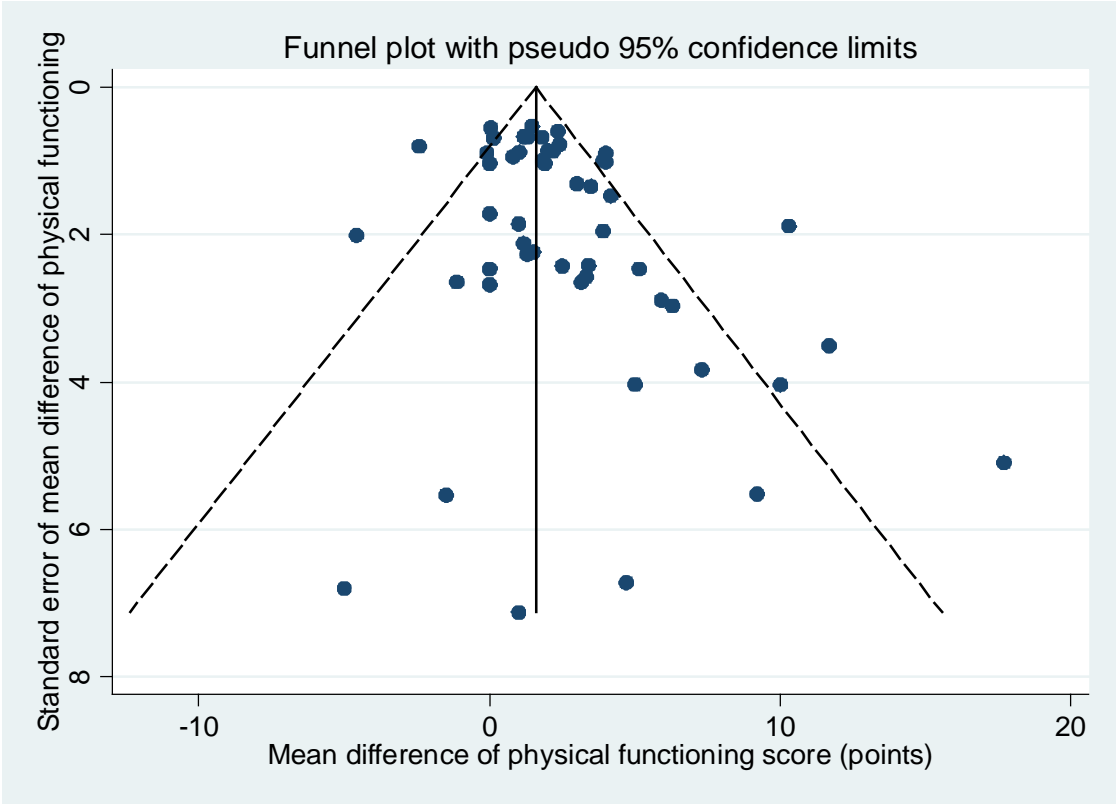

Begg's test p-value = 0.06 among 51 trials

**eFigure 8: Emotional functioning on the SF-36 mental component summary scale among chronic noncancer pain patients receiving opioids vs. placebo from 37 randomized clinical trials**

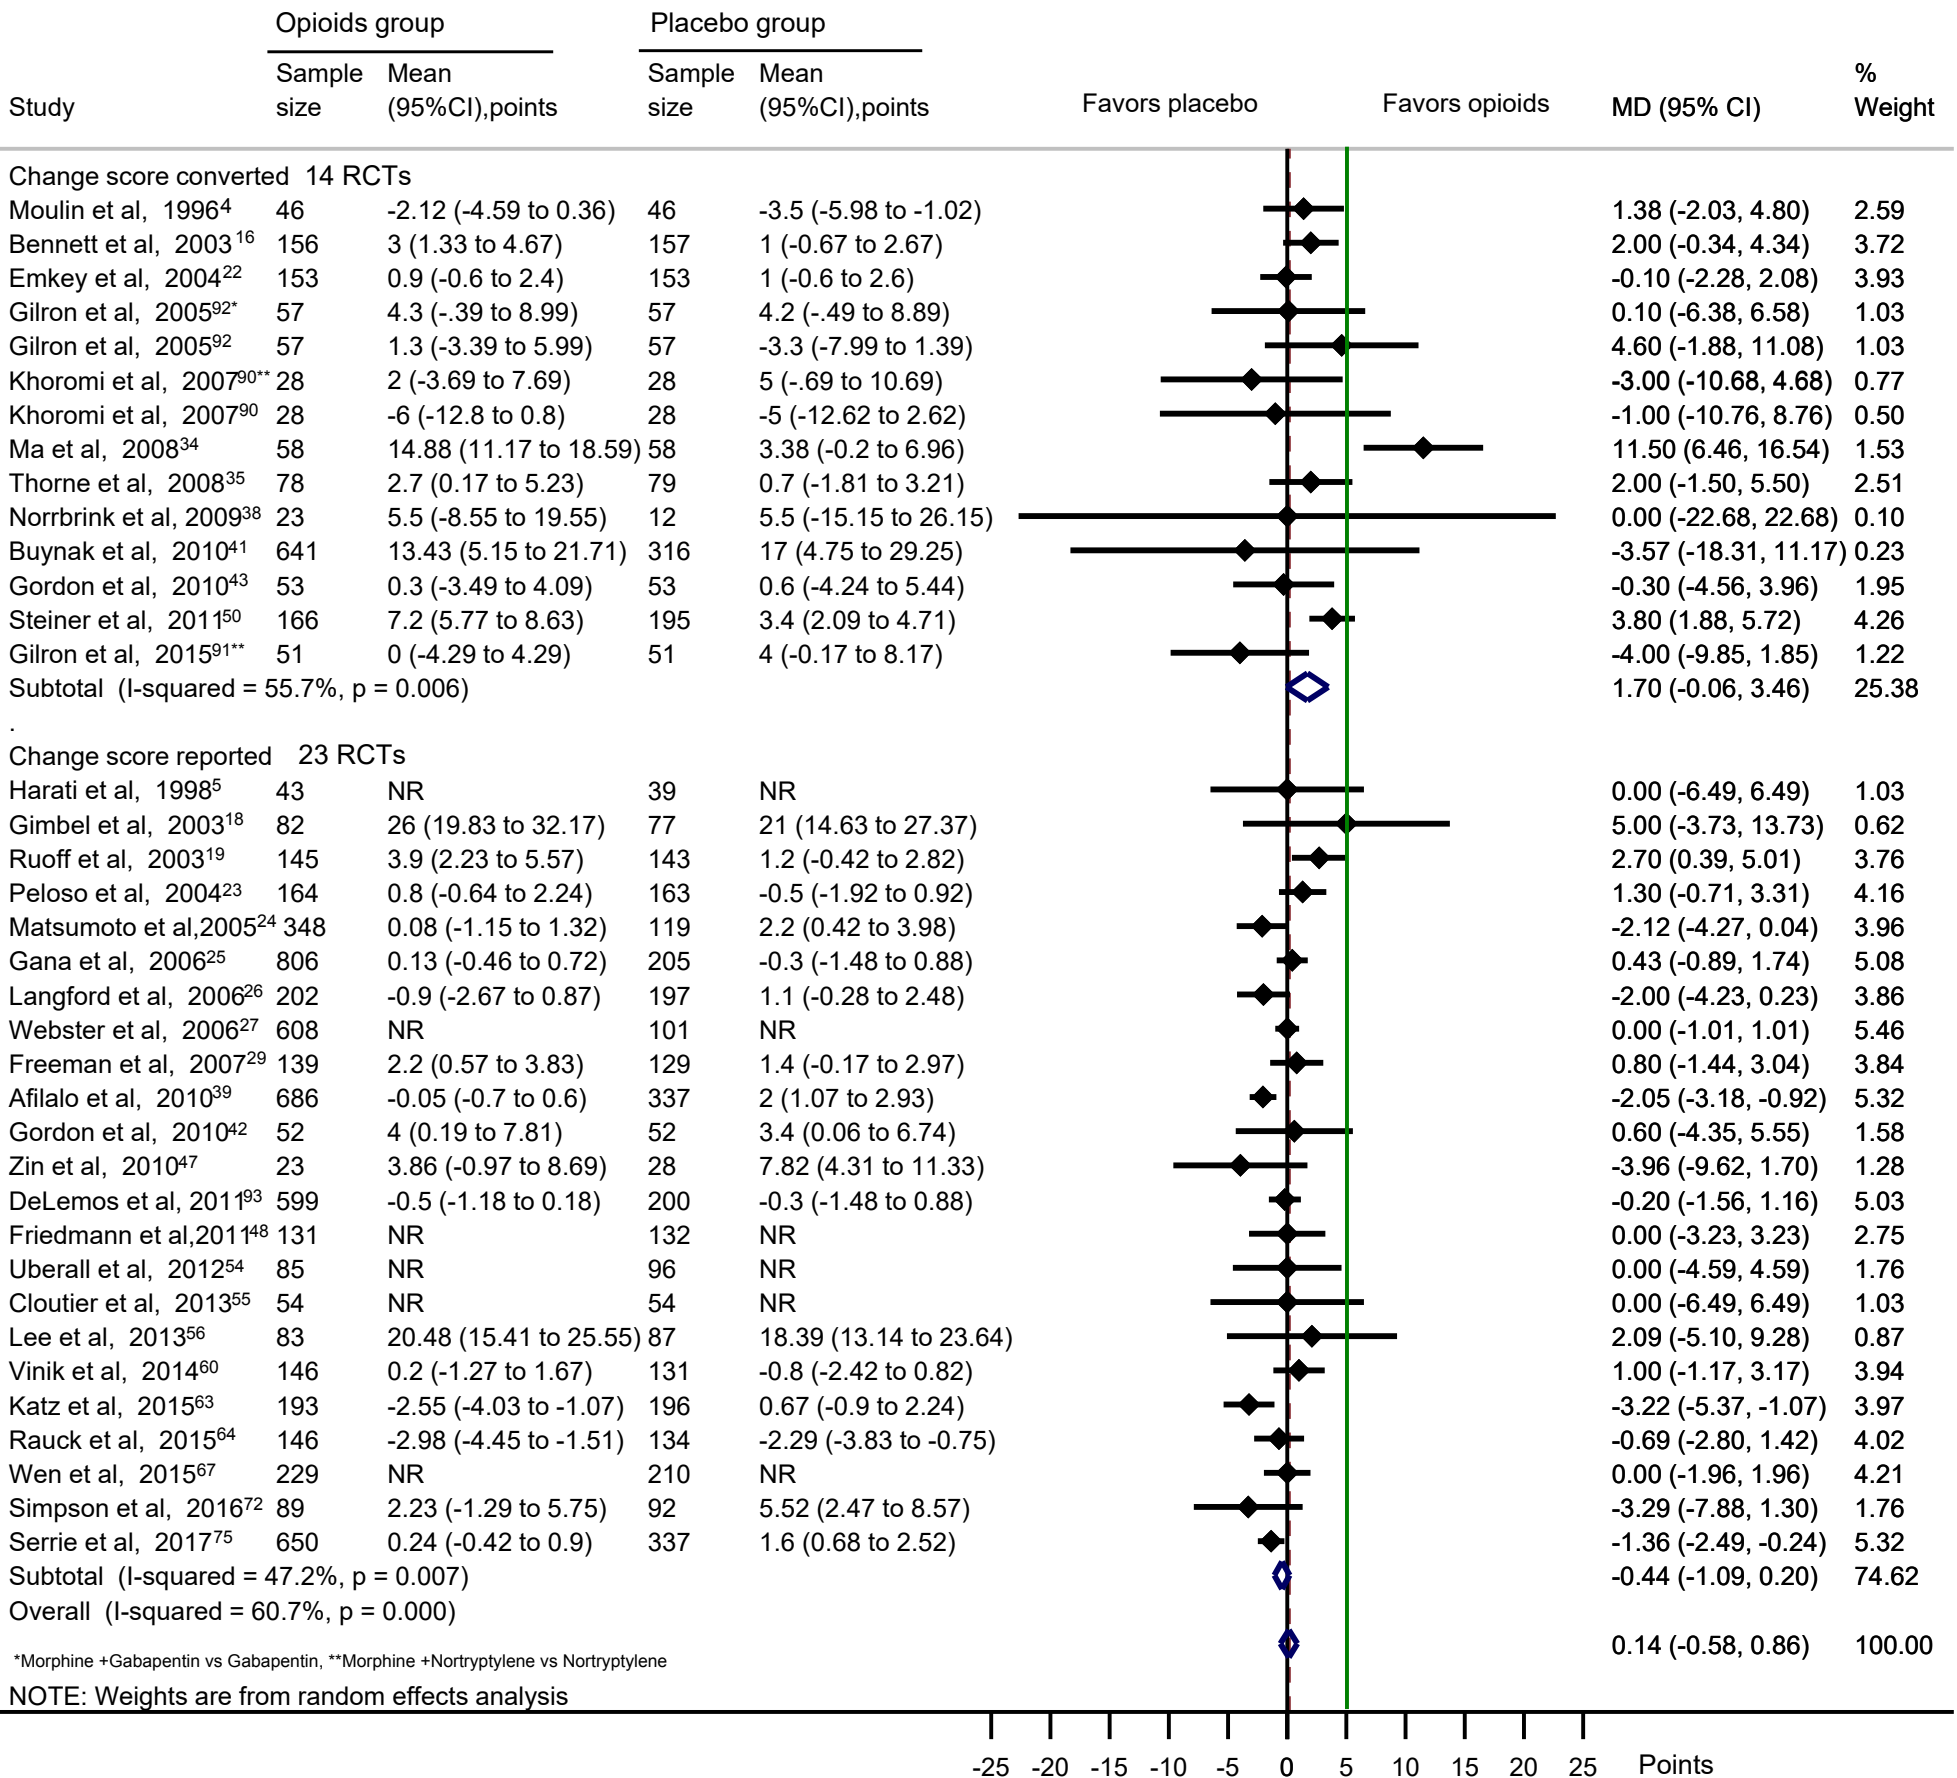

\*Morphine +Gabapentin vs Gabapentin, \*\*Morphine +Nortriptylene vs Nortriptylene

NOTE: Weights are from random effects analysis

-25 -20 -15 -10 -5 0 5 10 15 20 25 Points

Mean Difference

Test of interaction p= 0.01 for reported vs converted change score; RCTs: Randomized clinical trials;

NR: not reported due to imputed data for "not-significant" results; the green line represents the minimally important difference. Change score converted means the change score was not reported directly, but converted from baseline and end-of-study scores. The mean and 95%CI in each group are within-group change from baseline data, and the mean difference (MD) and 95%CI are between-group differences in change from baseline data. © 2018 American Medical Association. All rights reserved.

**eFigure 9: Role functioning on the SF-36 role limitations due to physical problems sub-scale among chronic noncancer pain patients receiving opioids vs. placebo from 32 randomized clinical trials**

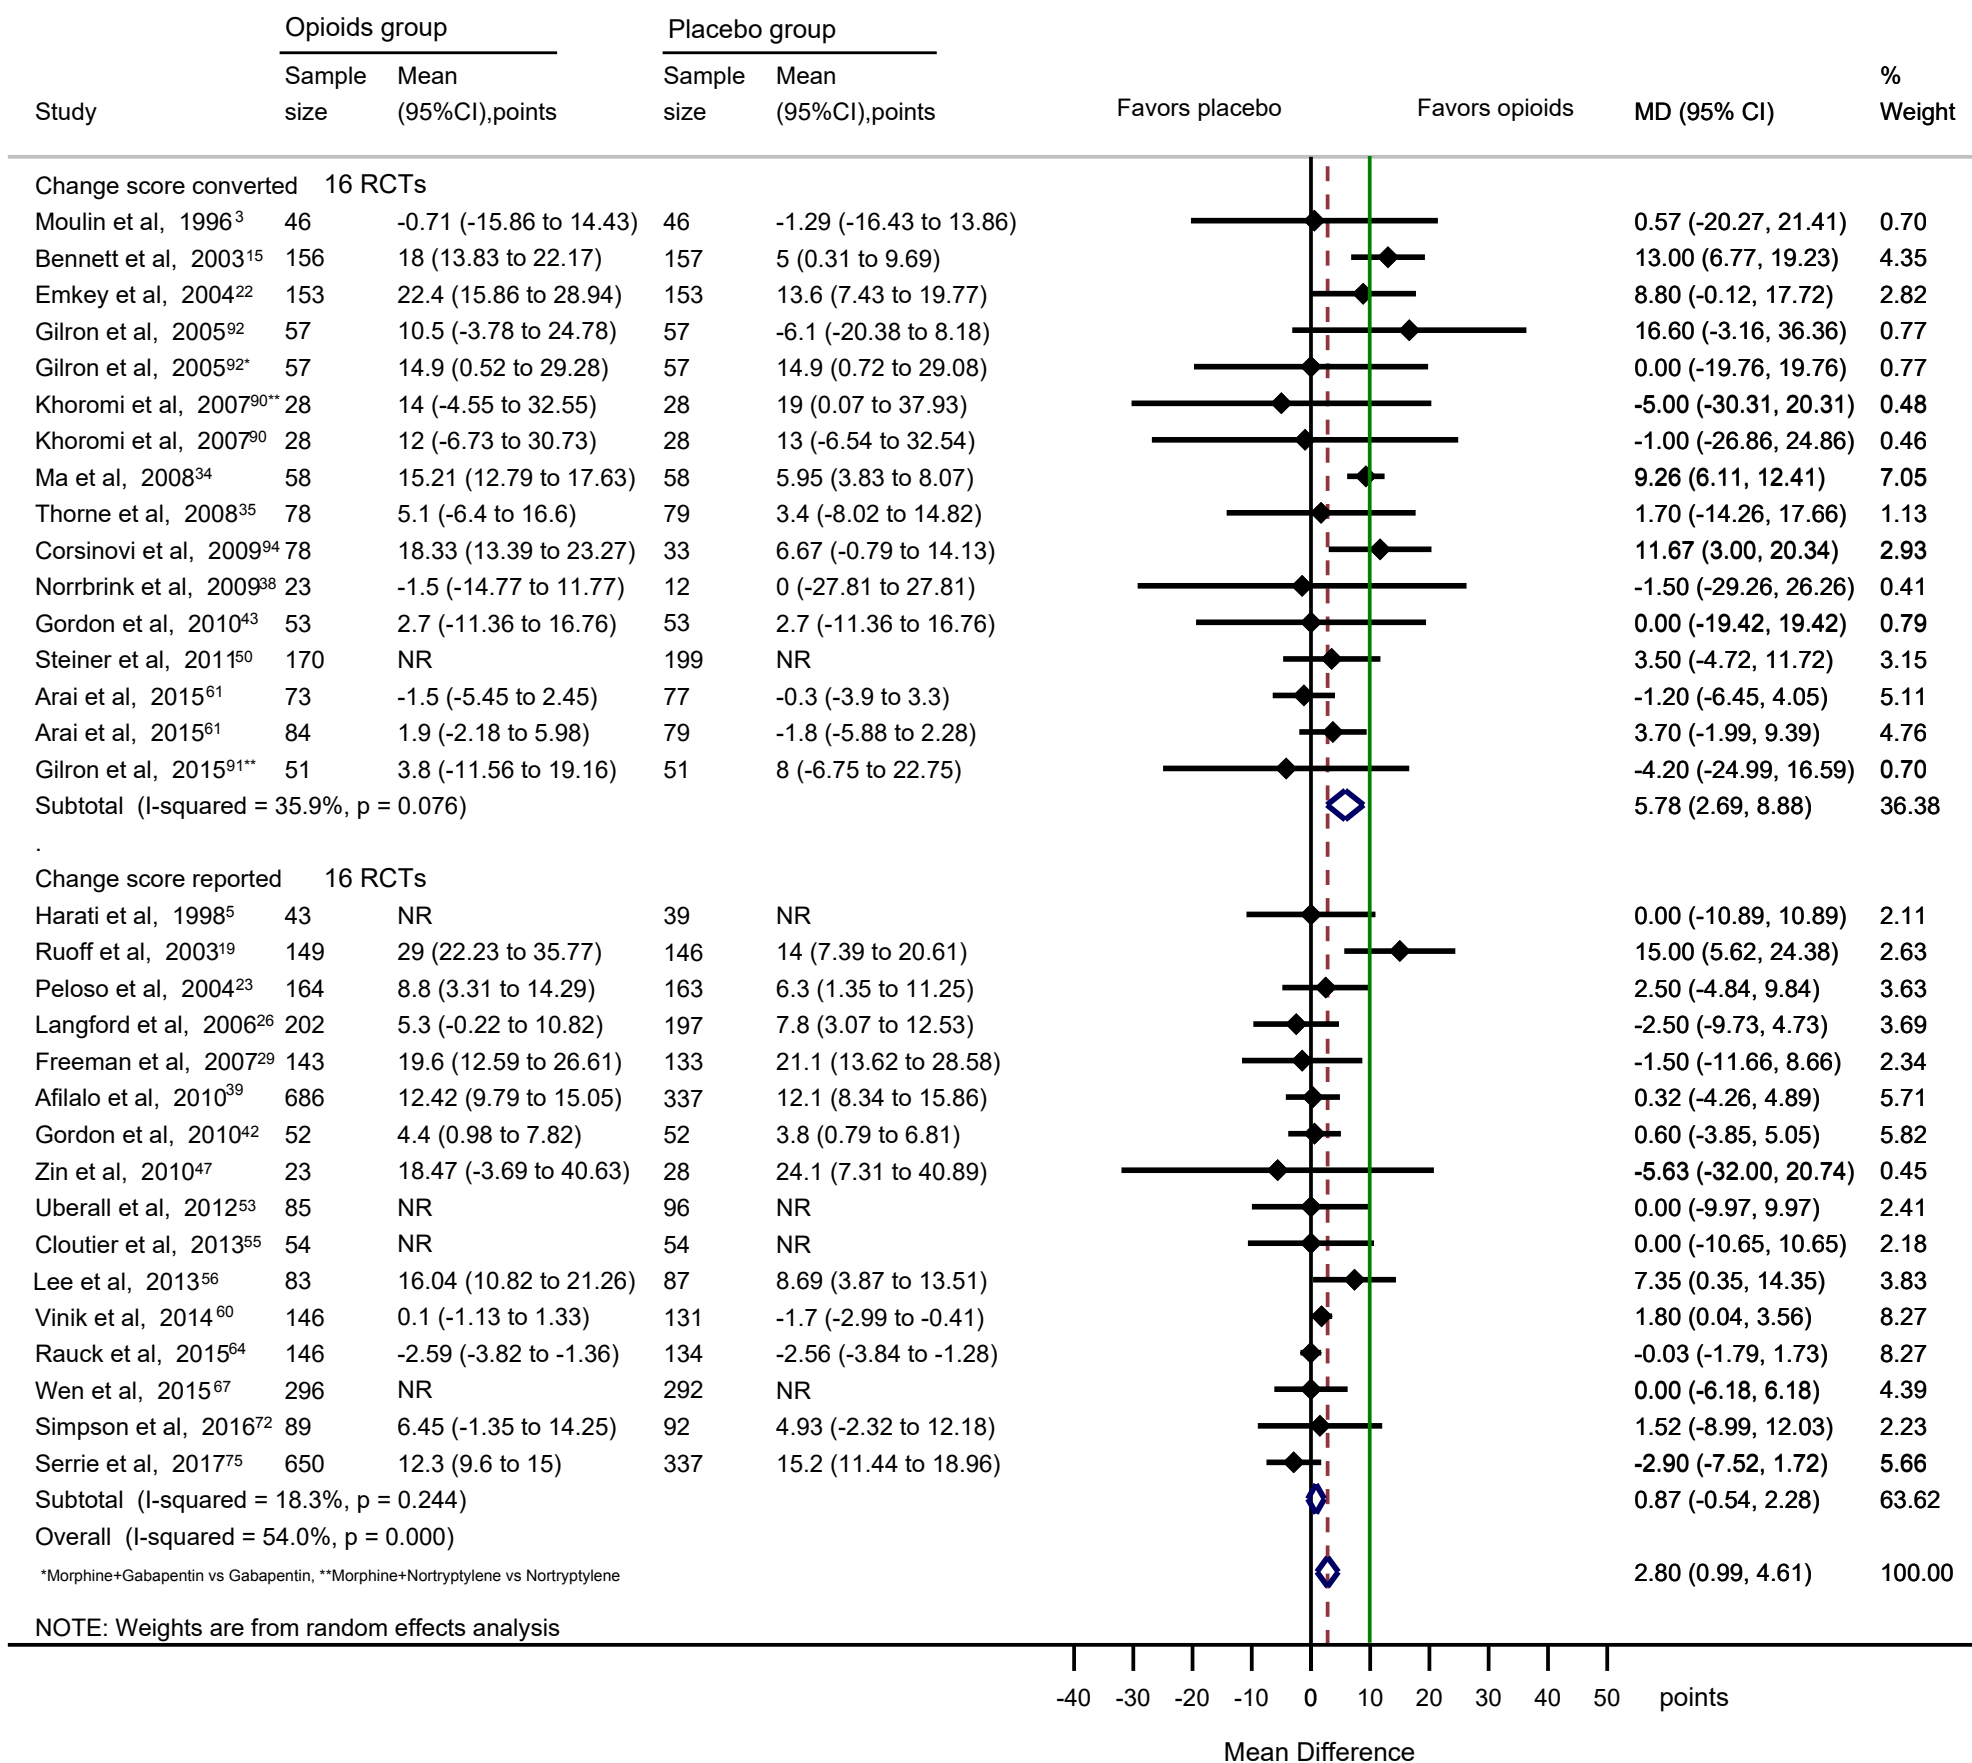

NOTE: Weights are from random effects analysis

Test of interaction p = 0.007 for reported vs converted change score; RCTs: Randomized clinical trials;

NR: not reported due to imputed data from mean difference & 95%CI of end-of-study score or for non-significant results; the green line represents the minimally important difference. Change score converted means the change score was not reported directly, but converted from baseline and end-of-study scores. The mean and 95%CI in each group are within-group change from baseline data, and the mean difference (MD) and 95%CI are between-group differences in change from baseline data.

**eFigure 10: Social functioning on the SF-36 social functioning sub-scale among chronic noncancer pain patients receiving opioids vs. placebo from 29 randomized clinical trials**

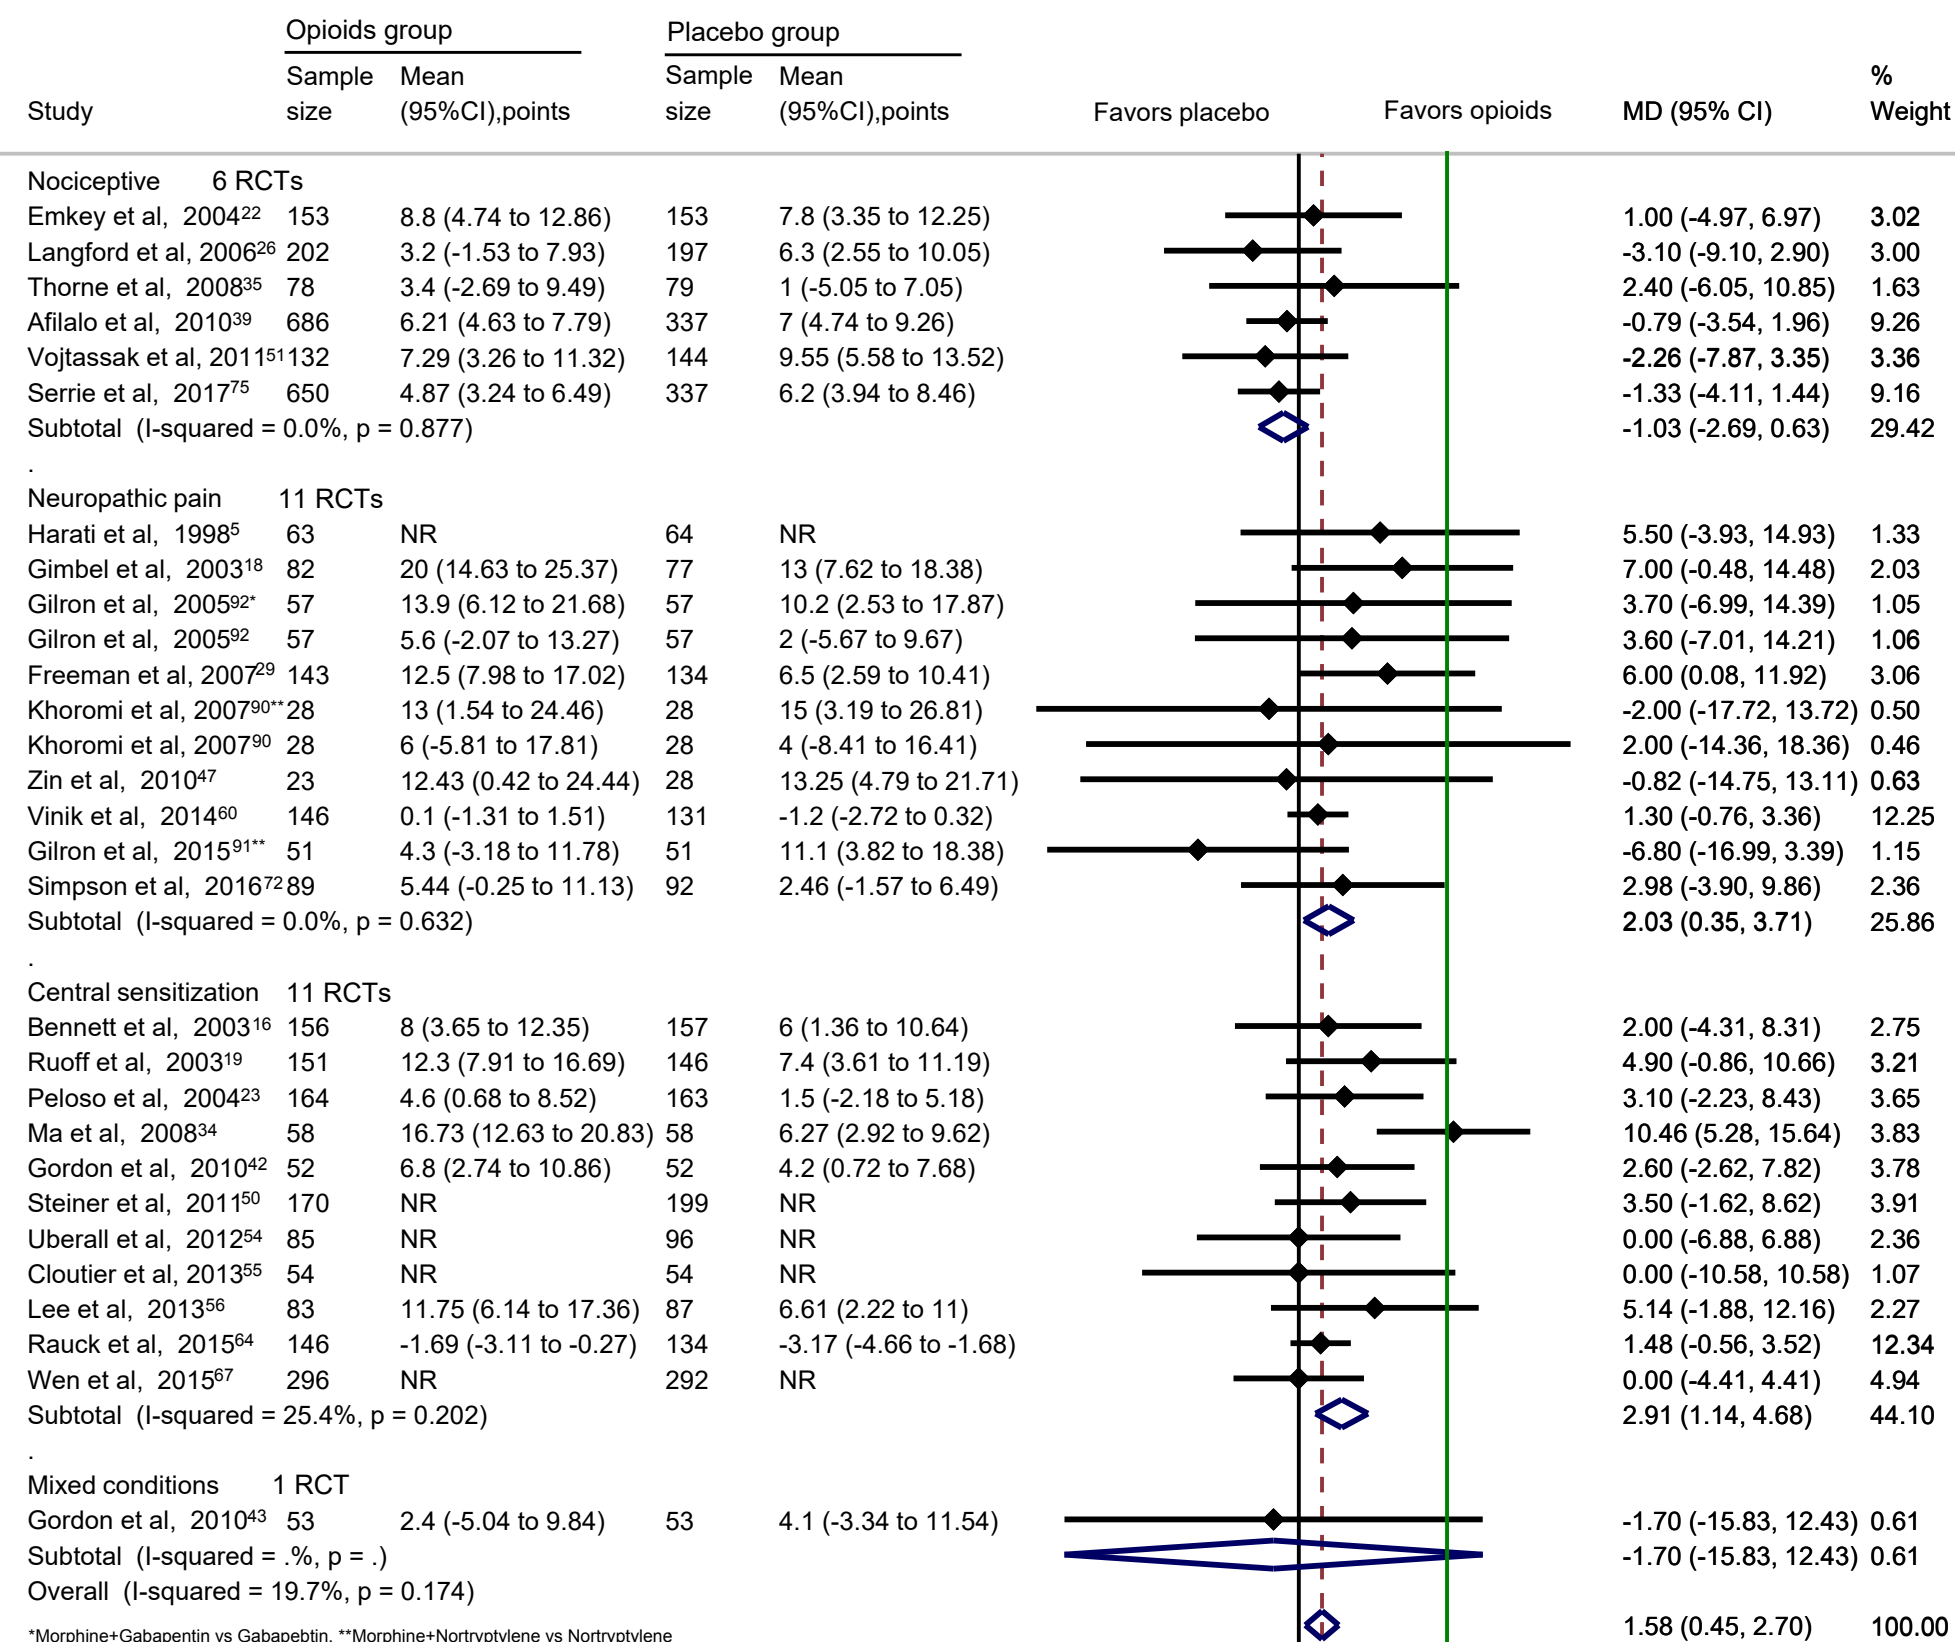

\*Morphine+Gabapentin vs Gabapentin, \*\*Morphine+Nortryptilene vs Nortryptilene

NOTE: Weights are from random effects analysis

Test of interaction p = 0.01 for Neuropathic vs. Nociceptive vs. Central Sensitization; RCTs: Randomized clinical trials; NR: not reported due imputed data from mean difference & 95%CI of end-of-study score or for non-significant results; the green line represents the minimally important difference. Change score converted means the change score was not reported directly, but converted from baseline and end-of-study scores. The mean and 95%CI in each group are within-group change from baseline data, and the mean difference (MD) and 95%CI are between-group differences in change from baseline data.

**eFigure 11: Sleep quality on a 100 mm VAS among chronic noncancer pain patients receiving opioids vs. placebo from 31 randomized clinical trials**

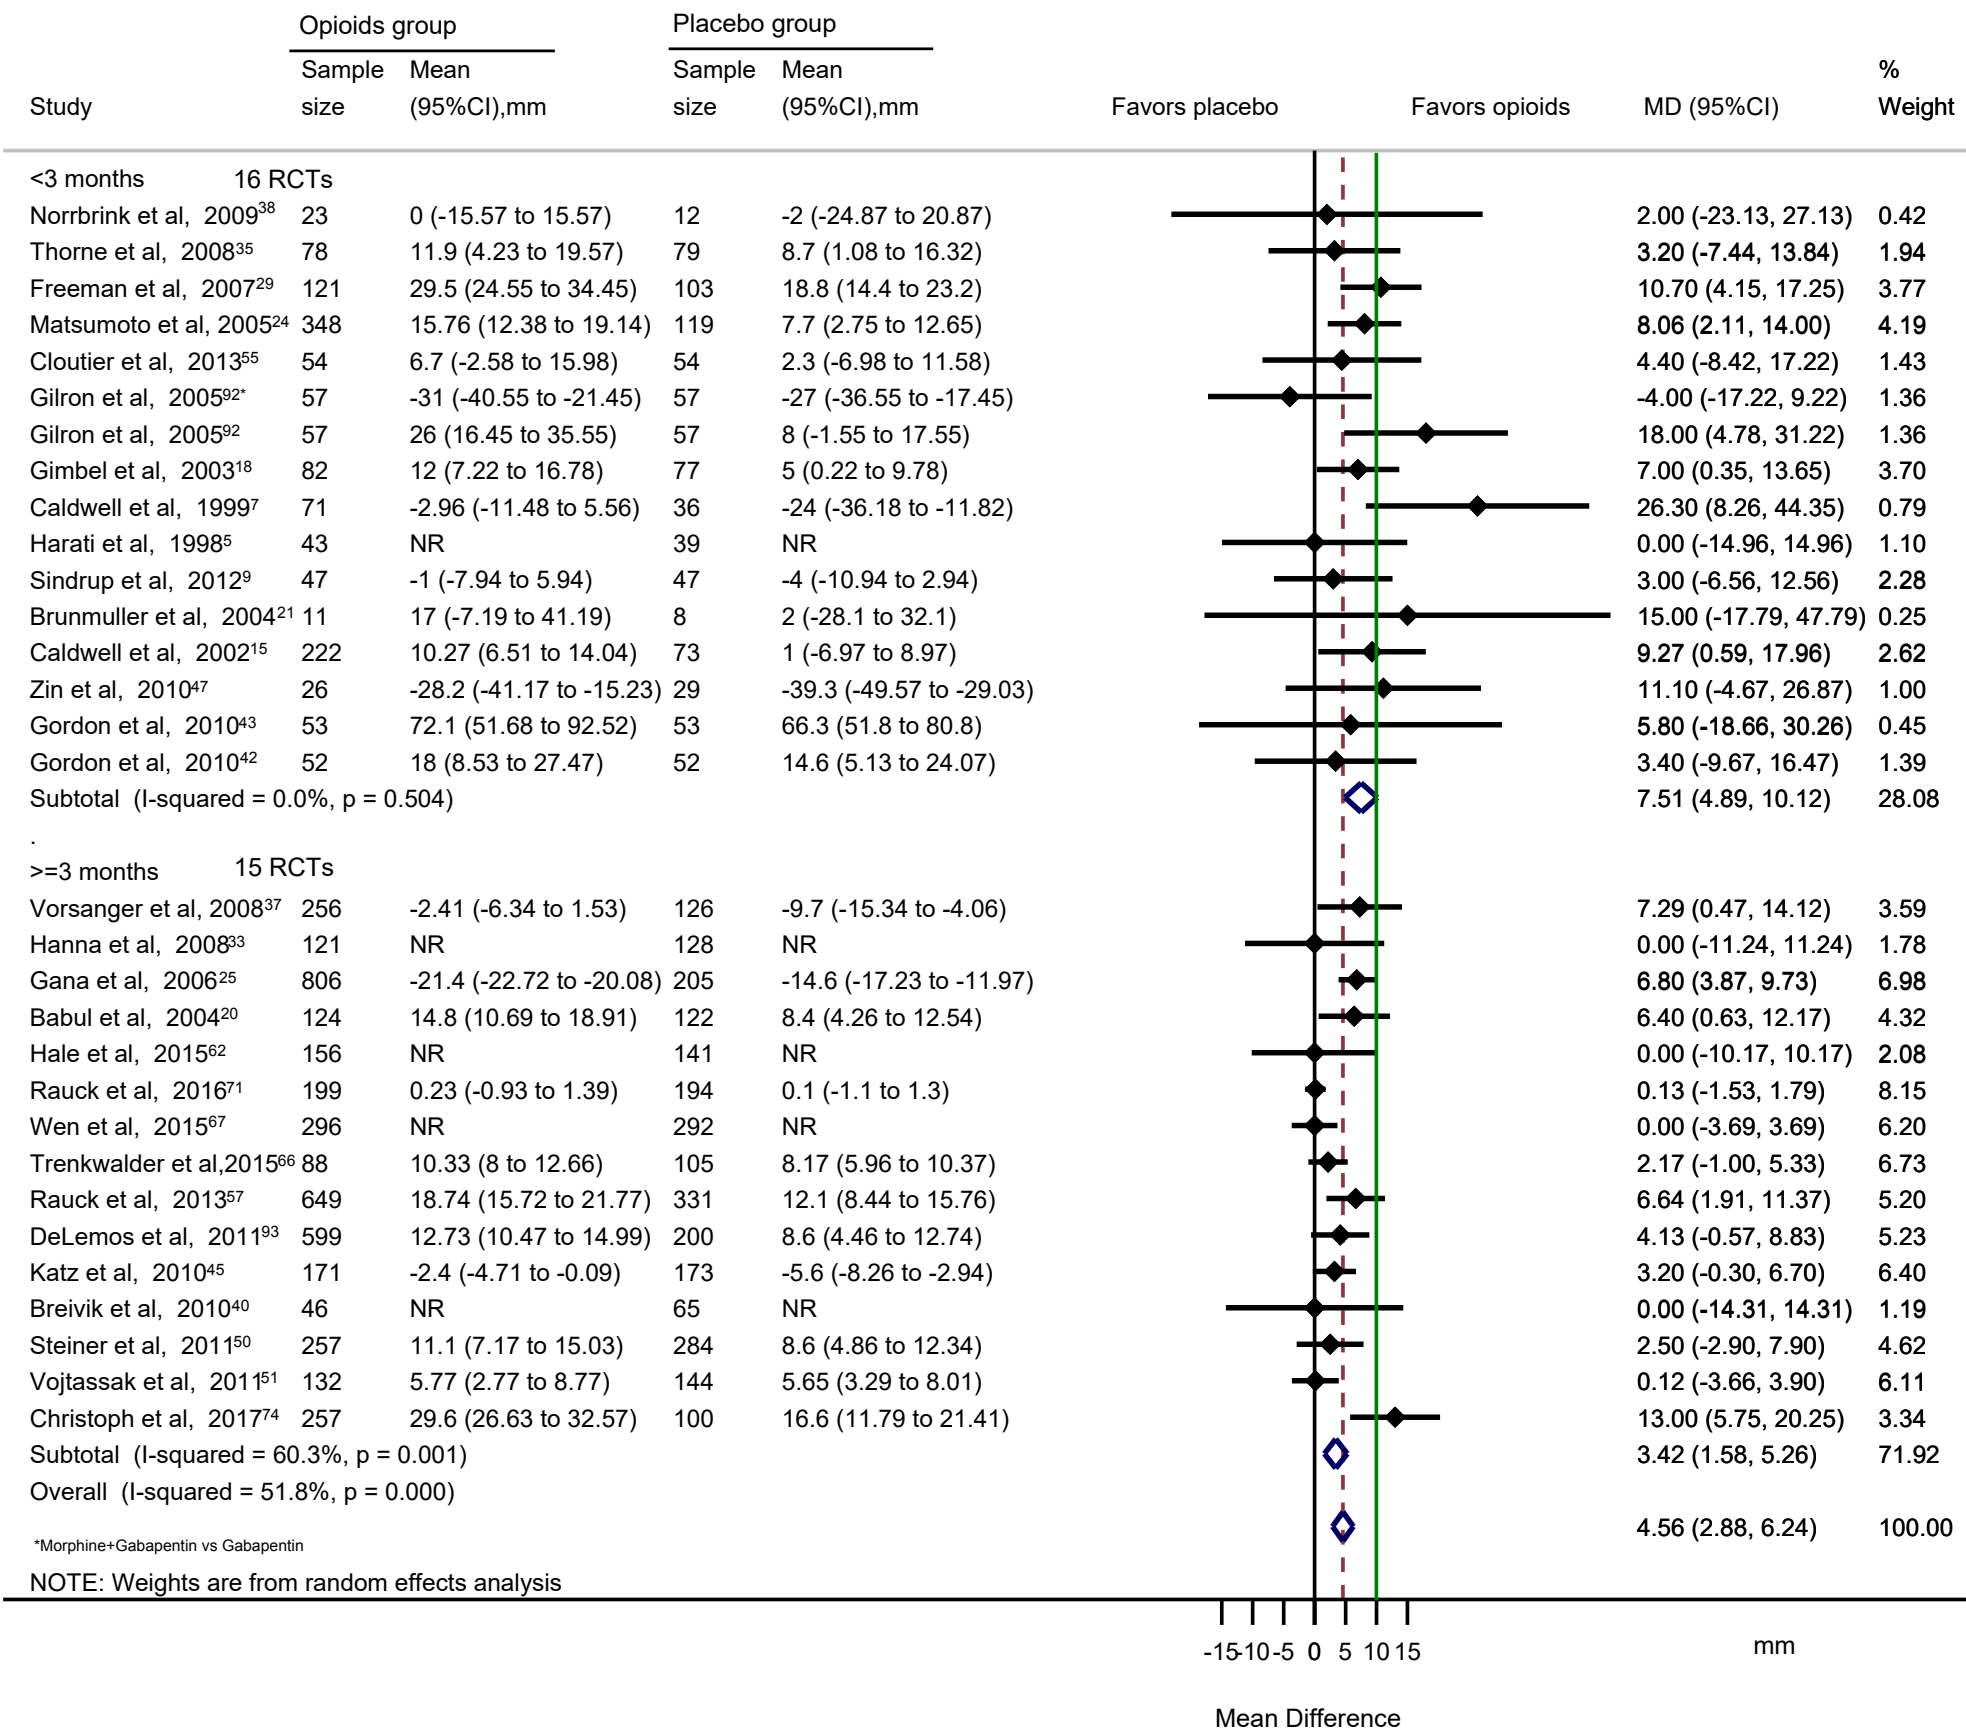

\*Morphine+Gabapentin vs Gabapentin

NOTE: Weights are from random effects analysis

Test of interaction p=0.03. RCTs: Randomized clinical trials; NR: not reported due to imputed data for non-significant results; VAS: visual analog scale; the green line represents the minimally important difference. The mean and 95%CI in each group are within-group change from baseline data, and the mean difference (MD) and 95%CI are between-group differences in change from baseline data. © 2018 American Medical Association. All rights reserved.

**eFigure 12: Meta-regression for sleep quality and length of follow-up for 31 randomized clinical trials of opioids vs. placebo**

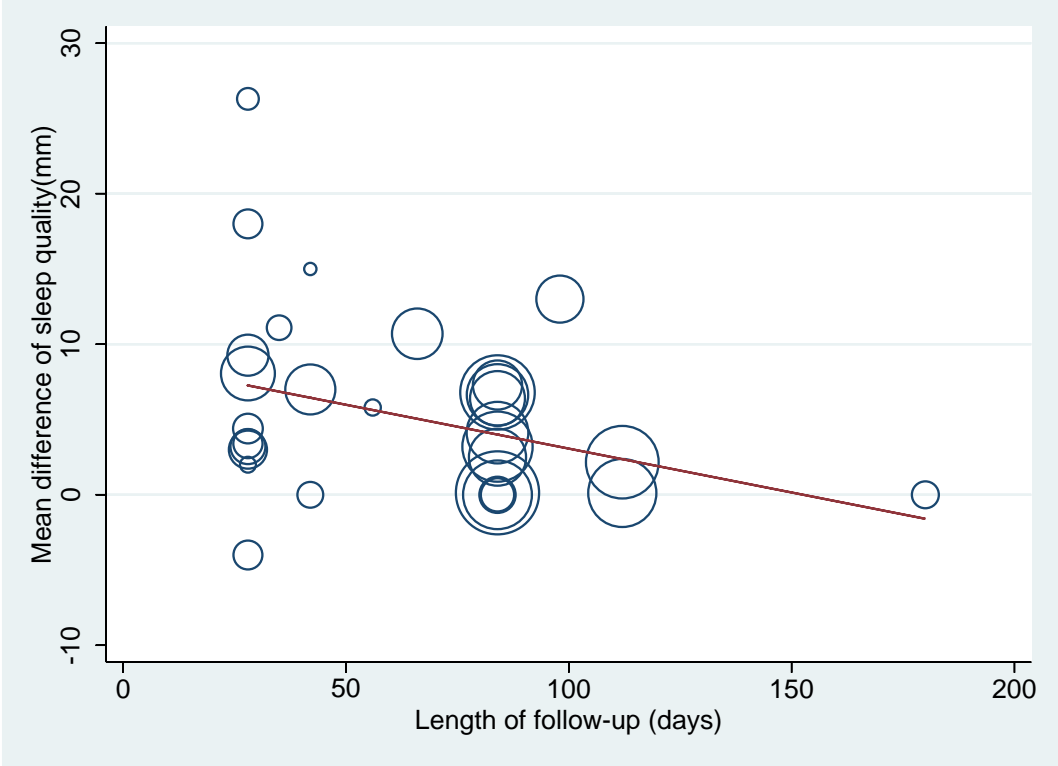

p-value =0.03 for the slope among 31 trials

The size of circle represents the weight of each study in the fitted random-effects meta-regression model (i.e. the inverse of its total variance)



**eFigure 13: Vomiting among chronic noncancer pain patients receiving opioids vs. placebo from 51 randomized clinical trials**

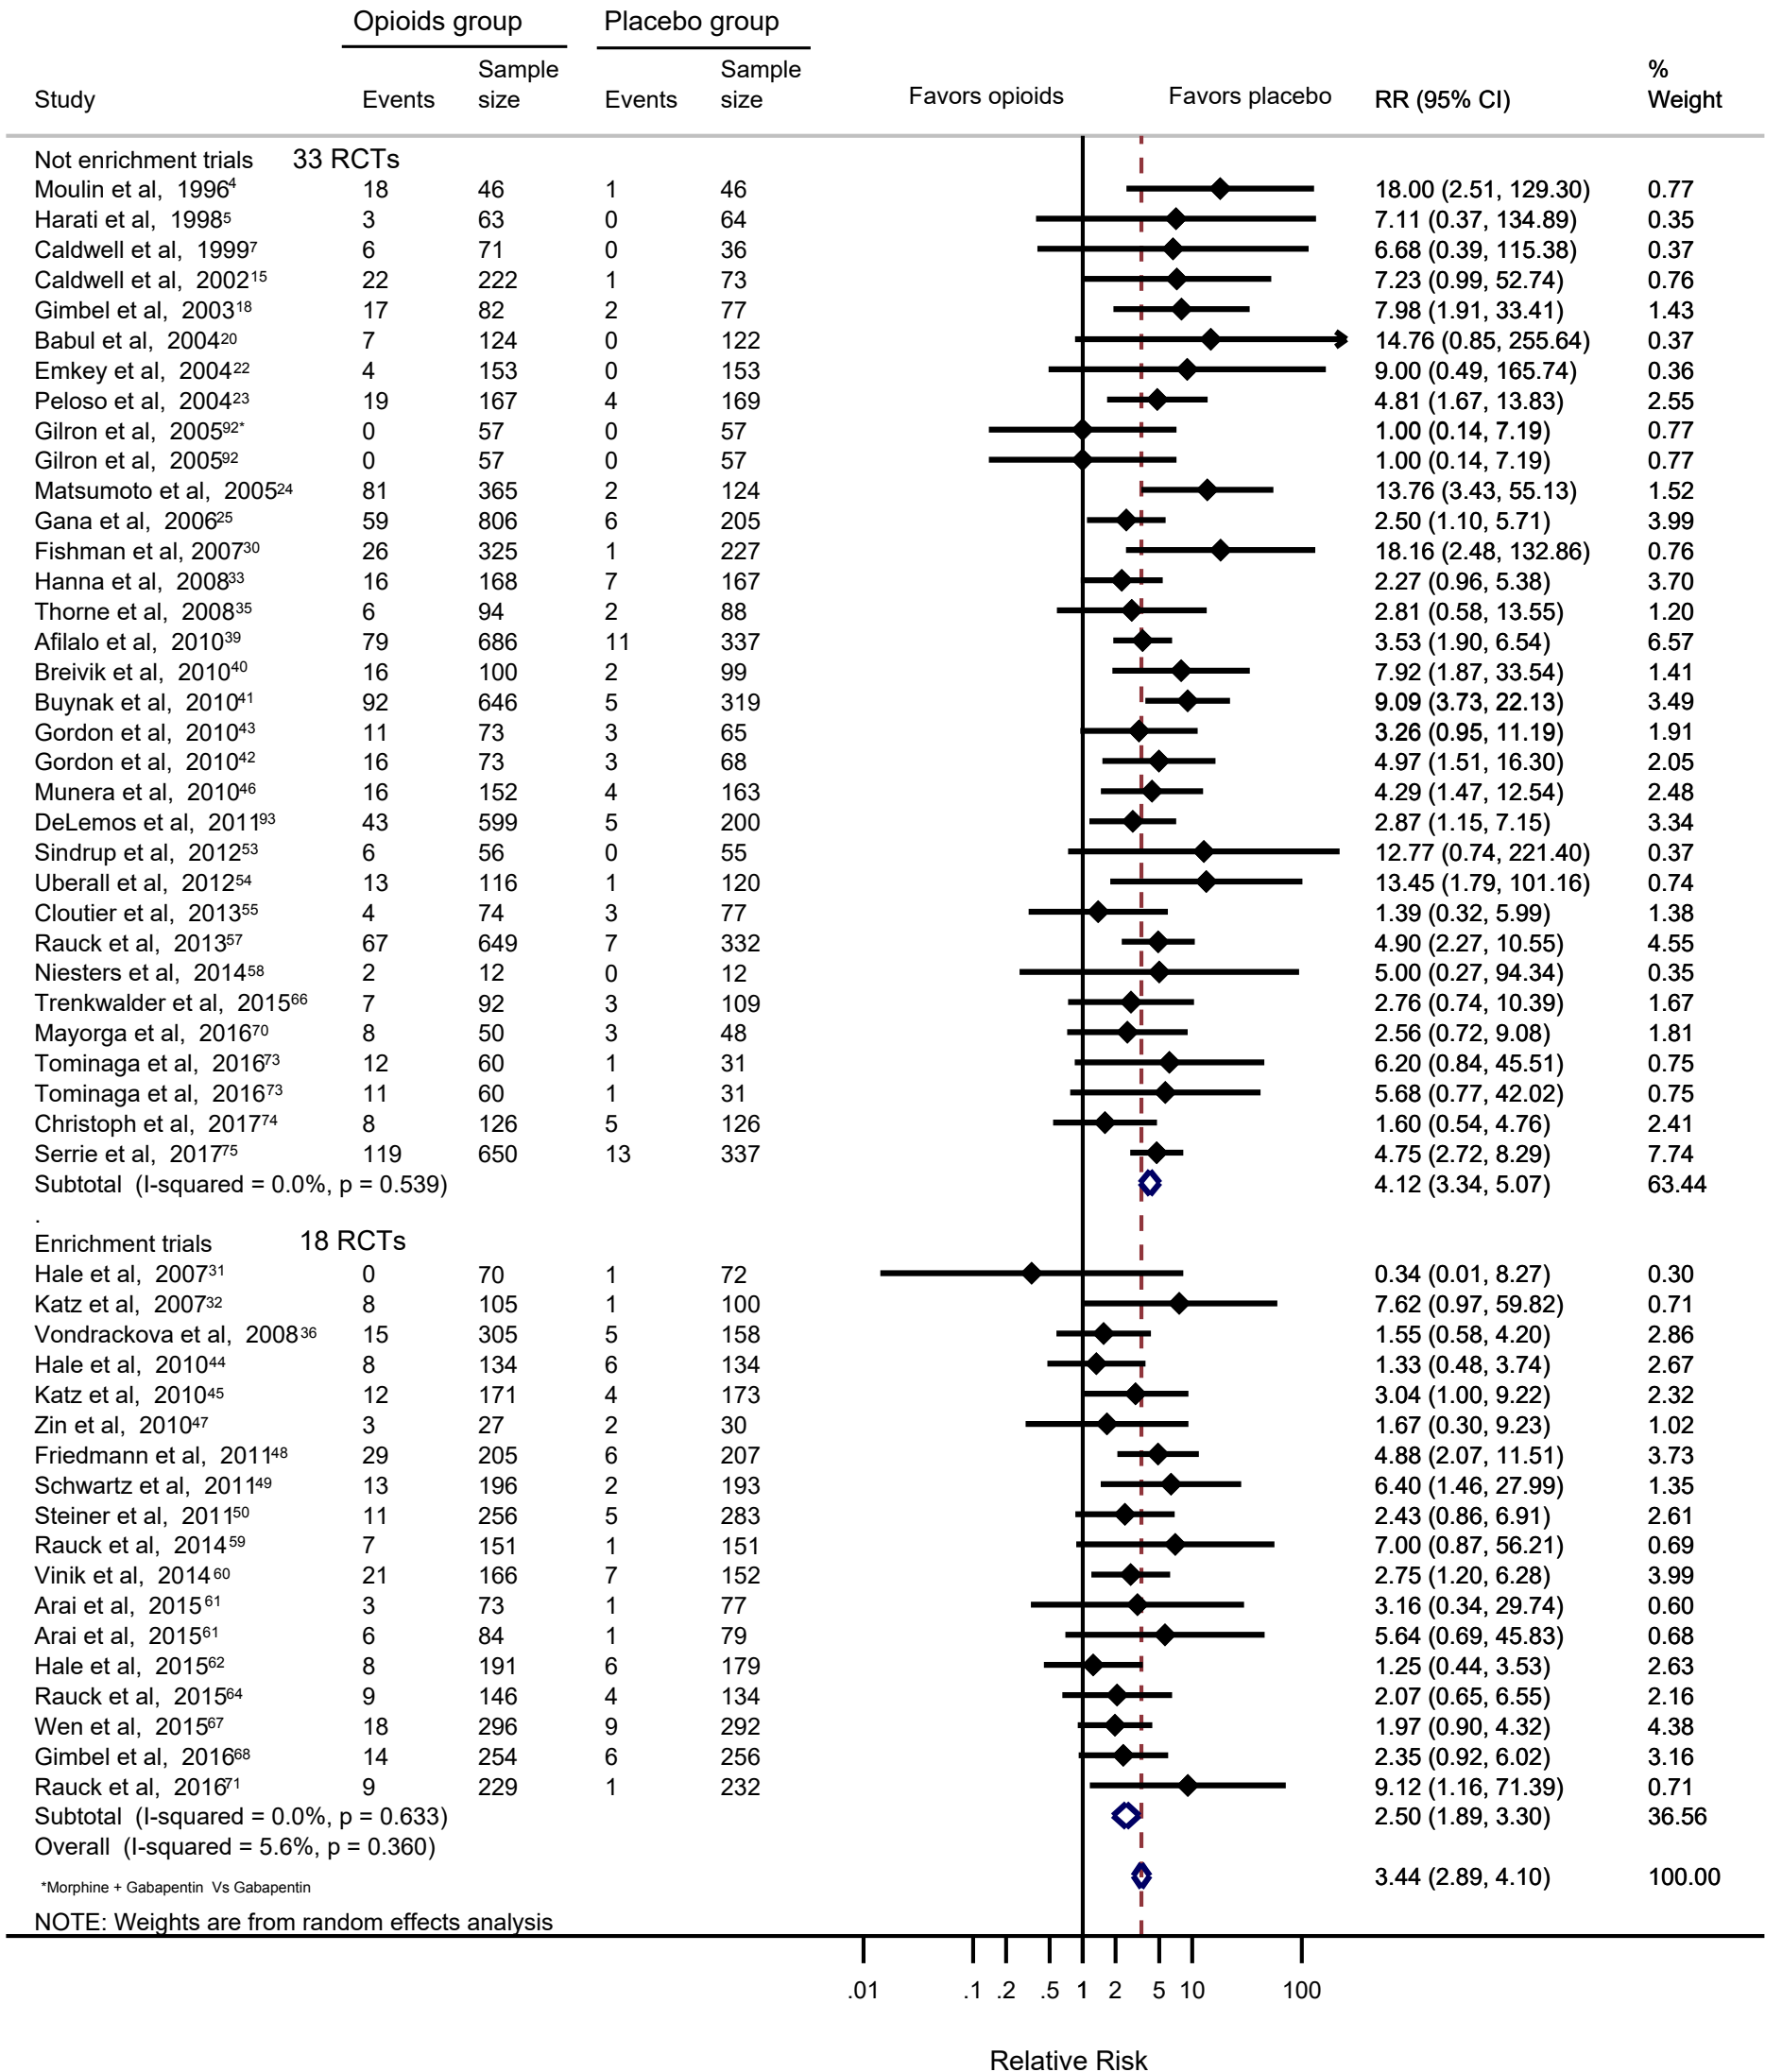

\*Morphine + Gabapentin Vs Gabapentin

NOTE: Weights are from random effects analysis

Test of interaction p=0.007 for enrichment trials vs not; RR: relative risk; RCTs: Randomized clinical trials; enrichment trials precede randomization with an open-label treatment phase that is undertaken to exclude patients with problematic adverse events and/or poor response to treatment; events represent the number of patients experiencing vomiting in each group

**eFigure 14: Meta-regression for pain relief and opioid dose among 5 trials with 14 within-study comparisons**

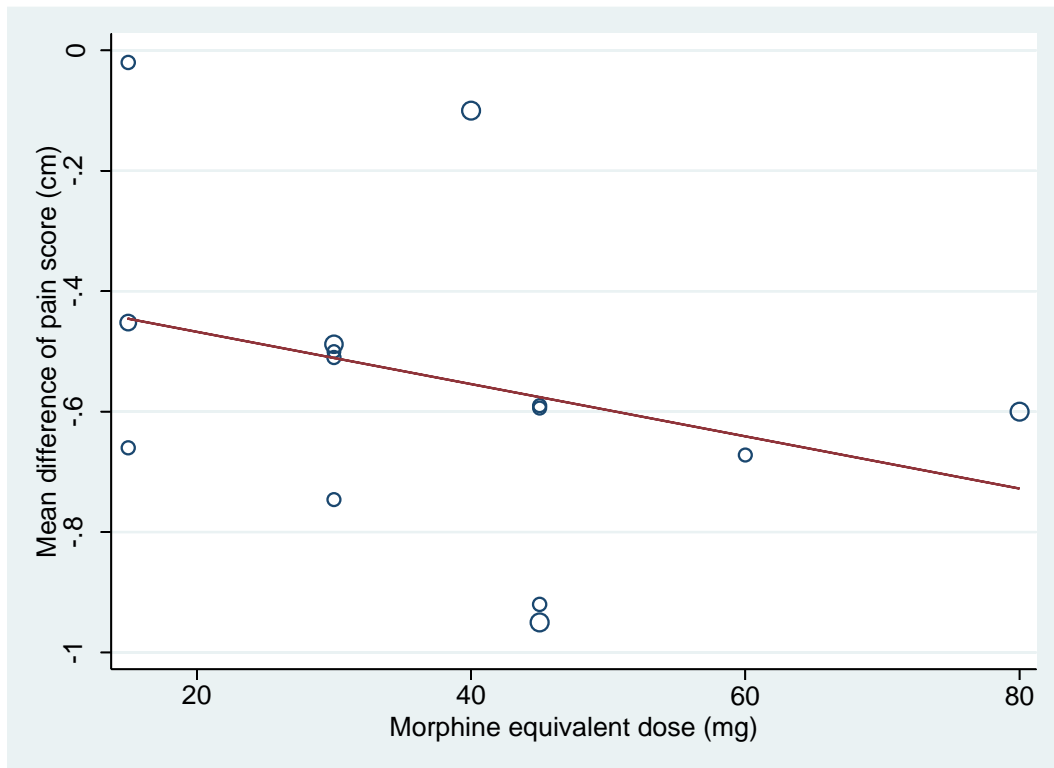

P-value = 0.39 for the slope among 5 trials with 14 within-study comparisons

One of six trials were excluded from meta-regression as they randomized patients to receive the opioid 'Cebranopadol' for which there is no established morphine equivalent dose (MED) conversion factor<sup>74</sup>

The size of circle represents the weight of each study in the fitted random-effects meta-regression model (i.e. the inverse of its total variance)

**eFigure 15: Meta-regression for physical function and opioid dose among 4 trials with 11 within-study comparisons**

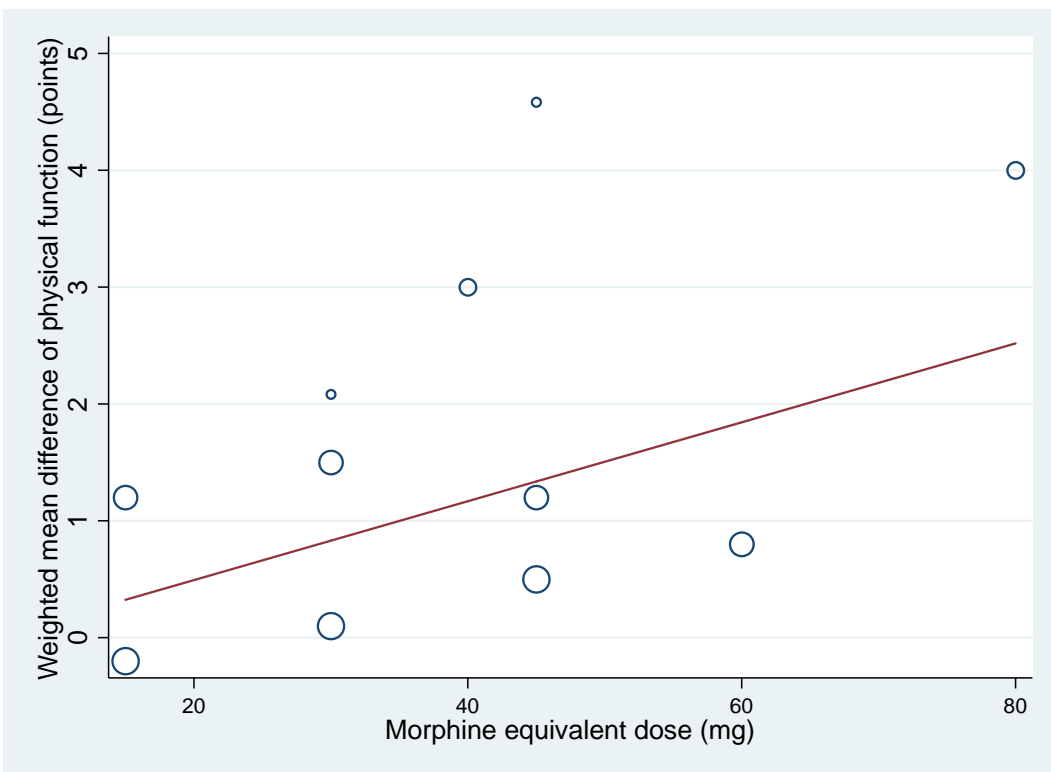

P-value = 0.22 for the slope among 4 trials with 11 within-study comparisons

One of six trials were excluded from meta-regression as they randomized patients to receive the opioid 'Cebranopadol' for which there is no established morphine equivalent dose (MED) conversion factor<sup>74</sup>

The size of circle represents the weight of each study in the fitted random-effects meta-regression model (i.e. the inverse of its total variance)

**eFigure 16: Meta-regression for gastrointestinal adverse events and opioid dose among 5 trials with 14 within-study comparisons**

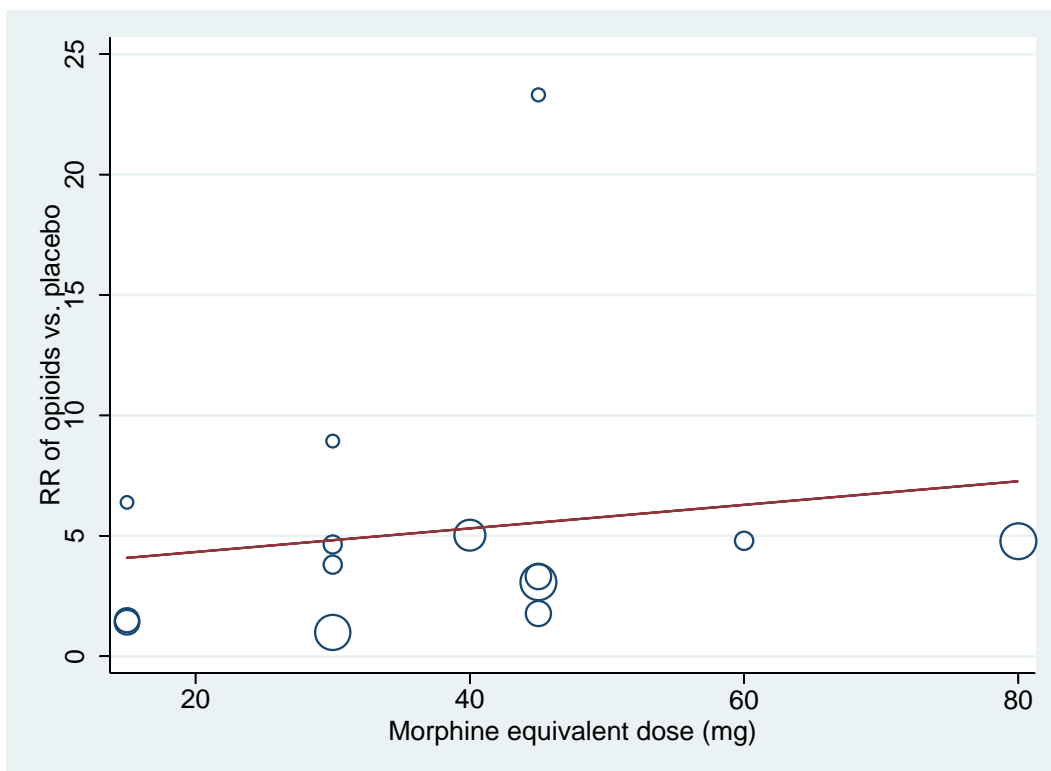

P-value = 0.12 for the slope among 5 trials with 14 within-study comparisons; RR: relative risk;

The size of circle represents the weight of each study in the fitted random-effects meta-regression model (i.e. the inverse of its total variance)

One of six trials were excluded from meta-regression as they randomized patients to receive the opioid 'Cebranopadol' for which there is no established morphine equivalent dose (MED) conversion factor<sup>74</sup>
